# Supplementary material for: A survey of accepted authors in computer systems conferences
Source: PeerJ Comput Sci. 2020 Sep 28;6:e299. doi: 10.7717/peerj-cs.299 (PMC7924675; doi:10.7717/peerj-cs.299)
Supplement: Supplemental Information 3 — The legend for all fields is in File S4. [file peerj-cs-06-299-s003.xls]

## Sheet: survey-tidy-anon
response_id	position	gender	native_english	conf_id	months_research	prior_subs	any_english	allow_rebuttal	use_rebuttal	rebuttal_helpful	reviews	understanding	helpfulness	fairness	length	gr_overall	gr_technical	gr_present	gr_impact	gr_originality	gr_relevance	gr_confidence
R_278TT9QeX8uwAl5	Industry Researcher	F	FALSE	16	7-9	1	FALSE	FALSE			3
R_1ImSUpbWtczafgb	Postdoctoral Researcher	M	TRUE	18	>12	1	TRUE	TRUE	TRUE	TRUE	3	Missed some minor points	Very helpful	Somewhat fair	A Page	0	1			0.5		1
R_1ImSUpbWtczafgb	Postdoctoral Researcher	M	TRUE	18	>12	1	TRUE	TRUE	TRUE	TRUE	3	Perfectly	Not at all	Fair	A Page	0	1			0.75		0.5
R_1ImSUpbWtczafgb	Postdoctoral Researcher	M	TRUE	18	>12	1	TRUE	TRUE	TRUE	TRUE	3	Misunderstood major points	Somewhat helpful	Somewhat fair	A Page	0	1			0.5		1
R_10ZcNNKLrkTt1C5	Assistant Professor	F	TRUE	53	>12	2	TRUE	TRUE	TRUE	TRUE	4	Missed some minor points	Somewhat helpful	Somewhat fair	A Page	0.5						1
R_10ZcNNKLrkTt1C5	Assistant Professor	F	TRUE	53	>12	2	TRUE	TRUE	TRUE	TRUE	4	Perfectly	Somewhat helpful	Fair	A Page	0.75						1
R_10ZcNNKLrkTt1C5	Assistant Professor	F	TRUE	53	>12	2	TRUE	TRUE	TRUE	TRUE	4	Missed some minor points	Somewhat helpful	Somewhat fair	A Page	0.25						1
R_10ZcNNKLrkTt1C5	Assistant Professor	F	TRUE	53	>12	2	TRUE	TRUE	TRUE	TRUE	4	Missed some minor points	Somewhat helpful	Somewhat fair	A Page	0.25						1
R_2BboQgHP6RNmZbe	Government Researcher	M	TRUE	1	7-9	0	TRUE	TRUE	FALSE	TRUE	4
R_2V9hIIbByPyjPmJ	Professor	M	FALSE	50	7-9	0	FALSE	TRUE	TRUE	FALSE	6+
R_uqWqJYXnV9X8qVr	Student		FALSE	18	10-12	3	FALSE	TRUE	TRUE	TRUE	3	Missed some minor points	Very helpful	Fair	A Page	0.666667	1	1	0.666667	0.666667	0.666667	0.666667
R_uqWqJYXnV9X8qVr	Student		FALSE	18	10-12	3	FALSE	TRUE	TRUE	TRUE	3	Missed some minor points	Very helpful	Fair	A Page	0.666667	0.666667	1	0.666667	0.333333	0.666667	0.666667
R_uqWqJYXnV9X8qVr	Student		FALSE	18	10-12	3	FALSE	TRUE	TRUE	TRUE	3	Missed some minor points	Somewhat helpful	Fair	A Page	0.666667	0.666667	0.666667	0.666667	0.333333	0.666667	0.666667
R_z10FWAXIdSAFMpr	Assistant Professor	M	FALSE	16
R_2aeMPtqOnDciY9d	Student	F	TRUE	46	10-12	4	TRUE	FALSE			4	Missed some minor points	Somewhat helpful	Fair	1-2 Paragraphs	0.75			0.75			0.666667
R_2aeMPtqOnDciY9d	Student	F	TRUE	46	10-12	4	TRUE	FALSE			4	Missed some minor points	Somewhat helpful	Fair	A Page	0.75			0.75			0.666667
R_2aeMPtqOnDciY9d	Student	F	TRUE	46	10-12	4	TRUE	FALSE			4	Perfectly	Very helpful	Fair	Multiple Pages	0.75			0.5			0.333333
R_2aeMPtqOnDciY9d	Student	F	TRUE	46	10-12	4	TRUE	FALSE			4	Missed some minor points	Somewhat helpful	Somewhat fair	Half a Page	0.5			0.5			0.333333
R_22lzDuuLUN7p7BN	Student	F	FALSE	7	>12	3	TRUE	TRUE	TRUE	TRUE	4
R_10x5ysmRCnxW6GQ	Assistant Professor	M	TRUE	53	4-6	2	TRUE	TRUE	TRUE	TRUE	3	Perfectly	Somewhat helpful	Fair	A Page	1						1
R_10x5ysmRCnxW6GQ	Assistant Professor	M	TRUE	53	4-6	2	TRUE	TRUE	TRUE	TRUE	3	Misunderstood major points	Not at all	Somewhat fair	1-2 Paragraphs	0.666667						0.5
R_10x5ysmRCnxW6GQ	Assistant Professor	M	TRUE	53	4-6	2	TRUE	TRUE	TRUE	TRUE	3	Missed some minor points	Somewhat helpful	Somewhat fair	Multiple Pages	0.666667						1
R_rkJFFJhLEIyMJ0d	Other	M	FALSE	30
R_2fCHSrpEsqbM4Qe	Student	M	FALSE	21	7-9	1	FALSE	TRUE	TRUE	TRUE	4
R_3yFsQBLCQus0GA1	Student	M	TRUE	26	>12	1	TRUE	TRUE	TRUE	TRUE	6+	Perfectly	Somewhat helpful	Fair	Half a Page	1	0.666667	1	1	1		0.333333
R_3yFsQBLCQus0GA1	Student	M	TRUE	26	>12	1	TRUE	TRUE	TRUE	TRUE	6+	Perfectly	Very helpful	Fair	A Page	0.5	0.25	0.25	0.25	0.5		0.5
R_3yFsQBLCQus0GA1	Student	M	TRUE	26	>12	1	TRUE	TRUE	TRUE	TRUE	6+	Perfectly	Somewhat helpful	Fair	Half a Page	1	0.666667	1	1	1		0.666667
R_3yFsQBLCQus0GA1	Student	M	TRUE	26	>12	1	TRUE	TRUE	TRUE	TRUE	6+	Missed some minor points	Somewhat helpful	Somewhat fair	Half a Page	0.5	0.666667	0.666667	0.666667	0.666667		0.333333
R_3yFsQBLCQus0GA1	Student	M	TRUE	26	>12	1	TRUE	TRUE	TRUE	TRUE	6+	Misunderstood major points	Somewhat helpful	Somewhat fair	A Page	0.25	0.666667	0.333333	0.666667	0.333333		1
R_3yFsQBLCQus0GA1	Student	M	TRUE	26	>12	1	TRUE	TRUE	TRUE	TRUE	6+	Missed some minor points	Very helpful	Fair	Multiple Pages	0.5	0.333333	0.333333	0.666667	0.666667		0.666667
R_26gnRMUWg7fVstP	Student	M	FALSE	18	10-12	0	TRUE	FALSE			3
R_2sZ28gGSSBoflSk	Student	M	TRUE	26	7-9	0	TRUE	FALSE			6+	Perfectly	Somewhat helpful	Fair	Multiple Pages	0.25	1	0.666667	1	0.333333		1
R_2sZ28gGSSBoflSk	Student	M	TRUE	26	7-9	0	TRUE	FALSE			6+	Perfectly	Somewhat helpful	Fair	Multiple Pages	0.75	0.666667	0.333333	0.666667	0.666667		0.666667
R_2sZ28gGSSBoflSk	Student	M	TRUE	26	7-9	0	TRUE	FALSE			6+	Missed some minor points	Somewhat helpful	Fair	Multiple Pages	0.5	0.666667	0.666667	0.666667	0.666667		0.333333
R_2sZ28gGSSBoflSk	Student	M	TRUE	26	7-9	0	TRUE	FALSE			6+	Missed some minor points	Somewhat helpful	Fair	Multiple Pages	0.25	0.666667	0.333333	0.666667	0.666667		0.333333
R_2sZ28gGSSBoflSk	Student	M	TRUE	26	7-9	0	TRUE	FALSE			6+	Missed some minor points	Somewhat helpful	Fair	Multiple Pages	0.25	0.666667	0.666667	0.666667	0.333333		0.666667
R_2sZ28gGSSBoflSk	Student	M	TRUE	26	7-9	0	TRUE	FALSE			6+	Missed some minor points	Somewhat helpful	Somewhat fair	Multiple Pages	0.75	0.666667	0.666667	0.666667	0.666667		0.333333
R_ujLx1O7hI6rSidP	Government Researcher	M	FALSE	15	7-9	0	TRUE	FALSE			4	Perfectly	Somewhat helpful	Fair	Half a Page
R_ujLx1O7hI6rSidP	Government Researcher	M	FALSE	39	4-6	0	FALSE	TRUE	TRUE	TRUE	5	Perfectly	Somewhat helpful	Fair	A Page
R_1qWJoQC0lITombb	Student	M	FALSE	54	10-12	2	FALSE	TRUE	TRUE	TRUE	5	Perfectly	Very helpful	Fair	A Page
R_3lzFt3ROUj0aohz	Industry Researcher	M	TRUE	38	>12	1	TRUE	FALSE			5	Perfectly	Very helpful	Fair	Multiple Pages	0.75		1		0.666667		1
R_3lzFt3ROUj0aohz	Industry Researcher	M	TRUE	38	>12	1	TRUE	FALSE			5	Perfectly	Somewhat helpful	Fair	1-2 Paragraphs	1		1		0.333333		0.333333
R_3lzFt3ROUj0aohz	Industry Researcher	M	TRUE	38	>12	1	TRUE	FALSE			5	Perfectly	Somewhat helpful	Fair	1-2 Paragraphs	0.75		1		0.666667		0.333333
R_3lzFt3ROUj0aohz	Industry Researcher	M	TRUE	38	>12	1	TRUE	FALSE			5	Perfectly	Very helpful	Fair	A Page	0.75		1		0.666667		0.666667
R_3lzFt3ROUj0aohz	Industry Researcher	M	TRUE	38	>12	1	TRUE	FALSE			5	Perfectly	Very helpful	Fair	A Page	0.5		0.666667		0.333333		0.666667
R_2YigMFEsNPwfBng	Professor	M	FALSE	2	10-12	0	FALSE	TRUE	TRUE	TRUE	5	Missed some minor points	Somewhat helpful	Somewhat fair	Half a Page
R_307bNqah2TzUIJB	Student	M	FALSE	34	7-9	3	TRUE	TRUE	TRUE	TRUE	5
R_24JjyfRRDCJWxYX	Other	M	FALSE	16	>12	1	FALSE	FALSE			4	Misunderstood major points	Somewhat helpful	Unfair	Half a Page
R_Zlevp70U6wKjfyx	Associate Professor	M	FALSE	35	>12	2	FALSE	TRUE	TRUE	TRUE	6+	Misunderstood major points	Somewhat helpful	Somewhat fair	A Page	0.25						1
R_Zlevp70U6wKjfyx	Associate Professor	M	FALSE	35	>12	2	FALSE	TRUE	TRUE	TRUE	6+	Misunderstood major points	Somewhat helpful	Somewhat fair	Half a Page	0.5						0.666667
R_Zlevp70U6wKjfyx	Associate Professor	M	FALSE	35	>12	2	FALSE	TRUE	TRUE	TRUE	6+	Probably didn't read it	Not at all	Very unfair	1-2 Paragraphs	0						0.666667
R_Zlevp70U6wKjfyx	Associate Professor	M	FALSE	35	>12	2	FALSE	TRUE	TRUE	TRUE	6+	Missed some minor points	Somewhat helpful	Fair	Half a Page	0.75						0.333333
R_Zlevp70U6wKjfyx	Associate Professor	M	FALSE	35	>12	2	FALSE	TRUE	TRUE	TRUE	6+	Missed some minor points	Somewhat helpful	Fair	A Page	0.5						0
R_Zlevp70U6wKjfyx	Associate Professor	M	FALSE	35	>12	2	FALSE	TRUE	TRUE	TRUE	6+	Missed some minor points	Somewhat helpful	Fair	Half a Page	0.75						1
R_2trP3UEqIxoKRjn	Student	F	FALSE	48	4-6	0	FALSE	FALSE			3
R_1MR3QwSYu2N2Hfg	Industry Researcher	M	FALSE	40	1-3	0	FALSE	FALSE			3	Misunderstood major points	Somewhat helpful	Somewhat fair	Half a Page	0.5	0.5	0.5	0.666667	0.5	1	0.5
R_1MR3QwSYu2N2Hfg	Industry Researcher	M	FALSE	40	1-3	0	FALSE	FALSE			3	Perfectly	Very helpful	Fair	A Page	0.75	0.75	0.75	1	0.75	1	1
R_1MR3QwSYu2N2Hfg	Industry Researcher	M	FALSE	40	1-3	0	FALSE	FALSE			3	Missed some minor points	Very helpful	Fair	Half a Page	0.75	0.75	0.75	1	0.75	1	1
R_1DCNiDPIge9qrVG	Assistant Professor	M	FALSE	7	4-6	0	FALSE	TRUE	TRUE	TRUE	3
R_Oxorr4z1kYiuGv7	Professor		TRUE	26	>12	0	TRUE	FALSE			0
R_2CT8RAVfCZK0tMF	Other	M	TRUE	31	7-9	2	TRUE	TRUE	FALSE	FALSE	4
R_1jiIilD40vnv9t5	Student	M	FALSE	10	7-9	0	FALSE	FALSE			5	Missed some minor points	Somewhat helpful	Somewhat fair	Half a Page		0.666667		0.666667	0	1	1
R_1jiIilD40vnv9t5	Student	M	FALSE	10	7-9	0	FALSE	FALSE			5	Perfectly	Very helpful	Fair	A Page		1		0.666667	1	0.666667	0.666667
R_1jiIilD40vnv9t5	Student	M	FALSE	10	7-9	0	FALSE	FALSE			5	Missed some minor points	Somewhat helpful	Somewhat fair	1-2 Paragraphs		1		0.666667	0.666667	0.666667	0.666667
R_1jiIilD40vnv9t5	Student	M	FALSE	10	7-9	0	FALSE	FALSE			5	Perfectly	Very helpful	Fair	Half a Page		1		0.333333	0.666667	1	0.333333
R_1jiIilD40vnv9t5	Student	M	FALSE	10	7-9	0	FALSE	FALSE			5	Perfectly	Somewhat helpful	Fair	Half a Page		1		1	0.333333	1	1
R_1ePP6oN636N4I3a	Student	M	FALSE	5
R_3jVvGtYrg7aQ7Mg	Student	M	FALSE	55	>12	0	FALSE	TRUE	TRUE	TRUE	6+
R_3sB27d7P7gvcaZy	Government Researcher	M	FALSE	1	7-9	2	TRUE	FALSE			3	Perfectly	Somewhat helpful	Fair	Half a Page	1
R_3sB27d7P7gvcaZy	Government Researcher	M	FALSE	1	7-9	2	TRUE	FALSE			3	Missed some minor points	Somewhat helpful	Fair	Half a Page	0.666667
R_3sB27d7P7gvcaZy	Government Researcher	M	FALSE	1	7-9	2	TRUE	FALSE			3	Missed some minor points	Somewhat helpful	Somewhat fair	A Page	0.333333
R_1Hnrv8HsWu2vFtR	Industry Researcher	M	FALSE	53
R_28GxHIPLR2VUQL3	Assistant Professor	M	FALSE	3	1-3	2	FALSE	FALSE			3	Misunderstood major points	Not at all	Unfair	1-2 Paragraphs
R_1dp00kQGE31DQfM	Postdoctoral Researcher	M	FALSE	15	4-6	1	TRUE	FALSE			4	Missed some minor points	Somewhat helpful	Fair	Half a Page	1		1		0.666667		1
R_1dp00kQGE31DQfM	Postdoctoral Researcher	M	FALSE	15	4-6	1	TRUE	FALSE			4	Perfectly	Very helpful	Fair	A Page	0.75		1		0.333333		0.333333
R_1dp00kQGE31DQfM	Postdoctoral Researcher	M	FALSE	15	4-6	1	TRUE	FALSE			4	Missed some minor points	Somewhat helpful	Fair	A Page	0.25		0.666667		0.666667		0.333333
R_1dp00kQGE31DQfM	Postdoctoral Researcher	M	FALSE	15	4-6	1	TRUE	FALSE			4	Missed some minor points	Somewhat helpful	Fair	Half a Page	0.5		1		0.333333		0.666667
R_1dp00kQGE31DQfM	Postdoctoral Researcher	M	FALSE	15	4-6	1	TRUE	FALSE			4					0.75		1		0.666667		0.666667
R_1z9JlolXII6pzdn	Student	F	FALSE	45	4-6	0	FALSE	TRUE	TRUE	TRUE	3	Missed some minor points	Somewhat helpful	Somewhat fair	Half a Page	0.666667	0.666667	0.666667	0.666667	0.666667	0.666667	0.666667
R_1z9JlolXII6pzdn	Student	F	FALSE	45	4-6	0	FALSE	TRUE	TRUE	TRUE	3	Missed some minor points	Somewhat helpful	Somewhat fair	Half a Page	0.666667	0.666667	0.666667	0.666667	0.666667	0.666667	0.666667
R_1z9JlolXII6pzdn	Student	F	FALSE	45	4-6	0	FALSE	TRUE	TRUE	TRUE	3	Missed some minor points	Somewhat helpful	Fair	Half a Page	0.666667	0.666667	0.666667	0.666667	0.666667	1	0.666667
R_30riftbHca3EEzi	Assistant Professor	M	TRUE	53	4-6	0	TRUE	TRUE	TRUE	TRUE	4
R_3k7nxqOAKm424Ym	Student	M	FALSE	3	10-12	1	FALSE	FALSE			3	Missed some minor points	Somewhat helpful	Somewhat fair	Half a Page	1	0.333333	0.666667	0.666667	0.333333	1	1
R_3k7nxqOAKm424Ym	Student	M	FALSE	3	10-12	1	FALSE	FALSE			3	Missed some minor points	Not at all	Somewhat fair	Half a Page	0.666667	0.333333	0.333333	0.666667	0.333333	1	0.333333
R_3k7nxqOAKm424Ym	Student	M	FALSE	3	10-12	1	FALSE	FALSE			3	Misunderstood major points	Not at all	Unfair	1-2 Paragraphs	0	0.333333	0	0	0	1	0.333333
R_3k7nxqOAKm424Ym	Student	M	FALSE	1	7-9	1	FALSE	FALSE			4	Missed some minor points	Not at all	Somewhat fair	1-2 Paragraphs	0.833333
R_3k7nxqOAKm424Ym	Student	M	FALSE	1	7-9	1	FALSE	FALSE			4	Perfectly	Very helpful	Fair	Half a Page	0.666667
R_3k7nxqOAKm424Ym	Student	M	FALSE	1	7-9	1	FALSE	FALSE			4	Missed some minor points	Somewhat helpful	Somewhat fair	Half a Page	0.833333
R_3k7nxqOAKm424Ym	Student	M	FALSE	1	7-9	1	FALSE	FALSE			4	Missed some minor points	Somewhat helpful	Fair	Half a Page	0.333333
R_1dKtSjMZpJ24X9X	Student	M	FALSE	2	10-12	1	TRUE	TRUE	TRUE	TRUE	4
R_3PpmoOYTUzgAG0j	Industry Researcher	M	FALSE	22
R_1P6toh3yqFzuMUt	Student		FALSE	45	1-3	0	FALSE	FALSE			4
R_1E0Uryx6xrG1s7g	Assistant Professor	F	FALSE	48	7-9	0	FALSE	FALSE			3	Perfectly	Somewhat helpful	Fair	A Page	0.75	0.75	0.75	0.75	0.75	0.75	0.75
R_1E0Uryx6xrG1s7g	Assistant Professor	F	FALSE	48	7-9	0	FALSE	FALSE			3	Missed some minor points	Very helpful	Fair	A Page	1	0.75	0.75	0.75	0.75	0.75	0.75
R_1E0Uryx6xrG1s7g	Assistant Professor	F	FALSE	48	7-9	0	FALSE	FALSE			3	Missed some minor points	Very helpful	Fair	A Page	0.25	0.5	0.5	0.5	0.5	0.5	0.5
R_TdTDFnFueUJMfq9	Industry Researcher	M	FALSE	21
R_sA4XJzn5Qzt8jux	Associate Professor	F	FALSE	23	4-6	0	FALSE	FALSE			4	Missed some minor points	Somewhat helpful	Fair	Multiple Pages
R_tET6Brvv0e5TH1v	Associate Professor		FALSE	2	10-12	1	FALSE	TRUE	TRUE	TRUE	5
R_OAM80TCPqXmoFLr	Assistant Professor	M	TRUE	37	>12	1	TRUE	FALSE			4
R_3kils0PDzyXPsdt	Student	M	FALSE	38	10-12	0	TRUE	FALSE			5	Perfectly	Somewhat helpful	Fair	Half a Page
R_3wRbZ8jCcJUULPH	Student	M	FALSE	12	>12	1	FALSE	TRUE	TRUE	TRUE	6+
R_1dogEsZgtCHzaLh	Student	F	FALSE	14	>12	0	TRUE	TRUE	TRUE	FALSE	5
R_72paQgZ06lEogLv	Other		FALSE	23	4-6	0	FALSE	TRUE	TRUE	TRUE	3	Misunderstood major points	Somewhat helpful	Somewhat fair	1-2 Paragraphs
R_25ZabD5XxQw3K6R				2
R_e3XuvgVTaJDzZjr	Student	M	FALSE	50	4-6	0	TRUE	TRUE	TRUE	TRUE	6+	Missed some minor points	Somewhat helpful	Fair	A Page					1		1
R_e3XuvgVTaJDzZjr	Student	M	FALSE	50	4-6	0	TRUE	TRUE	TRUE	TRUE	6+	Misunderstood major points	Somewhat helpful	Somewhat fair	A Page					0.666667		1
R_e3XuvgVTaJDzZjr	Student	M	FALSE	50	4-6	0	TRUE	TRUE	TRUE	TRUE	6+	Probably didn't read it	Not at all	Somewhat fair	Half a Page					0.333333		0.666667
R_e3XuvgVTaJDzZjr	Student	M	FALSE	50	4-6	0	TRUE	TRUE	TRUE	TRUE	6+	Probably didn't read it	Somewhat helpful	Somewhat fair	Half a Page					0.333333		0.666667
R_e3XuvgVTaJDzZjr	Student	M	FALSE	50	4-6	0	TRUE	TRUE	TRUE	TRUE	6+	Missed some minor points	Very helpful	Fair	A Page					0.333333		0.666667
R_e3XuvgVTaJDzZjr	Student	M	FALSE	50	4-6	0	TRUE	TRUE	TRUE	TRUE	6+	Misunderstood major points	Somewhat helpful	Fair	A Page					0.666667		0
R_232EVrjBFKrZt6r	Assistant Professor	M	FALSE	53	4-6	0	FALSE	TRUE	TRUE	TRUE	3	Perfectly	Somewhat helpful	Fair	A Page	0.75						0.666667
R_232EVrjBFKrZt6r	Assistant Professor	M	FALSE	53	4-6	0	FALSE	TRUE	TRUE	TRUE	3	Missed some minor points	Somewhat helpful	Somewhat fair	1-2 Paragraphs	0.5						0.666667
R_232EVrjBFKrZt6r	Assistant Professor	M	FALSE	53	4-6	0	FALSE	TRUE	TRUE	TRUE	3	Missed some minor points	Not at all	Somewhat fair	1-2 Paragraphs	0.75						0.666667
R_3kpKWFVoW2nbXMp				45
R_3j1CRlaaOD9HVNN	Industry Researcher	M	FALSE	54	10-12	2	TRUE	FALSE			5	Missed some minor points	Somewhat helpful	Somewhat fair	Multiple Pages	0.25						1
R_3j1CRlaaOD9HVNN	Industry Researcher	M	FALSE	54	10-12	2	TRUE	FALSE			5	Perfectly	Somewhat helpful	Fair	A Page	0.75						0.666667
R_3j1CRlaaOD9HVNN	Industry Researcher	M	FALSE	54	10-12	2	TRUE	FALSE			5	Missed some minor points	Somewhat helpful	Fair	Half a Page	0.75						0.666667
R_3j1CRlaaOD9HVNN	Industry Researcher	M	FALSE	54	10-12	2	TRUE	FALSE			5	Perfectly	Somewhat helpful	Fair	A Page	0.5						0.666667
R_3j1CRlaaOD9HVNN	Industry Researcher	M	FALSE	54	10-12	2	TRUE	FALSE			5	Perfectly	Somewhat helpful	Fair	A Page	0.75						0.333333
R_sBfVhFDwKn1vxO9	Student	M	TRUE	54	7-9	2	TRUE	FALSE			5	Perfectly	Very helpful	Fair	Multiple Pages	0.5						0.666667
R_sBfVhFDwKn1vxO9	Student	M	TRUE	54	7-9	2	TRUE	FALSE			5	Missed some minor points	Somewhat helpful	Fair	Half a Page	1						0.666667
R_sBfVhFDwKn1vxO9	Student	M	TRUE	54	7-9	2	TRUE	FALSE			5	Perfectly	Not at all	Somewhat fair	Multiple Pages	0.25						0.666667
R_sBfVhFDwKn1vxO9	Student	M	TRUE	54	7-9	2	TRUE	FALSE			5	Perfectly	Somewhat helpful	Fair	A Page	1						1
R_sBfVhFDwKn1vxO9	Student	M	TRUE	54	7-9	2	TRUE	FALSE			5	Misunderstood major points	Not at all	Fair	Half a Page	0.5						0.666667
R_22JM959ZYSkxxhp	Professor	M	FALSE	49	4-6	0	FALSE	FALSE			6+
R_2TB3koqpDqiqsSx	Assistant Professor	M	TRUE	14	>12	1	TRUE	TRUE	TRUE	TRUE	5	Missed some minor points	Not at all	Fair	1-2 Paragraphs
R_qIRM91Wuqlr1aUx	Student	M	TRUE	49	4-6	0	TRUE	FALSE			4
R_32Ws3oi06ljMENN	Student	M	FALSE	7	10-12	3	TRUE	TRUE	TRUE	TRUE	3	Missed some minor points	Somewhat helpful	Fair	A Page	0.5						1
R_32Ws3oi06ljMENN	Student	M	FALSE	7	10-12	3	TRUE	TRUE	TRUE	TRUE	3	Perfectly	Somewhat helpful	Fair	Half a Page	0.75						0.666667
R_32Ws3oi06ljMENN	Student	M	FALSE	7	10-12	3	TRUE	TRUE	TRUE	TRUE	3	Perfectly	Not at all	Fair	A Page	0.5						0.333333
R_1QoQa2fx6slIukR				40
R_26bdS4DQmTe05b9	Student		TRUE	39	7-9	0	TRUE	TRUE	TRUE	TRUE	4	Probably didn't read it	Not at all	Fair	1-2 Paragraphs
R_1LGbE8tvDWJp6Ub	Professor	F	TRUE	43	>12	1	TRUE	TRUE	TRUE	TRUE	5
R_1g5fTAOTu2DP0Za	Student	M	FALSE	47	1-3	1	FALSE	TRUE	TRUE	TRUE	3	Missed some minor points	Somewhat helpful	Fair	A Page	0.75	0.75	0.75	0.75	0.75	1	0.75
R_1g5fTAOTu2DP0Za	Student	M	FALSE	47	1-3	1	FALSE	TRUE	TRUE	TRUE	3	Perfectly	Very helpful	Fair	A Page	0.75	0.5	0.75	0.75	0.75	0.75	0.75
R_1g5fTAOTu2DP0Za	Student	M	FALSE	47	1-3	1	FALSE	TRUE	TRUE	TRUE	3	Missed some minor points	Somewhat helpful	Fair	A Page	0.5	0.5	0.5	0.75	0.5	0.5	0.5
R_4G8zbOOa9Mi8rV7				4
R_12yhfJWeLAZbMMD	Student	M	FALSE	19	4-6	1	FALSE	TRUE	TRUE	TRUE	4	Perfectly	Very helpful	Fair	A Page	0.666667	1	0.666667	1	1	1	0.666667
R_12yhfJWeLAZbMMD	Student	M	FALSE	19	4-6	1	FALSE	TRUE	TRUE	TRUE	4	Perfectly	Somewhat helpful	Fair	1-2 Paragraphs	1	1	1	1	0.666667	0.666667	1
R_12yhfJWeLAZbMMD	Student	M	FALSE	19	4-6	1	FALSE	TRUE	TRUE	TRUE	4	Perfectly	Somewhat helpful	Fair	1-2 Paragraphs	1	0.666667	0.666667	1	1	1	0.666667
R_12yhfJWeLAZbMMD	Student	M	FALSE	19	4-6	1	FALSE	TRUE	TRUE	TRUE	4	Missed some minor points	Somewhat helpful	Somewhat fair	1-2 Paragraphs	0.333333	0.333333	1	0.666667	0.333333	0.666667	0.666667
R_2awrPQeIEiKxUpc	Professor	M	TRUE	52	1-3	0	TRUE	FALSE			3
R_br9unV36szoY849	Student	M	TRUE	49	4-6	0	TRUE	FALSE			4
R_2AYBgp0lUEPpzY9	Industry Researcher	M	FALSE	40	10-12	0	TRUE	FALSE			3
R_3n6DQJVUdfdcmJo	Government Researcher	M	TRUE	19	>12	0	TRUE	TRUE	TRUE	TRUE	3	Missed some minor points	Somewhat helpful	Fair	1-2 Paragraphs	0.75
R_3n6DQJVUdfdcmJo	Government Researcher	M	TRUE	19	>12	0	TRUE	TRUE	TRUE	TRUE	3	Perfectly	Somewhat helpful	Fair	1-2 Paragraphs	0.75
R_3n6DQJVUdfdcmJo	Government Researcher	M	TRUE	19	>12	0	TRUE	TRUE	TRUE	TRUE	3	Missed some minor points	Somewhat helpful	Fair	1-2 Paragraphs	0.75
R_afVF8jWyxVPWFpL	Student	M	FALSE	12	>12	2	TRUE	FALSE			5
R_3HLURzhatPqnXuK	Student	M	FALSE	55	4-6	0	FALSE	TRUE	TRUE	TRUE	5
R_1jHcTNeV0qjkNtp	Student	M	FALSE	38
R_0cZsdla6it6hUfD	Industry Researcher	M	TRUE	2			TRUE
R_27drceS4WUAcbSQ	Associate Professor	M	FALSE	52	1-3	0	FALSE	FALSE			6+	Perfectly	Somewhat helpful	Fair	Half a Page
R_1l5AK6WFZiWy2hG				14
R_78sxiVhLVNRWRXz	Government Researcher	M	TRUE	40	10-12	1	TRUE	TRUE	TRUE	TRUE	2	Missed some minor points	Somewhat helpful	Fair	A Page
R_24v9by9ur4gMKc1				54
R_3Pw2JJIoN5dbg0p	Student	M	FALSE	46	4-6	0	FALSE	FALSE			3	Missed some minor points	Somewhat helpful	Somewhat fair	1-2 Paragraphs	0.5	0.5	0.5	0.5	0.75	0.5	0.5
R_3Pw2JJIoN5dbg0p	Student	M	FALSE	46	4-6	0	FALSE	FALSE			3	Missed some minor points	Somewhat helpful	Somewhat fair	1-2 Paragraphs	0.25	0.5	0.5	0.5	0.5	0.5	0.5
R_3Pw2JJIoN5dbg0p	Student	M	FALSE	46	4-6	0	FALSE	FALSE			3	Missed some minor points	Somewhat helpful	Somewhat fair	1-2 Paragraphs	0.5	0.5	0.5	0.5	0.75	0.5	0.5
R_3HUh4ZyRoaUQbma	Associate Professor	F	FALSE	18	>12	2	FALSE	TRUE	TRUE	TRUE	3	Perfectly	Very helpful	Fair	A Page
R_0VZueHQ2z2q6iWt	Student	M	FALSE	33	1-3	0	TRUE	FALSE			3
R_PHtwYK8caDytA41	Student	M	TRUE	26	10-12	0	TRUE	TRUE	TRUE	TRUE	6+
R_3D74rSJrzyMKayh	Student	M	FALSE	16	7-9	1	FALSE	TRUE	TRUE	TRUE	5
R_24eH5qkThDUvBVP	Student	M	FALSE	51	4-6	0	TRUE	TRUE	TRUE	TRUE	3	Perfectly	Very helpful	Fair	1-2 Paragraphs	0.75						0.333333
R_24eH5qkThDUvBVP	Student	M	FALSE	51	4-6	0	TRUE	TRUE	TRUE	TRUE	3	Perfectly	Very helpful	Fair	1-2 Paragraphs	0.5						0
R_24eH5qkThDUvBVP	Student	M	FALSE	51	4-6	0	TRUE	TRUE	TRUE	TRUE	3	Perfectly	Very helpful	Fair	1-2 Paragraphs	0.5						0.333333
R_31u95GQU7x7eoyZ	Student	M	FALSE	49	7-9	0	TRUE	FALSE			6+
R_3IQ63HFACe8LBhw	Industry Researcher	M	TRUE	20			TRUE
R_1gBig0y8dKrTZaR	Industry Researcher	M	FALSE	34	4-6	0	TRUE	TRUE	TRUE	TRUE	5
R_1jOZye3bXaOYQXU	Student	M	TRUE	16	10-12	0	TRUE	FALSE			4
R_p9Itxqg45qsIEP7	Student	M	FALSE	11	4-6	0	FALSE	FALSE			4
R_PwxP0yJDYAIkrEB	Assistant Professor	M	TRUE	54	4-6	0	TRUE	FALSE			4
R_UXzjWw43h3kqPrX	Associate Professor		TRUE	37	>12	2	TRUE	TRUE	TRUE	TRUE	4	Misunderstood major points	Somewhat helpful	Fair	Half a Page	0.75	0.5					0.666667
R_UXzjWw43h3kqPrX	Associate Professor		TRUE	37	>12	2	TRUE	TRUE	TRUE	TRUE	4	Missed some minor points	Somewhat helpful	Fair	A Page	0.5	0.5					0.666667
R_UXzjWw43h3kqPrX	Associate Professor		TRUE	37	>12	2	TRUE	TRUE	TRUE	TRUE	4	Missed some minor points	Very helpful	Fair	Multiple Pages	0.75	0.5					0.666667
R_UXzjWw43h3kqPrX	Associate Professor		TRUE	37	>12	2	TRUE	TRUE	TRUE	TRUE	4	Missed some minor points	Very helpful	Fair	Multiple Pages	0.5	0.5					0.333333
R_UXzjWw43h3kqPrX	Associate Professor		TRUE	26	>12	1	TRUE	TRUE	TRUE	TRUE	6+	Missed some minor points	Somewhat helpful	Fair	A Page	1	0.666667	1	1	1		0.333333
R_UXzjWw43h3kqPrX	Associate Professor		TRUE	26	>12	1	TRUE	TRUE	TRUE	TRUE	6+	Perfectly	Very helpful	Fair	Multiple Pages	0.5	0.25	0.25	0.25	0.5		0.5
R_UXzjWw43h3kqPrX	Associate Professor		TRUE	26	>12	1	TRUE	TRUE	TRUE	TRUE	6+	Missed some minor points	Very helpful	Fair	A Page	1	0.666667	1	1	1		0.666667
R_UXzjWw43h3kqPrX	Associate Professor		TRUE	26	>12	1	TRUE	TRUE	TRUE	TRUE	6+	Misunderstood major points	Somewhat helpful	Fair	A Page	0.5	0.666667	0.666667	0.666667	0.666667		0.333333
R_UXzjWw43h3kqPrX	Associate Professor		TRUE	26	>12	1	TRUE	TRUE	TRUE	TRUE	6+	Missed some minor points	Very helpful	Fair	A Page	0.25	0.666667	0.333333	0.666667	0.333333		1
R_UXzjWw43h3kqPrX	Associate Professor		TRUE	26	>12	1	TRUE	TRUE	TRUE	TRUE	6+	Missed some minor points	Very helpful	Fair	Multiple Pages	0.5	0.333333	0.333333	0.666667	0.666667		0.666667
R_3L0jiIVNELVZwZc	Professor	M	TRUE	43			TRUE
R_1CljC9UVc0k21qu	Student		FALSE	21	7-9	0	TRUE	TRUE	TRUE	TRUE	3
R_3OovJUaqZd93k54	Student	M	FALSE	42	7-9	0	TRUE	TRUE	TRUE	TRUE	3
R_21GQyzQRLMdWbg4	Industry Researcher	M	TRUE	33	4-6	0	TRUE	FALSE			4
R_dbduOnhtdeSuUFz	Student	F	FALSE	53	4-6	0	FALSE	TRUE	TRUE	TRUE	3	Perfectly	Very helpful	Fair	A Page	0.75						0.666667
R_dbduOnhtdeSuUFz	Student	F	FALSE	53	4-6	0	FALSE	TRUE	TRUE	TRUE	3	Perfectly	Very helpful	Fair	A Page	0.5						0.333333
R_dbduOnhtdeSuUFz	Student	F	FALSE	53	4-6	0	FALSE	TRUE	TRUE	TRUE	3	Perfectly	Somewhat helpful	Fair	Half a Page	0.75						0.666667
R_3NJW5UyCs1f5GQS	Industry Researcher	M	FALSE	26	4-6	0	TRUE	TRUE	TRUE	TRUE	6+	Missed some minor points	Somewhat helpful	Fair	Multiple Pages	0.666667	0.333333	0	0.333333	0.666667		0
R_3NJW5UyCs1f5GQS	Industry Researcher	M	FALSE	26	4-6	0	TRUE	TRUE	TRUE	TRUE	6+	Misunderstood major points	Not at all	Somewhat fair	A Page	0.666667	0.666667	0.333333	1	0.333333		0.333333
R_3NJW5UyCs1f5GQS	Industry Researcher	M	FALSE	26	4-6	0	TRUE	TRUE	TRUE	TRUE	6+	Misunderstood major points	Not at all	Unfair	A Page	0	0.333333	0.666667	0.666667	0.333333		1
R_3NJW5UyCs1f5GQS	Industry Researcher	M	FALSE	26	4-6	0	TRUE	TRUE	TRUE	TRUE	6+	Misunderstood major points	Not at all	Somewhat fair	Half a Page	0.666667	0.666667	0.666667	0.666667	0.666667		0
R_3NJW5UyCs1f5GQS	Industry Researcher	M	FALSE	26	4-6	0	TRUE	TRUE	TRUE	TRUE	6+	Perfectly	Somewhat helpful	Fair	Multiple Pages	1	0.333333	0.666667	1	1		0.666667
R_3NJW5UyCs1f5GQS	Industry Researcher	M	FALSE	26	4-6	0	TRUE	TRUE	TRUE	TRUE	6+	Missed some minor points	Somewhat helpful	Fair	A Page	1	0.666667	0.666667	1	0.666667		0.666667
R_3KO6ESig3QO5Y0E	Professor	M	TRUE	53	4-6	1	TRUE	TRUE	TRUE	TRUE	4
R_30bZVHEC8Ha5AyO	Industry Researcher	M	TRUE	48	>12	0	TRUE	FALSE			6+	Perfectly	Very helpful	Fair	Multiple Pages	1	1	1	1	1	1
R_30bZVHEC8Ha5AyO	Industry Researcher	M	TRUE	48	>12	0	TRUE	FALSE			6+	Perfectly	Somewhat helpful	Fair	Half a Page	0.333333	0.5	0.5	0.5	0.75	1
R_30bZVHEC8Ha5AyO	Industry Researcher	M	TRUE	48	>12	0	TRUE	FALSE			6+	Perfectly	Somewhat helpful	Fair	Half a Page	0.5	0.5	0.25	0.75	1	1
R_30bZVHEC8Ha5AyO	Industry Researcher	M	TRUE	48	>12	0	TRUE	FALSE			6+	Missed some minor points	Somewhat helpful	Fair	Half a Page	1	0.75	1	0.75	1	1
R_30bZVHEC8Ha5AyO	Industry Researcher	M	TRUE	48	>12	0	TRUE	FALSE			6+	Perfectly	Somewhat helpful	Fair	1-2 Paragraphs	0.833333	0.5	1	0.5	0.75	1
R_3Kp7Lpfqk9ZohEO	Student		FALSE	22	4-6	0	FALSE	TRUE	TRUE	TRUE	4	Missed some minor points	Very helpful	Fair	A Page
R_278aAGtqU4XwcDi	Industry Researcher	M	TRUE	33	1-3	0	TRUE	FALSE			3	Perfectly	Very helpful	Fair	Multiple Pages	1	1	1		0.666667		0.333333
R_278aAGtqU4XwcDi	Industry Researcher	M	TRUE	33	1-3	0	TRUE	FALSE			3	Perfectly	Not at all	Fair	1-2 Paragraphs	1	0.666667	1		0.666667		0.666667
R_278aAGtqU4XwcDi	Industry Researcher	M	TRUE	33	1-3	0	TRUE	FALSE			3	Perfectly	Somewhat helpful	Fair	Half a Page	1	1	1		0.666667		0.666667
R_278aAGtqU4XwcDi	Industry Researcher	M	TRUE	26	>12	0	TRUE	TRUE	TRUE	TRUE	6+	Missed some minor points	Somewhat helpful	Fair	Multiple Pages	0.75	1	0.666667	1	1		0.333333
R_278aAGtqU4XwcDi	Industry Researcher	M	TRUE	26	>12	0	TRUE	TRUE	TRUE	TRUE	6+	Missed some minor points	Somewhat helpful	Fair	A Page	1	0.666667	1	0.666667	1		0.666667
R_278aAGtqU4XwcDi	Industry Researcher	M	TRUE	26	>12	0	TRUE	TRUE	TRUE	TRUE	6+	Missed some minor points	Very helpful	Fair	Multiple Pages	0.5	0.333333	0.333333	1	0.666667
R_278aAGtqU4XwcDi	Industry Researcher	M	TRUE	26	>12	0	TRUE	TRUE	TRUE	TRUE	6+	Missed some minor points	Not at all	Somewhat fair	A Page	0.5	0.333333	0.333333	1	0.666667		1
R_278aAGtqU4XwcDi	Industry Researcher	M	TRUE	26	>12	0	TRUE	TRUE	TRUE	TRUE	6+	Missed some minor points	Somewhat helpful	Fair	Multiple Pages	0.5	0.666667	0.333333	1	0.666667
R_278aAGtqU4XwcDi	Industry Researcher	M	TRUE	26	>12	0	TRUE	TRUE	TRUE	TRUE	6+	Misunderstood major points	Not at all	Unfair	Multiple Pages	0	0.666667	0.666667	1	0
R_3kbpcgMaAmioGhj				21
R_Wv2C8D31eQNLDfb	Industry Researcher	M	TRUE	43	7-9	0	TRUE	FALSE			5
R_2urLjgw96a2n0Po	Assistant Professor	M	FALSE	20	4-6	0	TRUE	TRUE	TRUE	TRUE	5	Perfectly	Somewhat helpful	Somewhat fair	1-2 Paragraphs
R_3PFFThiOvdrhqKo	Industry Researcher	F	TRUE	30			TRUE
R_2PdurjpdYVqU76Z	Student	M	FALSE	48	4-6	0	FALSE	FALSE			3
R_1I9RkBT4cJ0vshE	Professor	M	FALSE	50	>12	3	FALSE	TRUE	TRUE	TRUE	5
R_3psWDXu8FnSkk7S	Student	F	FALSE	56	>12	1	TRUE	TRUE	TRUE	TRUE	3	Missed some minor points	Very helpful	Fair	A Page
R_31bY7epwZeKE0IA	Industry Researcher	M	TRUE	21	10-12	0	TRUE	FALSE			6+	Perfectly	Somewhat helpful	Fair	A Page
R_10Ytw6tuJFOwDpr	Professor	M	TRUE	21	>12	0	TRUE	TRUE	TRUE	TRUE	6+
R_ABboqawDWihgkMx	Professor	M	FALSE	34	>12	0	FALSE	FALSE			3
R_1H6QiJG00tXNEH8	Industry Researcher	M	TRUE	26	10-12	1	TRUE	TRUE	TRUE	FALSE	6+	Missed some minor points	Somewhat helpful	Fair	Multiple Pages
R_22xdPoKLBiWwl4K	Student	M	FALSE	52	10-12	1	FALSE	TRUE	TRUE	TRUE	5	Missed some minor points	Not at all	Fair	1-2 Paragraphs
R_SQ6i3y5HilmE5jP	Student	M	FALSE	10	>12	0	FALSE	FALSE			5	Missed some minor points	Very helpful	Fair	Multiple Pages	0.333333	0.333333	0	0.333333	0	1	0.333333
R_SQ6i3y5HilmE5jP	Student	M	FALSE	10	>12	0	FALSE	FALSE			5	Missed some minor points	Somewhat helpful	Somewhat fair	A Page	0.333333	0.666667	0.333333	0	0.333333	1	0
R_SQ6i3y5HilmE5jP	Student	M	FALSE	10	>12	0	FALSE	FALSE			5	Perfectly	Very helpful	Fair	A Page	1	0.666667	0.333333	0.666667	0.666667	1	1
R_SQ6i3y5HilmE5jP	Student	M	FALSE	10	>12	0	FALSE	FALSE			5	Missed some minor points	Somewhat helpful	Fair	A Page	0.666667	1	0.333333	1	0.666667	1	0.666667
R_SQ6i3y5HilmE5jP	Student	M	FALSE	10	>12	0	FALSE	FALSE			5	Missed some minor points	Somewhat helpful	Fair	A Page	0.333333	0.333333	0.333333	0	0.333333	1	0.333333
R_3g0lLcE73RQP72c	Assistant Professor	M	TRUE	49	7-9	0	TRUE	FALSE			6+
R_332nsdi626ZXTwc	Postdoctoral Researcher	M	FALSE	47	4-6	7	FALSE	FALSE			4
R_1Q3mssE6AMf7bTy	Student		FALSE	53	4-6	0	FALSE	TRUE	TRUE	TRUE	3	Perfectly	Very helpful	Fair	A Page	0.666667	0.666667	1	0.666667	1	1	0.666667
R_1Q3mssE6AMf7bTy	Student		FALSE	53	4-6	0	FALSE	TRUE	TRUE	TRUE	3	Missed some minor points	Somewhat helpful	Fair	Half a Page	0.333333	0.666667	0.666667	0.666667	1	1	0.333333
R_1Q3mssE6AMf7bTy	Student		FALSE	53	4-6	0	FALSE	TRUE	TRUE	TRUE	3	Missed some minor points	Very helpful	Fair	A Page	0	0.333333	0.666667	0.333333	0.333333	0.333333	0
R_33qoceEl3SuscL4	Assistant Professor	M	TRUE	7	4-6	0	TRUE	TRUE	TRUE	TRUE	3	Perfectly	Somewhat helpful	Fair	Half a Page
R_3kEXMXSztlRdSzv	Professor	M	FALSE	14
R_3F2TXYBF46gX0Z5	Government Researcher	M	TRUE	1	10-12	0	TRUE	TRUE	FALSE	TRUE	3
R_31GlULQXTvfYWlj	Associate Professor	M	FALSE	23	>12	1	FALSE	FALSE			3
R_3nSJI14WlXejL14	Professor	M	FALSE	34	>12	2	FALSE	TRUE	TRUE	FALSE	5
R_pLdfF4VdDWcOVu9	Student	M	FALSE	1	4-6	0	TRUE	FALSE			4	Perfectly	Very helpful	Fair	A Page
R_1K12u4blb1CJtCR	Assistant Professor	M	FALSE	36	10-12	1	TRUE	FALSE			5
R_2bHrECiMXZdyaJE	Student		FALSE	14
R_3R442ww9SNz363P	Student	M	FALSE	10	>12	2	FALSE	TRUE	TRUE	TRUE	5	Perfectly	Very helpful	Fair	A Page		0.25		0.666667	0.333333	0	0.333333
R_3R442ww9SNz363P	Student	M	FALSE	10	>12	2	FALSE	TRUE	TRUE	TRUE	5	Perfectly	Somewhat helpful	Fair	A Page		0.5		0.333333	0.666667	0	0.666667
R_3R442ww9SNz363P	Student	M	FALSE	10	>12	2	FALSE	TRUE	TRUE	TRUE	5	Missed some minor points	Somewhat helpful	Fair	A Page		0.25		0.666667	0.666667	0.333333	0.666667
R_3R442ww9SNz363P	Student	M	FALSE	10	>12	2	FALSE	TRUE	TRUE	TRUE	5	Perfectly	Very helpful	Fair	Half a Page		1		0.666667	0.666667	0.666667	0.666667
R_3R442ww9SNz363P	Student	M	FALSE	10	>12	2	FALSE	TRUE	TRUE	TRUE	5	Perfectly	Somewhat helpful	Fair	Half a Page		0.75		0.666667	0.333333	0.666667	0.666667
R_2tfmaErJXbYnHPE	Assistant Professor	M	FALSE	7	4-6	0	FALSE	FALSE			3	Perfectly	Very helpful	Fair	A Page
R_2tfmaErJXbYnHPE	Assistant Professor	M	FALSE	53	10-12	3	FALSE	TRUE	TRUE	TRUE	4	Missed some minor points	Somewhat helpful	Fair	Multiple Pages
R_2tfmaErJXbYnHPE	Assistant Professor	M	FALSE	26	4-6	0	TRUE	TRUE	TRUE	TRUE	6+	Perfectly	Very helpful	Fair	Multiple Pages
R_1jwSxAK7NTXNSwQ	Government Researcher	M	TRUE	30	10-12	0	TRUE	TRUE	TRUE	TRUE	5
R_2whoFFFRKlM6czP	Associate Professor	F	TRUE	14	>12	3	TRUE	TRUE	TRUE	FALSE	5
R_1dm1iEN5hqa4Fge	Assistant Professor	M	FALSE	31	4-6	0	FALSE	TRUE	TRUE	TRUE	5	Missed some minor points	Very helpful	Somewhat fair	A Page
R_poStlaQXmnsKdIl	Assistant Professor	M	FALSE	44	>12	2	TRUE	TRUE	TRUE	FALSE	4	Perfectly	Not at all	Fair	Half a Page	1
R_poStlaQXmnsKdIl	Assistant Professor	M	FALSE	44	>12	2	TRUE	TRUE	TRUE	FALSE	4	Perfectly	Not at all	Fair	Half a Page	1
R_poStlaQXmnsKdIl	Assistant Professor	M	FALSE	44	>12	2	TRUE	TRUE	TRUE	FALSE	4	Perfectly	Not at all	Fair	1-2 Paragraphs	0.833333
R_3GBQ0tuWaioVEs0	Industry Researcher	M	TRUE	2	>12	4	TRUE	TRUE	TRUE	FALSE	5	Missed some minor points	Somewhat helpful	Fair	Half a Page	0.5		0.25		0.666667		0.25
R_3GBQ0tuWaioVEs0	Industry Researcher	M	TRUE	2	>12	4	TRUE	TRUE	TRUE	FALSE	5	Perfectly	Very helpful	Fair	A Page	0.5		0.75		0.333333		0.75
R_3GBQ0tuWaioVEs0	Industry Researcher	M	TRUE	2	>12	4	TRUE	TRUE	TRUE	FALSE	5	Missed some minor points	Somewhat helpful	Fair	A Page	0.5		0.5		0.333333		0.5
R_3GBQ0tuWaioVEs0	Industry Researcher	M	TRUE	2	>12	4	TRUE	TRUE	TRUE	FALSE	5	Missed some minor points	Somewhat helpful	Fair	A Page	0.75		0.5		0.666667		0.5
R_3GBQ0tuWaioVEs0	Industry Researcher	M	TRUE	2	>12	4	TRUE	TRUE	TRUE	FALSE	5	Missed some minor points	Somewhat helpful	Fair	A Page	0.5		0.5		0.333333		0.5
R_1OotbfkINch19NX	Student	M	TRUE	34	10-12	0	TRUE	FALSE			3
R_C3IevFh7EeDpp6x	Postdoctoral Researcher	M	FALSE	34	1-3	0	FALSE	FALSE			3
R_2U4WZAROVeDSvRN	Assistant Professor	M	FALSE	54	1-3	0	TRUE	TRUE	TRUE	TRUE	5
R_2Ptk2S2BylIycZg	Student	M	FALSE	53	4-6	1	FALSE	TRUE	TRUE	FALSE	4
R_1nZvK4YWx6V8VZw	Student		TRUE	12	>12	0	TRUE	TRUE	TRUE	TRUE	4	Missed some minor points	Very helpful	Fair	A Page
R_1GWB4ft2NL6mETk	Postdoctoral Researcher		FALSE	42	>12	0	FALSE	TRUE	TRUE	TRUE	5
R_12xr182LqMtkv3z	Industry Researcher	M	FALSE	33	>12	2	FALSE	FALSE			5
R_UEAzZB7Kocp5ugx	Industry Researcher	M	FALSE	27
R_3phZ5v1TKWjuvYy	Student	M	FALSE	7	>12	6	FALSE	TRUE	TRUE	TRUE	3
R_3Hv1hLJCdGoBSjP	Associate Professor	M	FALSE	45	7-9	0	FALSE	FALSE			4	Missed some minor points	Somewhat helpful	Unfair	Half a Page
R_z8azSQG4Hu0jCdX				53
R_2huz6LuJLSgJV1D	Assistant Professor	M	FALSE	7	>12	5	FALSE	TRUE	TRUE	FALSE	4
R_1DAqKFFklDcKiMz	Associate Professor		TRUE	1	>12	0	TRUE	FALSE			3
R_2v7dLsd4EJdlP1F	Industry Researcher	F	FALSE	36	7-9	0	FALSE	TRUE	TRUE	TRUE	5	Perfectly	Very helpful	Fair	Multiple Pages
R_ePsxS5XsBLiLvk5	Professor	M	FALSE	5
R_2wAnCpygaLVYYpi	Government Researcher	M	TRUE	23	>12	1	TRUE	FALSE			4	Missed some minor points	Not at all	Somewhat fair	Half a Page
R_1N3206wPTA5GAGm	Student	M	FALSE	18	>12	0	TRUE	TRUE	TRUE	TRUE	3
R_ZkPvzAzFtLAE7L3	Industry Researcher	F	FALSE	11	4-6	0	FALSE	TRUE	TRUE	TRUE	5
R_3L52YBe399AexuM	Student	M	FALSE	23	10-12	0	FALSE	TRUE	TRUE	TRUE	3	Missed some minor points	Somewhat helpful	Somewhat fair	A Page	1	1	1	1	1	1	1
R_3L52YBe399AexuM	Student	M	FALSE	23	10-12	0	FALSE	TRUE	TRUE	TRUE	3	Misunderstood major points	Not at all	Unfair	A Page	0.666667	0.666667	0.666667	0.666667	0.666667	0.666667	0.666667
R_3L52YBe399AexuM	Student	M	FALSE	23	10-12	0	FALSE	TRUE	TRUE	TRUE	3	Perfectly	Very helpful	Fair	Half a Page	0.333333	0.333333	0.333333	0.333333	0.333333	0.333333	0.333333
R_2783u7AXwc3eX2E	Industry Researcher	M	TRUE	54			TRUE
R_YPH4KmXPcYxhN0l				50
R_3foNYwkTxSDmFY9	Professor		FALSE	7	7-9	0	FALSE	FALSE			3	Perfectly	Very helpful	Fair	A Page	0.5						0.333333
R_3foNYwkTxSDmFY9	Professor		FALSE	7	7-9	0	FALSE	FALSE			3	Missed some minor points	Very helpful	Fair	Half a Page	0.5						1
R_3foNYwkTxSDmFY9	Professor		FALSE	7	7-9	0	FALSE	FALSE			3	Missed some minor points	Very helpful	Fair	Half a Page	0.5						0.333333
R_2cBAn8Uu0VvVZST	Associate Professor	M	FALSE	2	7-9	2	TRUE	TRUE	TRUE	FALSE	4	Missed some minor points	Somewhat helpful	Somewhat fair	1-2 Paragraphs	0.75	0.75	0.5	0.75	0.75	0.75	0.75
R_2cBAn8Uu0VvVZST	Associate Professor	M	FALSE	2	7-9	2	TRUE	TRUE	TRUE	FALSE	4	Probably didn't read it	Not at all	Somewhat fair	1-2 Paragraphs	0.5	0.5	0.5	0.5	0.25	0.5	0.5
R_2cBAn8Uu0VvVZST	Associate Professor	M	FALSE	2	7-9	2	TRUE	TRUE	TRUE	FALSE	4	Perfectly	Very helpful	Fair	Half a Page	0.5	0.75	0.75	0.75	0.75	0.75	0.75
R_2cBAn8Uu0VvVZST	Associate Professor	M	FALSE	2	7-9	2	TRUE	TRUE	TRUE	FALSE	4	Missed some minor points	Somewhat helpful	Somewhat fair	1-2 Paragraphs							0.75
R_2cBAn8Uu0VvVZST	Associate Professor	M	FALSE	30	4-6	0	TRUE	TRUE	TRUE	TRUE	4	Missed some minor points	Somewhat helpful	Somewhat fair	Half a Page	0.75	0.5	0.75	0.5	0.75	0.75	0.75
R_2cBAn8Uu0VvVZST	Associate Professor	M	FALSE	30	4-6	0	TRUE	TRUE	TRUE	TRUE	4	Missed some minor points	Very helpful	Fair	Half a Page	0.75	0.75	0.5	0.75	0.75	0.75	0.75
R_2cBAn8Uu0VvVZST	Associate Professor	M	FALSE	30	4-6	0	TRUE	TRUE	TRUE	TRUE	4	Missed some minor points	Very helpful	Somewhat fair	Half a Page	0.75	0.75	0.75	0.75	0.5	0.5	0.75
R_2cBAn8Uu0VvVZST	Associate Professor	M	FALSE	30	4-6	0	TRUE	TRUE	TRUE	TRUE	4	Missed some minor points	Not at all	Somewhat fair	1-2 Paragraphs	0.25	0.5	0.5	0.5	0.75	0.5	0.5
R_XIeYfQgYW3FZpWF	Assistant Professor	M	TRUE	16			TRUE
R_1r0rbR0aO5TyoXb	Industry Researcher	M	FALSE	16	10-12	1	FALSE	FALSE			4	Perfectly	Very helpful	Fair	A Page	1	1	1	1	1	0.333333	1
R_1r0rbR0aO5TyoXb	Industry Researcher	M	FALSE	16	10-12	1	FALSE	FALSE			4	Misunderstood major points	Not at all	Unfair	Half a Page	0.333333	0.333333	0.333333	0.333333	0.333333	0.333333	0.333333
R_1r0rbR0aO5TyoXb	Industry Researcher	M	FALSE	16	10-12	1	FALSE	FALSE			4	Perfectly	Very helpful	Fair	A Page	0.666667	0.666667	0.666667	0.666667	0.666667	0.666667	0.666667
R_1r0rbR0aO5TyoXb	Industry Researcher	M	FALSE	16	10-12	1	FALSE	FALSE			4	Missed some minor points	Somewhat helpful	Somewhat fair	Multiple Pages	0.333333	0.333333	0.333333	0.333333	0.333333	0.333333	0.333333
R_2qwHXLNT2C6povG	Student	M	TRUE	26	>12	1	TRUE	TRUE	TRUE	TRUE	6+
R_2tioKUMerru8UBv	Professor	M	FALSE	39	10-12	1	FALSE	TRUE	TRUE	TRUE	4	Perfectly	Very helpful	Fair	A Page
R_3qBDYo4KbU7Z8ST	Student	M	FALSE	48	1-3	0	FALSE	FALSE			3	Missed some minor points	Somewhat helpful	Fair	Half a Page	0.833333	0.75	0.75	0.75	0.75	1
R_3qBDYo4KbU7Z8ST	Student	M	FALSE	48	1-3	0	FALSE	FALSE			3	Perfectly	Very helpful	Fair	A Page	0.5	0.75	0.5	0.25	0.5	1
R_3qBDYo4KbU7Z8ST	Student	M	FALSE	48	1-3	0	FALSE	FALSE			3	Missed some minor points	Somewhat helpful	Fair	1-2 Paragraphs	1	1	1	1	1	1
R_3qBDYo4KbU7Z8ST	Student	M	FALSE	48	4-6	0	FALSE	FALSE			3	Perfectly	Very helpful	Fair	Half a Page	0.833333	0.75	0.75	0.75	0.75	0.75
R_3qBDYo4KbU7Z8ST	Student	M	FALSE	48	4-6	0	FALSE	FALSE			3	Missed some minor points	Not at all	Fair	1-2 Paragraphs	0.833333	0.75	0.75	0.75	0.75	1
R_3qBDYo4KbU7Z8ST	Student	M	FALSE	48	4-6	0	FALSE	FALSE			3	Missed some minor points	Very helpful	Fair	A Page	0.666667	0.75	0.75	0.75	0.75	1
R_3ml2BRvhSEseE4t				30
R_AHElJyIoC4a4djj	Student	F	FALSE	53	4-6	0	FALSE	TRUE	TRUE	TRUE	3	Perfectly	Very helpful	Fair	Multiple Pages	0.5	0.75	0.25	0.75	1	0.75	0.5
R_AHElJyIoC4a4djj	Student	F	FALSE	53	4-6	0	FALSE	TRUE	TRUE	TRUE	3	Missed some minor points	Somewhat helpful	Fair	Half a Page	0.5	0.75	0.5	0.5	0.5	0.75	0.5
R_AHElJyIoC4a4djj	Student	F	FALSE	53	4-6	0	FALSE	TRUE	TRUE	TRUE	3	Missed some minor points	Somewhat helpful	Fair	A Page	0.25	0.5	0.25	0.25	0.75	0.75	0.5
R_1F3TTDE9UnVd3Ut	Assistant Professor	M	FALSE	45	>12	0	FALSE	TRUE	TRUE	TRUE	4	Missed some minor points	Very helpful	Fair	A Page	0.166667
R_1F3TTDE9UnVd3Ut	Assistant Professor	M	FALSE	45	>12	0	FALSE	TRUE	TRUE	TRUE	4	Perfectly	Somewhat helpful	Fair	Half a Page	0.333333
R_1F3TTDE9UnVd3Ut	Assistant Professor	M	FALSE	45	>12	0	FALSE	TRUE	TRUE	TRUE	4	Perfectly	Not at all	Fair	Half a Page	0.833333
R_1F3TTDE9UnVd3Ut	Assistant Professor	M	FALSE	45	>12	0	FALSE	TRUE	TRUE	TRUE	4	Perfectly	Somewhat helpful	Fair	Half a Page	0.666667
R_3J3hU4ZD3ve5ch2	Professor	M	TRUE	50	7-9	0	TRUE	TRUE	TRUE	TRUE	4	Missed some minor points	Somewhat helpful	Fair	A Page
R_OBEUoOzT4DlXVCN	Student	F	FALSE	30	4-6	1	FALSE	TRUE	TRUE	TRUE	5	Perfectly	Very helpful	Fair	A Page	0.25	0.5	0.75	0.5	0.75	0.5	0.25
R_OBEUoOzT4DlXVCN	Student	F	FALSE	30	4-6	1	FALSE	TRUE	TRUE	TRUE	5	Perfectly	Very helpful	Fair	Multiple Pages	0.5	0.5	0.75	0.5	0.75	0.75	0.5
R_OBEUoOzT4DlXVCN	Student	F	FALSE	30	4-6	1	FALSE	TRUE	TRUE	TRUE	5	Perfectly	Very helpful	Fair	Multiple Pages	0.25	0.75	0.75	0.25	0.75	0.75	0.5
R_OBEUoOzT4DlXVCN	Student	F	FALSE	30	4-6	1	FALSE	TRUE	TRUE	TRUE	5	Perfectly	Very helpful	Fair	A Page	0.5	0.5	0.25	0.5	0.5	0.5	0.5
R_OBEUoOzT4DlXVCN	Student	F	FALSE	30	4-6	1	FALSE	TRUE	TRUE	TRUE	5	Perfectly	Very helpful	Fair	A Page	0.75	0.75	1	0.5	0.5	0.5	0.5
R_1r1WIHbWfVX8DTM	Assistant Professor	M	FALSE	12	>12	1	FALSE	FALSE			6+	Perfectly	Very helpful	Fair	A Page	0.75
R_1r1WIHbWfVX8DTM	Assistant Professor	M	FALSE	12	>12	1	FALSE	FALSE			6+	Perfectly	Somewhat helpful	Fair	Half a Page	0.5
R_1r1WIHbWfVX8DTM	Assistant Professor	M	FALSE	12	>12	1	FALSE	FALSE			6+	Perfectly	Very helpful	Fair	A Page	0.25
R_1r1WIHbWfVX8DTM	Assistant Professor	M	FALSE	12	>12	1	FALSE	FALSE			6+	Perfectly	Very helpful	Fair	A Page	0.5
R_1r1WIHbWfVX8DTM	Assistant Professor	M	FALSE	12	>12	1	FALSE	FALSE			6+	Perfectly	Somewhat helpful	Fair	Half a Page	0.5
R_1r1WIHbWfVX8DTM	Assistant Professor	M	FALSE	12	>12	1	FALSE	FALSE			6+	Perfectly	Somewhat helpful	Fair	Half a Page	0.5
R_1IWsGL5A8s0pN5p	Assistant Professor	M	FALSE	53	10-12	1	FALSE	TRUE	TRUE	TRUE	3	Perfectly	Very helpful	Fair	Multiple Pages	0.5						1
R_1IWsGL5A8s0pN5p	Assistant Professor	M	FALSE	53	10-12	1	FALSE	TRUE	TRUE	TRUE	3	Perfectly	Very helpful	Fair	Multiple Pages	0.5						1
R_1IWsGL5A8s0pN5p	Assistant Professor	M	FALSE	53	10-12	1	FALSE	TRUE	TRUE	TRUE	3	Perfectly	Very helpful	Fair	Multiple Pages	0.75						1
R_24pXRupDqJEXUUO	Assistant Professor	M	TRUE	10	7-9	1	TRUE	FALSE			5	Misunderstood major points	Somewhat helpful	Fair	1-2 Paragraphs
R_24pXRupDqJEXUUO	Assistant Professor	M	TRUE	51	1-3	0	TRUE	FALSE			3	Misunderstood major points	Somewhat helpful	Fair	1-2 Paragraphs
R_24pXRupDqJEXUUO	Assistant Professor	M	TRUE	8	4-6	1	TRUE	FALSE			3	Perfectly	Somewhat helpful	Somewhat fair	A Page
R_2EHanq4Gsd5Yi7y	Student	M	FALSE	2	10-12	1	TRUE	FALSE			5	Perfectly	Very helpful	Fair	A Page	0.75	1	1		0.333333		0.25
R_2EHanq4Gsd5Yi7y	Student	M	FALSE	2	10-12	1	TRUE	FALSE			5	Perfectly	Very helpful	Fair	A Page	0.5	1	1		0.333333		0.5
R_2EHanq4Gsd5Yi7y	Student	M	FALSE	2	10-12	1	TRUE	FALSE			5	Perfectly	Very helpful	Fair	A Page	0.5	0.666667	1		0.333333		0.75
R_2EHanq4Gsd5Yi7y	Student	M	FALSE	2	10-12	1	TRUE	FALSE			5	Perfectly	Very helpful	Somewhat fair	A Page	0.25	0.333333	0.666667		0.333333		1
R_2EHanq4Gsd5Yi7y	Student	M	FALSE	2	10-12	1	TRUE	FALSE			5	Perfectly	Very helpful	Fair	A Page	0.5	1	0.666667		0.333333		0.5
R_3LhDeHhCJXR75PI	Postdoctoral Researcher	F	FALSE	7	4-6	0	FALSE	FALSE			3				A Page
R_BJqeX5HMKwpgWAN	Associate Professor	M	TRUE	37	>12	1	TRUE	FALSE			4
R_1ePgSSi9IIK4740	Assistant Professor	M	FALSE	4	4-6	0	FALSE	FALSE			3
R_10ZyzUenFMo4Efn	Professor	M	FALSE	39	7-9	1	FALSE	FALSE			5
R_9twtEWo1REGKRHP	Industry Researcher	M	FALSE	31	7-9	0	TRUE	TRUE	TRUE	TRUE	6+
R_1pWMjQC3Invrx6A	Postdoctoral Researcher	M	FALSE	53	10-12	1	FALSE	TRUE	TRUE	TRUE	4	Missed some minor points	Somewhat helpful	Fair	1-2 Paragraphs	0.5						0
R_1pWMjQC3Invrx6A	Postdoctoral Researcher	M	FALSE	53	10-12	1	FALSE	TRUE	TRUE	TRUE	4	Perfectly	Very helpful	Fair	Multiple Pages	0.75						1
R_1pWMjQC3Invrx6A	Postdoctoral Researcher	M	FALSE	53	10-12	1	FALSE	TRUE	TRUE	TRUE	4	Perfectly	Very helpful	Fair	A Page	0.5						0.333333
R_1pWMjQC3Invrx6A	Postdoctoral Researcher	M	FALSE	53	10-12	1	FALSE	TRUE	TRUE	TRUE	4	Perfectly	Very helpful	Fair	A Page	0.5						0.333333
R_oZTxwHXIBkSs6t3	Government Researcher	M	FALSE	36	4-6	0	TRUE	TRUE	TRUE	TRUE	5	Perfectly	Very helpful	Fair	A Page	0.75	0.75	1	0.75	1	1	1
R_oZTxwHXIBkSs6t3	Government Researcher	M	FALSE	36	4-6	0	TRUE	TRUE	TRUE	TRUE	5	Perfectly	Very helpful	Fair	Half a Page	1	1	0.75	1	1	0.5	0.75
R_oZTxwHXIBkSs6t3	Government Researcher	M	FALSE	36	4-6	0	TRUE	TRUE	TRUE	TRUE	5	Perfectly	Very helpful	Fair	A Page	1	0.75	1	1	0.75	1	1
R_oZTxwHXIBkSs6t3	Government Researcher	M	FALSE	36	4-6	0	TRUE	TRUE	TRUE	TRUE	5	Missed some minor points	Very helpful	Fair	Half a Page	0.75	1	0.75	1	0.75	1	0.75
R_oZTxwHXIBkSs6t3	Government Researcher	M	FALSE	36	4-6	0	TRUE	TRUE	TRUE	TRUE	5	Perfectly	Very helpful	Somewhat fair	1-2 Paragraphs	0.75	1	0.75	1	1	1	1
R_yVXrzmEWMR7tey5	Professor	M	FALSE	12	7-9	0	FALSE	TRUE	TRUE	TRUE	5				A Page
R_22FEmwR2UQr9Sn6	Associate Professor	F	FALSE	18	4-6	0	FALSE	TRUE	TRUE	TRUE	3	Perfectly	Somewhat helpful	Fair	A Page
R_22FEmwR2UQr9Sn6	Associate Professor	F	FALSE	18	4-6	0	FALSE	TRUE	TRUE	TRUE	3	Perfectly	Somewhat helpful	Fair	A Page
R_22FEmwR2UQr9Sn6	Associate Professor	F	FALSE	18	4-6	0	FALSE	TRUE	TRUE	TRUE	3	Perfectly	Somewhat helpful	Fair	A Page
R_wZUpUBcW19AXQt3	Student	M	FALSE	53
R_3qfmQWdzlIo6SBH	Professor	M	TRUE	50	>12	3	TRUE	TRUE	TRUE	TRUE	5
R_2S6r2xIPpLfXpb7	Assistant Professor		FALSE	16	7-9	1	FALSE	FALSE			5	Missed some minor points	Very helpful	Fair	A Page
R_3qaR6SnF3UrYana	Student	M	FALSE	53
R_RCwJoNzS5zYbV97	Student	M	FALSE	12	10-12	1	FALSE	TRUE	TRUE	TRUE	3	Missed some minor points	Very helpful	Fair	Multiple Pages
R_25Gk8yOkXlJ4O9L	Professor	M	FALSE	22	>12	1	FALSE	FALSE			5
R_3e1VBhzwy3uIgck	Government Researcher	M	TRUE	1	4-6	0	TRUE	FALSE			4	Perfectly	Very helpful	Fair	A Page
R_3e1VBhzwy3uIgck	Government Researcher	M	TRUE	52	1-3	0	TRUE	FALSE			3	Missed some minor points	Somewhat helpful	Fair	A Page
R_3e1VBhzwy3uIgck	Government Researcher	M	TRUE	30	7-9	0	TRUE	TRUE	TRUE	FALSE	4	Perfectly	Somewhat helpful	Fair	A Page
R_26b7xK6ftZnipR5	Associate Professor	M	TRUE	14	10-12	1	TRUE	TRUE	TRUE	TRUE	5
R_3iEBS9CeDcWR02n	Student	M	FALSE	17	4-6	0	FALSE	FALSE			3	Perfectly	Very helpful	Fair	A Page	0.5						0.666667
R_3iEBS9CeDcWR02n	Student	M	FALSE	17	4-6	0	FALSE	FALSE			3	Perfectly	Very helpful	Fair	Multiple Pages	0.5						0.333333
R_3iEBS9CeDcWR02n	Student	M	FALSE	17	4-6	0	FALSE	FALSE			3	Perfectly	Very helpful	Fair	A Page	0.5						0.666667
R_3iEBS9CeDcWR02n	Student	M	FALSE	16	4-6	1	FALSE	FALSE			4	Missed some minor points	Very helpful	Fair	A Page	0.5						0.333333
R_3iEBS9CeDcWR02n	Student	M	FALSE	16	4-6	1	FALSE	FALSE			4	Perfectly	Very helpful	Fair	A Page	0.25						0.666667
R_3iEBS9CeDcWR02n	Student	M	FALSE	16	4-6	1	FALSE	FALSE			4	Missed some minor points	Somewhat helpful	Somewhat fair	Half a Page	0.25						1
R_3iEBS9CeDcWR02n	Student	M	FALSE	16	4-6	1	FALSE	FALSE			4	Perfectly	Somewhat helpful	Fair	Half a Page	0.75						0.666667
R_3iEBS9CeDcWR02n	Student	M	FALSE	45	1-3	1	TRUE	FALSE			3	Missed some minor points	Somewhat helpful	Somewhat fair	Half a Page	0.5						1
R_3iEBS9CeDcWR02n	Student	M	FALSE	45	1-3	1	TRUE	FALSE			3	Missed some minor points	Somewhat helpful	Somewhat fair	Half a Page	0.75						0.666667
R_3iEBS9CeDcWR02n	Student	M	FALSE	45	1-3	1	TRUE	FALSE			3	Missed some minor points	Somewhat helpful	Somewhat fair	Half a Page	0.5						0.333333
R_25Ks0Y961irOW5G	Assistant Professor	M	FALSE	43	>12	0	TRUE	FALSE			6+
R_5jsqhLsB0VqIxlD	Student	M	FALSE	45	10-12	2	FALSE	TRUE	TRUE	TRUE	4
R_poqQlpP6c3Yvxmx	Student	M	FALSE	38
R_plSVupK7V5oL6h3	Student	M	FALSE	27	>12	1	TRUE	FALSE			5
R_324Ru9p06NTHWEm	Student	M	FALSE	12	10-12	1	TRUE	TRUE	TRUE	TRUE	5	Missed some minor points	Very helpful	Fair	A Page	0.666667	1	1	0.666667	0.666667	1	1
R_324Ru9p06NTHWEm	Student	M	FALSE	12	10-12	1	TRUE	TRUE	TRUE	TRUE	5	Missed some minor points	Somewhat helpful	Fair	A Page	0.666667	1	1	1	1	1	1
R_324Ru9p06NTHWEm	Student	M	FALSE	12	10-12	1	TRUE	TRUE	TRUE	TRUE	5	Missed some minor points	Somewhat helpful	Somewhat fair	Half a Page	1	1	1	1	1	1	1
R_324Ru9p06NTHWEm	Student	M	FALSE	12	10-12	1	TRUE	TRUE	TRUE	TRUE	5	Perfectly	Very helpful	Fair	Multiple Pages	0.666667	1	1	1	1	1	1
R_324Ru9p06NTHWEm	Student	M	FALSE	12	10-12	1	TRUE	TRUE	TRUE	TRUE	5	Perfectly	Very helpful	Fair	A Page	0.666667	1	1	1	1	1	1
R_2ziM4nQhdolvrUP	Professor	M	FALSE	10
R_2TtppHmZNNzG1MY	Professor	M	FALSE	26	7-9	0	FALSE	TRUE	TRUE	TRUE	6+
R_1pybq4CWJTIH9tQ	Student	F	FALSE	38	4-6	0	TRUE	FALSE			5
R_r6c7LrwSBt00p5D	Professor	M	TRUE	2	10-12	2	TRUE	TRUE	TRUE	FALSE	5
R_cUCz8HdIQDzNUfn	Assistant Professor	F	FALSE	12	>12	2	FALSE	FALSE			5	Missed some minor points	Very helpful	Fair	A Page	0.75
R_cUCz8HdIQDzNUfn	Assistant Professor	F	FALSE	12	>12	2	FALSE	FALSE			5	Missed some minor points	Very helpful	Fair	Multiple Pages	0.75
R_cUCz8HdIQDzNUfn	Assistant Professor	F	FALSE	12	>12	2	FALSE	FALSE			5	Missed some minor points	Very helpful	Fair	Multiple Pages	0.5
R_cUCz8HdIQDzNUfn	Assistant Professor	F	FALSE	12	>12	2	FALSE	FALSE			5	Missed some minor points	Very helpful		Multiple Pages	0.5
R_cUCz8HdIQDzNUfn	Assistant Professor	F	FALSE	12	>12	2	FALSE	FALSE			5	Perfectly	Very helpful	Fair	Multiple Pages	0.5
R_cUCz8HdIQDzNUfn	Assistant Professor	F	FALSE	12	>12	0	FALSE	FALSE			6+	Missed some minor points	Very helpful	Fair	A Page	1
R_cUCz8HdIQDzNUfn	Assistant Professor	F	FALSE	12	>12	0	FALSE	FALSE			6+	Missed some minor points	Very helpful	Fair	Half a Page	0.75
R_cUCz8HdIQDzNUfn	Assistant Professor	F	FALSE	12	>12	0	FALSE	FALSE			6+	Missed some minor points	Very helpful	Fair	Multiple Pages	0.75
R_cUCz8HdIQDzNUfn	Assistant Professor	F	FALSE	12	>12	0	FALSE	FALSE			6+	Missed some minor points	Very helpful	Fair	Multiple Pages	0.25
R_cUCz8HdIQDzNUfn	Assistant Professor	F	FALSE	12	>12	0	FALSE	FALSE			6+	Missed some minor points	Very helpful	Fair	A Page	0.25
R_cUCz8HdIQDzNUfn	Assistant Professor	F	FALSE	12	>12	0	FALSE	FALSE			6+	Missed some minor points	Very helpful	Fair	A Page	0.25
R_1kGqjNyi27Tr5l6	Assistant Professor	M	FALSE	2	10-12	0	FALSE	TRUE	TRUE	TRUE	3
R_6ilrYAY4bOQoWmB	Industry Researcher	M	FALSE	49	7-9	0	FALSE	FALSE			6+	Missed some minor points	Very helpful	Somewhat fair	Multiple Pages	0.5	0					0
R_6ilrYAY4bOQoWmB	Industry Researcher	M	FALSE	49	7-9	0	FALSE	FALSE			6+	Missed some minor points	Very helpful	Fair	Multiple Pages	0.5	0.25					0.5
R_6ilrYAY4bOQoWmB	Industry Researcher	M	FALSE	49	7-9	0	FALSE	FALSE			6+	Missed some minor points	Very helpful	Fair	Multiple Pages	1	0.75					0.5
R_6ilrYAY4bOQoWmB	Industry Researcher	M	FALSE	49	7-9	0	FALSE	FALSE			6+	Missed some minor points	Somewhat helpful	Fair	Half a Page	0.75	0.75					0.5
R_6ilrYAY4bOQoWmB	Industry Researcher	M	FALSE	49	7-9	0	FALSE	FALSE			6+	Missed some minor points	Very helpful	Fair	Multiple Pages	0.5	0.5					0.5
R_6ilrYAY4bOQoWmB	Industry Researcher	M	FALSE	49	7-9	0	FALSE	FALSE			6+	Missed some minor points	Very helpful	Fair	Multiple Pages	0.5	0.5					0.25
R_6ilrYAY4bOQoWmB	Industry Researcher	M	FALSE	12	7-9	0	FALSE	FALSE			6+	Perfectly	Very helpful	Fair	Multiple Pages	0.75						0.5
R_6ilrYAY4bOQoWmB	Industry Researcher	M	FALSE	12	7-9	0	FALSE	FALSE			6+	Misunderstood major points	Somewhat helpful	Unfair	A Page	0.25						0.75
R_6ilrYAY4bOQoWmB	Industry Researcher	M	FALSE	12	7-9	0	FALSE	FALSE			6+	Missed some minor points	Very helpful	Fair	Multiple Pages	0.5						0.5
R_6ilrYAY4bOQoWmB	Industry Researcher	M	FALSE	12	7-9	0	FALSE	FALSE			6+	Missed some minor points	Very helpful	Fair	Multiple Pages	0.5						0.25
R_6ilrYAY4bOQoWmB	Industry Researcher	M	FALSE	12	7-9	0	FALSE	FALSE			6+	Missed some minor points	Somewhat helpful	Somewhat fair	A Page	0.5						0.25
R_6ilrYAY4bOQoWmB	Industry Researcher	M	FALSE	12	7-9	0	FALSE	FALSE			6+	Missed some minor points	Somewhat helpful	Fair	A Page	0.25						0
R_0p3zhVXKJ2vdnHj	Student	M	FALSE	12	10-12	0	FALSE	TRUE	TRUE	TRUE	6+	Perfectly	Very helpful	Fair	Half a Page	1						1
R_0p3zhVXKJ2vdnHj	Student	M	FALSE	12	10-12	0	FALSE	TRUE	TRUE	TRUE	6+	Perfectly	Very helpful	Fair	A Page	0.5						0.666667
R_0p3zhVXKJ2vdnHj	Student	M	FALSE	12	10-12	0	FALSE	TRUE	TRUE	TRUE	6+	Missed some minor points	Somewhat helpful	Somewhat fair	Half a Page	0.5						1
R_0p3zhVXKJ2vdnHj	Student	M	FALSE	12	10-12	0	FALSE	TRUE	TRUE	TRUE	6+	Missed some minor points	Not at all	Somewhat fair	Half a Page	0.5						0.333333
R_0p3zhVXKJ2vdnHj	Student	M	FALSE	12	10-12	0	FALSE	TRUE	TRUE	TRUE	6+	Missed some minor points	Somewhat helpful	Somewhat fair	1-2 Paragraphs	0.5						1
R_0p3zhVXKJ2vdnHj	Student	M	FALSE	12	10-12	0	FALSE	TRUE	TRUE	TRUE	6+	Missed some minor points	Not at all	Unfair	1-2 Paragraphs	0.5						0
R_6MwkyRB9bUezv3z	Student	M	FALSE	47	>12	2	FALSE	FALSE			4	Misunderstood major points	Somewhat helpful	Somewhat fair	A Page
R_WCpQ73Vtmv73ESR	Professor	M	TRUE	31	>12	1	TRUE	TRUE	TRUE	TRUE	5	Misunderstood major points	Not at all	Fair	1-2 Paragraphs	0.5						0.333333
R_WCpQ73Vtmv73ESR	Professor	M	TRUE	31	>12	1	TRUE	TRUE	TRUE	TRUE	5	Missed some minor points	Somewhat helpful	Fair	A Page	0.75						1
R_WCpQ73Vtmv73ESR	Professor	M	TRUE	31	>12	1	TRUE	TRUE	TRUE	TRUE	5	Missed some minor points	Somewhat helpful	Fair	A Page	0.5						0.333333
R_WCpQ73Vtmv73ESR	Professor	M	TRUE	31	>12	1	TRUE	TRUE	TRUE	TRUE	5	Missed some minor points	Somewhat helpful	Fair	A Page	0.5						1
R_WCpQ73Vtmv73ESR	Professor	M	TRUE	31	>12	1	TRUE	TRUE	TRUE	TRUE	5	Missed some minor points	Somewhat helpful	Fair	A Page	0.75						0.666667
R_2B2LqawHSuSgSQq	Government Researcher	M	TRUE	39	10-12	0	TRUE	TRUE	TRUE	TRUE	4	Missed some minor points	Somewhat helpful	Fair	1-2 Paragraphs
R_SJHDErpWJqPOhz3	Student	F	TRUE	51	4-6	0	TRUE	TRUE	TRUE	TRUE	3	Missed some minor points	Somewhat helpful	Fair	A Page	0.666667	1	0.666667	0.666667	1	1	1
R_SJHDErpWJqPOhz3	Student	F	TRUE	51	4-6	0	TRUE	TRUE	TRUE	TRUE	3	Perfectly	Somewhat helpful	Fair	Half a Page	1	1	1	0.666667	0.666667	1	1
R_SJHDErpWJqPOhz3	Student	F	TRUE	51	4-6	0	TRUE	TRUE	TRUE	TRUE	3	Perfectly	Somewhat helpful	Fair	Half a Page	1	1	0.666667	0.666667	1	1	1
R_reYxnvVWa9YjjiN	Student	F	FALSE	46	>12	1	TRUE	TRUE	TRUE	TRUE	4
R_2q4dE1XeyqQN69q				51
R_56eYFNVFB7xdLxv	Assistant Professor	M	FALSE	39	4-6	0	FALSE	FALSE			4
R_245AEgpjHCfHIqa	Student	M	TRUE	34	7-9	3	TRUE	TRUE	TRUE	TRUE	4
R_bydjxtuRgQgBt0l	Professor	M	TRUE	21	>12	0	TRUE	TRUE	TRUE	TRUE	5	Missed some minor points	Somewhat helpful	Fair	A Page
R_bydjxtuRgQgBt0l	Professor	M	TRUE	34	7-9	3	TRUE	TRUE	TRUE	FALSE	4	Perfectly	Somewhat helpful		A Page
R_bydjxtuRgQgBt0l	Professor	M	TRUE	53	7-9	0	TRUE	TRUE	TRUE	TRUE	3	Perfectly	Very helpful	Fair	A Page
R_3I9pxk5GaRPTbWP	Student	M	FALSE	40	10-12	2	FALSE	FALSE			3	Missed some minor points	Not at all	Unfair	Half a Page	0.5	0.5	0.75		0.5	1	0.5
R_3I9pxk5GaRPTbWP	Student	M	FALSE	40	10-12	2	FALSE	FALSE			3	Missed some minor points	Not at all	Fair	Half a Page	0.75	1	1		0.75	1	1
R_3I9pxk5GaRPTbWP	Student	M	FALSE	40	10-12	2	FALSE	FALSE			3	Missed some minor points	Not at all	Fair	Half a Page	0.75	1	1		0.75	1	0.5
R_3O9arAhK2Md6FNF	Assistant Professor	M	FALSE	31	10-12	1	FALSE	FALSE			5	Perfectly	Very helpful	Fair	Half a Page
R_2OGvfu2p70zw3M2	Student	M	TRUE	7	4-6	1	TRUE	TRUE	TRUE	FALSE	4
R_1ews5UaCwDGGqz6	Student	F	FALSE	30	7-9	1	TRUE	TRUE	TRUE	TRUE	4
R_3CV7qJZrgVVBfi1	Assistant Professor	M	TRUE	26	7-9	1	TRUE	TRUE	TRUE	FALSE	6+	Perfectly	Very helpful	Fair	A Page	0.75	0.666667	1	1	1		0.666667
R_3CV7qJZrgVVBfi1	Assistant Professor	M	TRUE	26	7-9	1	TRUE	TRUE	TRUE	FALSE	6+	Perfectly	Very helpful	Fair	A Page	0.5	0.333333	0.333333	0.666667	0.666667		0.333333
R_3CV7qJZrgVVBfi1	Assistant Professor	M	TRUE	26	7-9	1	TRUE	TRUE	TRUE	FALSE	6+	Perfectly	Very helpful	Fair	A Page	0.5	0.333333	0.333333	0.666667	0.666667		0.666667
R_3CV7qJZrgVVBfi1	Assistant Professor	M	TRUE	26	7-9	1	TRUE	TRUE	TRUE	FALSE	6+	Perfectly	Very helpful	Fair	Multiple Pages	0.25	0	0.333333	0.666667	0.333333		0.666667
R_3CV7qJZrgVVBfi1	Assistant Professor	M	TRUE	26	7-9	1	TRUE	TRUE	TRUE	FALSE	6+	Perfectly	Not at all	Unfair	Half a Page	0.5	1	0.666667	0.666667	0.666667		0.666667
R_3CV7qJZrgVVBfi1	Assistant Professor	M	TRUE	26	7-9	1	TRUE	TRUE	TRUE	FALSE	6+	Perfectly	Very helpful	Fair	Multiple Pages	0.5	0.333333	0.333333	0.666667	1		0.666667
R_2vekJg3Iv7SGFiC	Student	F	FALSE	18	10-12	2	FALSE	TRUE	TRUE	TRUE	3	Perfectly	Very helpful	Fair	Multiple Pages
R_0cCtgqMBPA7kRNv	Associate Professor	M	FALSE	13	10-12	0	FALSE	FALSE			3	Missed some minor points	Somewhat helpful	Fair	Half a Page
R_3MgjstsPmfFcH0X	Associate Professor	M	TRUE	46	>12	0	TRUE	FALSE			3
R_3sv8aBTcrWY4JEL	Industry Researcher	M	FALSE	40
R_3EKsOqARXA4YVdT	Industry Researcher	M	FALSE	39	>12	2	TRUE	FALSE			4	Missed some minor points	Somewhat helpful	Fair	1-2 Paragraphs
R_9NZWGu7tGqF2eZz	Student	F	FALSE	40	4-6	0	FALSE	FALSE			3	Missed some minor points	Somewhat helpful	Somewhat fair	A Page	0.777778	0.777778	0.777778	0.777778	0.777778	1	0.666667
R_9NZWGu7tGqF2eZz	Student	F	FALSE	40	4-6	0	FALSE	FALSE			3	Perfectly	Very helpful	Fair	A Page	0.777778	0.888889	0.777778	0.888889	0.777778	1	1
R_9NZWGu7tGqF2eZz	Student	F	FALSE	40	4-6	0	FALSE	FALSE			3	Missed some minor points	Somewhat helpful	Somewhat fair	A Page	0.777778	0.777778	0.777778	0.666667	0.777778	1	1
R_1MLDb6MDmtoShGz	Student	M	FALSE	31	1-3	0	TRUE	TRUE	TRUE	TRUE	5	Missed some minor points	Somewhat helpful	Fair	Half a Page	0.5						1
R_1MLDb6MDmtoShGz	Student	M	FALSE	31	1-3	0	TRUE	TRUE	TRUE	TRUE	5	Perfectly	Somewhat helpful	Fair	1-2 Paragraphs	0.75						0.666667
R_1MLDb6MDmtoShGz	Student	M	FALSE	31	1-3	0	TRUE	TRUE	TRUE	TRUE	5	Missed some minor points	Somewhat helpful	Fair	Half a Page	0.5						1
R_1MLDb6MDmtoShGz	Student	M	FALSE	31	1-3	0	TRUE	TRUE	TRUE	TRUE	5	Perfectly	Somewhat helpful	Fair	1-2 Paragraphs	0.5						1
R_1MLDb6MDmtoShGz	Student	M	FALSE	31	1-3	0	TRUE	TRUE	TRUE	TRUE	5	Missed some minor points	Very helpful	Somewhat fair	A Page
R_sgKqk24DwaT2HcJ	Associate Professor	M	FALSE	16	10-12	1	FALSE	FALSE			4	Perfectly	Very helpful	Fair	A Page	0.5						0.666667
R_sgKqk24DwaT2HcJ	Associate Professor	M	FALSE	16	10-12	1	FALSE	FALSE			4	Missed some minor points	Somewhat helpful	Somewhat fair	1-2 Paragraphs	0.25						0.333333
R_sgKqk24DwaT2HcJ	Associate Professor	M	FALSE	16	10-12	1	FALSE	FALSE			4	Missed some minor points	Very helpful	Fair	A Page	0.75						0.333333
R_sgKqk24DwaT2HcJ	Associate Professor	M	FALSE	16	10-12	1	FALSE	FALSE			4	Perfectly	Very helpful	Fair	A Page	0.5						0.666667
R_8B1iuDQ96JYSp2h	Student	M	TRUE	34	4-6	0	TRUE	FALSE			3
R_2zzFK0LVKjtcKpL				52
R_2B2tQqz8Kbftp8C	Other	M	FALSE	46
R_3pswh6FFxaQiks8	Postdoctoral Researcher	M	FALSE	37	4-6	0	FALSE	FALSE			4	Perfectly	Very helpful		Multiple Pages
R_9B1WSAAQwyhZHMJ	Associate Professor	M	TRUE	42	>12	0	TRUE	FALSE			4	Missed some minor points	Somewhat helpful	Fair	A Page
R_30jKr2IjdQolFYZ	Assistant Professor	M	FALSE	21	4-6	1	TRUE	TRUE	TRUE	TRUE	4
R_1eJEdUO7JM8WNRk	Student	M	TRUE	48	4-6	0	TRUE	FALSE			3
R_1g2d1VShNKCn2Ft	Assistant Professor	M	TRUE	39	4-6	1	TRUE	TRUE	TRUE	FALSE	4	Missed some minor points	Somewhat helpful	Fair	Half a Page
R_1g2d1VShNKCn2Ft	Assistant Professor	M	TRUE	46	4-6	3	TRUE	FALSE			3	Missed some minor points	Somewhat helpful	Fair	Half a Page
R_1g2d1VShNKCn2Ft	Assistant Professor	M	TRUE	19	4-6	0	TRUE	FALSE			4	Missed some minor points	Very helpful	Fair	A Page
R_3h4qsPoZbk71I5N	Student	M	FALSE	18	>12	0	FALSE	TRUE	TRUE	TRUE	3	Perfectly	Very helpful	Fair	Multiple Pages
R_1mLgTBOnusBtJ26	Student	M	FALSE	22	>12	0	FALSE	TRUE	TRUE	TRUE	4	Perfectly	Very helpful	Fair	Half a Page	0.5	0.5	0.75	0.5	1	1	0.75
R_1mLgTBOnusBtJ26	Student	M	FALSE	22	>12	0	FALSE	TRUE	TRUE	TRUE	4	Missed some minor points	Very helpful	Fair	Half a Page	0.75	0.75	0.75	0.5	1	1	0.5
R_1mLgTBOnusBtJ26	Student	M	FALSE	22	>12	0	FALSE	TRUE	TRUE	TRUE	4	Perfectly	Somewhat helpful	Fair	1-2 Paragraphs	0.75	0.75	0.75	0.5	1	1	0.5
R_1mLgTBOnusBtJ26	Student	M	FALSE	22	>12	0	FALSE	TRUE	TRUE	TRUE	4	Perfectly	Very helpful	Fair	Half a Page	0.75	0.75	0.75	0.75	1	1	1
R_phN537XLUGt2i5	Student	M	FALSE	2
R_2xwRf0e0ekfjozd	Professor	M	FALSE	1	7-9	3	TRUE	FALSE			3
R_3husEHVNd3p4Qiq	Student	M	FALSE	50	4-6	2	FALSE	TRUE	TRUE	TRUE	5	Missed some minor points	Somewhat helpful	Fair	Half a Page
R_W6Au91tbm3n2ctH	Student	M	FALSE	49	7-9	0	TRUE	FALSE			6+
R_2sXwsnSuvQBKE4j	Assistant Professor	M	FALSE	26	4-6	0	FALSE	TRUE	TRUE	TRUE	5	Missed some minor points	Somewhat helpful	Fair	A Page
R_2aRb2g8wQVy7eal	Student	M	FALSE	45	4-6	0	FALSE	FALSE			3	Probably didn't read it	Somewhat helpful	Somewhat fair	Half a Page
R_x5UV7tlMDk1VLgZ	Industry Researcher	M	TRUE	48	4-6	0	TRUE	FALSE			4	Perfectly	Very helpful	Fair	Half a Page
R_1pLOl8zc9dA4mzV	Industry Researcher	M	FALSE	40	4-6	0	FALSE	FALSE			3	Missed some minor points	Somewhat helpful	Somewhat fair	Multiple Pages	0.5	0.75	0.5		0.75	1	0.5
R_1pLOl8zc9dA4mzV	Industry Researcher	M	FALSE	40	4-6	0	FALSE	FALSE			3	Missed some minor points	Somewhat helpful	Fair	A Page
R_1pLOl8zc9dA4mzV	Industry Researcher	M	FALSE	40	4-6	0	FALSE	FALSE			3	Perfectly	Not at all	Fair	A Page	1	1	1		1	1	1
R_21aK2rfHKoPvJ94	Student	F	TRUE	40	7-9	1	TRUE	FALSE			3	Missed some minor points	Very helpful	Fair	A Page	0.75	0.75	1		0.75	1	1
R_21aK2rfHKoPvJ94	Student	F	TRUE	40	7-9	1	TRUE	FALSE			3	Perfectly	Not at all	Fair	A Page	0.75	0.75	0.75		0.5	1	0.5
R_21aK2rfHKoPvJ94	Student	F	TRUE	40	7-9	1	TRUE	FALSE			3	Perfectly	Very helpful	Fair	A Page	0.75	0.75	0.75		0.5	1	1
R_32R7piOjEBXtfH2	Student	M	FALSE	18	7-9	1	FALSE	TRUE	TRUE	TRUE	3	Missed some minor points	Very helpful	Fair	A Page	0.75	0.5	0.5	0.5	0.5	1	0.5
R_32R7piOjEBXtfH2	Student	M	FALSE	18	7-9	1	FALSE	TRUE	TRUE	TRUE	3	Missed some minor points	Somewhat helpful	Somewhat fair	A Page	0.75	0.25	0.25	0.5	0.5	1	0.5
R_32R7piOjEBXtfH2	Student	M	FALSE	18	7-9	1	FALSE	TRUE	TRUE	TRUE	3	Perfectly	Very helpful	Fair	Multiple Pages	0.75	0.25	0.25	0.25	0.75	1	0.5
R_2D1TyfO9ARyOHaP	Associate Professor	M	TRUE	14	10-12	1	TRUE	TRUE	TRUE	TRUE	5
R_1rIC1ubedPT2IIH	Student	M	FALSE	7	1-3	0	FALSE	FALSE			4	Perfectly	Not at all	Fair	A Page	0.5						1
R_1rIC1ubedPT2IIH	Student	M	FALSE	7	1-3	0	FALSE	FALSE			4	Perfectly	Somewhat helpful	Fair	Multiple Pages	0.75						0.666667
R_1rIC1ubedPT2IIH	Student	M	FALSE	7	1-3	0	FALSE	FALSE			4	Perfectly	Somewhat helpful	Fair	A Page	0.25						0.666667
R_1rIC1ubedPT2IIH	Student	M	FALSE	7	1-3	0	FALSE	FALSE			4	Missed some minor points	Not at all	Somewhat fair	Half a Page	0.5						0.333333
R_vpkmgEFcFO6rY3L	Professor	M	TRUE	14	10-12	0	TRUE	TRUE	TRUE	TRUE	5	Missed some minor points	Somewhat helpful	Somewhat fair	Half a Page	0.75		0.5		0.25		0.75
R_vpkmgEFcFO6rY3L	Professor	M	TRUE	14	10-12	0	TRUE	TRUE	TRUE	TRUE	5	Perfectly	Somewhat helpful	Fair	A Page	0.75		0.5		0.5		0.75
R_vpkmgEFcFO6rY3L	Professor	M	TRUE	14	10-12	0	TRUE	TRUE	TRUE	TRUE	5	Missed some minor points	Very helpful	Fair	Multiple Pages	0.5		0.5		0.25		0.75
R_vpkmgEFcFO6rY3L	Professor	M	TRUE	14	10-12	0	TRUE	TRUE	TRUE	TRUE	5	Missed some minor points	Not at all	Somewhat fair	1-2 Paragraphs	1		0.75		0.75		0.5
R_vpkmgEFcFO6rY3L	Professor	M	TRUE	14	10-12	0	TRUE	TRUE	TRUE	TRUE	5				Half a Page	0.75		0.75		0.5		1
R_1LuNNfa5ksipgd5	Professor	M	TRUE	37	>12	1	TRUE	TRUE	TRUE	TRUE	5	Missed some minor points	Somewhat helpful	Fair	Multiple Pages	1						0.333333
R_1LuNNfa5ksipgd5	Professor	M	TRUE	37	>12	1	TRUE	TRUE	TRUE	TRUE	5	Missed some minor points	Somewhat helpful	Somewhat fair	Half a Page	0.25						0.333333
R_1LuNNfa5ksipgd5	Professor	M	TRUE	37	>12	1	TRUE	TRUE	TRUE	TRUE	5	Missed some minor points	Somewhat helpful	Somewhat fair	Half a Page	0.5						0.333333
R_1LuNNfa5ksipgd5	Professor	M	TRUE	37	>12	1	TRUE	TRUE	TRUE	TRUE	5	Missed some minor points	Somewhat helpful	Fair	A Page	1						0.666667
R_1LuNNfa5ksipgd5	Professor	M	TRUE	37	>12	1	TRUE	TRUE	TRUE	TRUE	5	Missed some minor points	Somewhat helpful	Fair	A Page	0.75						0
R_TduyPuMELEvzXIR	Assistant Professor	M	FALSE	2
R_Wd3rxDTfn1kJH7b	Student	M	FALSE	53
R_3M4e71xo0eSiYD7	Government Researcher	F	TRUE	33	7-9	0	TRUE	FALSE			4	Perfectly	Very helpful	Fair	A Page
R_3M4e71xo0eSiYD7	Government Researcher	F	TRUE	37	>12	2	TRUE	FALSE			4	Perfectly	Somewhat helpful	Fair	A Page
R_2Yz9wYxDY2z2nx9				49
R_1jJ8WPirY5gc0ZP	Other	M	TRUE	26	4-6	1	TRUE	TRUE	TRUE	TRUE	6+	Perfectly	Somewhat helpful	Fair	Multiple Pages
R_3qP9Xo4mRxMRpif	Industry Researcher	F	TRUE	19	7-9	3	TRUE	TRUE	TRUE	TRUE	4	Missed some minor points	Somewhat helpful	Fair	Multiple Pages	0.75	0.5	1	0.5	0.75	0.75	0.75
R_3qP9Xo4mRxMRpif	Industry Researcher	F	TRUE	19	7-9	3	TRUE	TRUE	TRUE	TRUE	4	Missed some minor points	Not at all	Somewhat fair	1-2 Paragraphs	0.75	0.75	0.75	0.75	0.75	0.75	0.5
R_3qP9Xo4mRxMRpif	Industry Researcher	F	TRUE	19	7-9	3	TRUE	TRUE	TRUE	TRUE	4	Perfectly	Not at all	Fair	Half a Page	1	0.75	0.75	0.75	0.75	0.75	0.75
R_3qP9Xo4mRxMRpif	Industry Researcher	F	TRUE	19	7-9	3	TRUE	TRUE	TRUE	TRUE	4	Perfectly	Very helpful	Fair	A Page	0.75	0.75	0.75	0.5	0.75	0.75	1
R_5itj15LRkV3HQyt	Student	M	FALSE	49	7-9	0	TRUE	TRUE	TRUE	TRUE	4
R_1rvugTXqimHKz5P	Student	F	TRUE	7	4-6	0	TRUE	FALSE			3	Missed some minor points	Somewhat helpful	Fair	Half a Page	0.5						0.666667
R_1rvugTXqimHKz5P	Student	F	TRUE	7	4-6	0	TRUE	FALSE			3	Perfectly	Somewhat helpful	Fair	Half a Page	0.75						0.666667
R_1rvugTXqimHKz5P	Student	F	TRUE	7	4-6	0	TRUE	FALSE			3	Perfectly	Not at all	Somewhat fair	1-2 Paragraphs	0.25						0.333333
R_zclruzzvgoL48wN	Professor	M	FALSE	30	4-6	0	FALSE	TRUE	TRUE	TRUE	5	Missed some minor points	Very helpful	Fair	A Page
R_3qI4OePuQybm8e3	Professor	M	FALSE	53	>12	0	FALSE	TRUE	TRUE	TRUE	4
R_ueorz69eVBXYIKt	Associate Professor	M	TRUE	19	10-12	0	TRUE	FALSE			4	Missed some minor points	Very helpful	Somewhat fair	Half a Page
R_yshQVDsUwJrcjXr	Associate Professor	M	FALSE	53	>12	1	TRUE	TRUE	TRUE	TRUE	3	Missed some minor points	Very helpful	Fair	A Page	0.666667						0.666667
R_yshQVDsUwJrcjXr	Associate Professor	M	FALSE	53	>12	1	TRUE	TRUE	TRUE	TRUE	3	Missed some minor points	Somewhat helpful	Fair	Half a Page							0.666667
R_yshQVDsUwJrcjXr	Associate Professor	M	FALSE	53	>12	1	TRUE	TRUE	TRUE	TRUE	3	Missed some minor points	Very helpful	Fair	A Page							0.666667
R_1IQ5mEB727rM6PP	Student	M	FALSE	53	7-9	0	FALSE	TRUE	TRUE	TRUE	3	Missed some minor points	Very helpful	Fair	A Page	1						0.333333
R_1IQ5mEB727rM6PP	Student	M	FALSE	53	7-9	0	FALSE	TRUE	TRUE	TRUE	3	Misunderstood major points	Somewhat helpful	Somewhat fair	A Page	0.666667						0.666667
R_1IQ5mEB727rM6PP	Student	M	FALSE	53	7-9	0	FALSE	TRUE	TRUE	TRUE	3	Missed some minor points	Not at all	Somewhat fair	1-2 Paragraphs	1						0.333333
R_1IQ5mEB727rM6PP	Student	M	FALSE	53	10-12	0	FALSE	TRUE	TRUE	TRUE	4	Missed some minor points	Somewhat helpful	Somewhat fair	Half a Page	0.666667						0.333333
R_1IQ5mEB727rM6PP	Student	M	FALSE	53	10-12	0	FALSE	TRUE	TRUE	TRUE	4	Misunderstood major points	Not at all	Unfair	Half a Page	0.666667						0.666667
R_1IQ5mEB727rM6PP	Student	M	FALSE	53	10-12	0	FALSE	TRUE	TRUE	TRUE	4	Missed some minor points	Not at all	Somewhat fair	A Page	0.666667						0
R_1IQ5mEB727rM6PP	Student	M	FALSE	53	10-12	0	FALSE	TRUE	TRUE	TRUE	4	Perfectly	Somewhat helpful	Somewhat fair	Multiple Pages	0.666667						0.333333
R_2zdOzdUAd5DsRZ1	Assistant Professor	M	TRUE	34	7-9	1	TRUE	TRUE	TRUE	TRUE	5	Missed some minor points	Not at all	Somewhat fair	1-2 Paragraphs	0.5		0.5	0.25	0.5		0.5
R_2zdOzdUAd5DsRZ1	Assistant Professor	M	TRUE	34	7-9	1	TRUE	TRUE	TRUE	TRUE	5	Missed some minor points	Somewhat helpful	Fair	1-2 Paragraphs	0.5		0.75	0.5	0.5		0.75
R_2zdOzdUAd5DsRZ1	Assistant Professor	M	TRUE	34	7-9	1	TRUE	TRUE	TRUE	TRUE	5	Misunderstood major points	Not at all	Unfair	Half a Page	0.25		0.75	0.25	0.25		0.75
R_2zdOzdUAd5DsRZ1	Assistant Professor	M	TRUE	34	7-9	1	TRUE	TRUE	TRUE	TRUE	5	Perfectly	Somewhat helpful	Fair	A Page	0.5		0.5	0.25	0.5		0.75
R_2zdOzdUAd5DsRZ1	Assistant Professor	M	TRUE	34	7-9	1	TRUE	TRUE	TRUE	TRUE	5	Perfectly	Very helpful	Fair	1-2 Paragraphs	0.5		0.5	0.5	0.75		0.5
R_PM4M5zYPEzoN15f	Professor	M	FALSE	5	4-6	0	FALSE	FALSE			4	Missed some minor points	Somewhat helpful	Fair	A Page	0.5
R_PM4M5zYPEzoN15f	Professor	M	FALSE	5	4-6	0	FALSE	FALSE			4	Missed some minor points	Somewhat helpful	Fair	A Page	0.5
R_PM4M5zYPEzoN15f	Professor	M	FALSE	5	4-6	0	FALSE	FALSE			4	Missed some minor points	Not at all	Somewhat fair	Half a Page	1
R_PM4M5zYPEzoN15f	Professor	M	FALSE	5	4-6	0	FALSE	FALSE			4	Misunderstood major points	Not at all	Somewhat fair	1-2 Paragraphs	0
R_25ZQx8rfECYZbQS	Industry Researcher	M	FALSE	9	10-12	2	TRUE	TRUE	TRUE	FALSE	4
R_T1qpHSAI3W3LXhv	Industry Researcher	M	FALSE	31	7-9	0	FALSE	TRUE	TRUE	TRUE	5
R_UFHDRtV6LO05O9j	Assistant Professor	M	TRUE	54	7-9	0	TRUE	FALSE			5	Perfectly	Somewhat helpful	Fair	A Page	1						0.666667
R_UFHDRtV6LO05O9j	Assistant Professor	M	TRUE	54	7-9	0	TRUE	FALSE			5	Perfectly	Very helpful	Fair	A Page	1						0.666667
R_UFHDRtV6LO05O9j	Assistant Professor	M	TRUE	54	7-9	0	TRUE	FALSE			5	Missed some minor points	Somewhat helpful	Fair	A Page	0.75						1
R_UFHDRtV6LO05O9j	Assistant Professor	M	TRUE	54	7-9	0	TRUE	FALSE			5	Missed some minor points	Somewhat helpful	Fair	Half a Page	0.75						0.333333
R_UFHDRtV6LO05O9j	Assistant Professor	M	TRUE	54	7-9	0	TRUE	FALSE			5	Perfectly	Somewhat helpful	Fair	A Page	0.75						0.666667
R_3IY7YjkfCK2XkxL	Professor	M	FALSE	39	10-12	0	FALSE	FALSE			5
R_ex4PajUl6VsUhy1	Student	M	FALSE	30	10-12	0	FALSE	TRUE	TRUE	TRUE	5	Missed some minor points	Somewhat helpful	Somewhat fair	A Page
R_Buno6ux6LiY4so1	Other	M	FALSE	23
R_32WlfALSx2wXoix	Associate Professor	M	FALSE	12	7-9	0	FALSE	FALSE			6+	Perfectly	Somewhat helpful	Fair	Multiple Pages
R_10U30KBmAATErrS	Assistant Professor	M	FALSE	53	>12	0	FALSE	TRUE	TRUE	TRUE	4	Missed some minor points	Very helpful	Fair	Multiple Pages
R_4VhIWhA9oiTR2SZ	Government Researcher	M	FALSE	7	4-6	0	TRUE	FALSE			3					1						1
R_4VhIWhA9oiTR2SZ	Government Researcher	M	FALSE	7	4-6	0	TRUE	FALSE			3					0.75						0.666667
R_4VhIWhA9oiTR2SZ	Government Researcher	M	FALSE	7	4-6	0	TRUE	FALSE			3					0.5						1
R_dh7AqB4n4e0DTFf	Student	M	FALSE	7	>12	0	FALSE	FALSE			3	Perfectly	Very helpful	Fair	A Page	0.5						1
R_dh7AqB4n4e0DTFf	Student	M	FALSE	7	>12	0	FALSE	FALSE			3	Misunderstood major points	Not at all	Somewhat fair	A Page	0.25						0
R_dh7AqB4n4e0DTFf	Student	M	FALSE	7	>12	0	FALSE	FALSE			3	Missed some minor points	Somewhat helpful	Somewhat fair	Half a Page	0.5						0.333333
R_dh7AqB4n4e0DTFf	Student	M	FALSE	21	10-12	0	TRUE	FALSE			0
R_87it790OTwm4uc1	Other	M	TRUE	2	4-6	0	TRUE	TRUE	TRUE	TRUE	4
R_12KYJpgCnRQ3EkR	Government Researcher	M	FALSE	21	7-9	0	FALSE	FALSE			4	Missed some minor points	Somewhat helpful	Fair	Half a Page	0.5	1		0.25	0.25	1	0.5
R_12KYJpgCnRQ3EkR	Government Researcher	M	FALSE	21	7-9	0	FALSE	FALSE			4	Perfectly	Very helpful	Fair	A Page	0.75	0.75	0.5	0.5	0.5		0.25
R_12KYJpgCnRQ3EkR	Government Researcher	M	FALSE	21	7-9	0	FALSE	FALSE			4	Missed some minor points	Somewhat helpful	Fair	Half a Page	1	1	0.75	1			0.5
R_12KYJpgCnRQ3EkR	Government Researcher	M	FALSE	21	7-9	0	FALSE	FALSE			4	Missed some minor points	Somewhat helpful	Fair	Half a Page	1	0.75	1	0.75	0.5		0.25
R_2QoNkGHwwwTbsWe	Student	M	FALSE	10
R_1MWZVcbyHqNjl0J	Professor	M	FALSE	10	4-6	0	FALSE	TRUE	TRUE	TRUE	5
R_QfEut33CesSmxd7	Other	M	FALSE	42	4-6	0	FALSE	TRUE	TRUE	FALSE	3	Missed some minor points	Somewhat helpful	Fair	1-2 Paragraphs	0.666667	1	0.666667	0.666667	0.666667	1	1
R_1FvwRvYQjBFGbQZ	Assistant Professor	M	FALSE	10	>12	3	FALSE	FALSE			5
R_3IagC6j4APdxgbe	Assistant Professor	M	FALSE	53	7-9	0	FALSE	TRUE	TRUE	TRUE	4	Missed some minor points	Somewhat helpful	Fair	A Page	0.75						0.333333
R_3IagC6j4APdxgbe	Assistant Professor	M	FALSE	53	7-9	0	FALSE	TRUE	TRUE	TRUE	4	Perfectly	Very helpful	Fair	Half a Page	0.5						0.666667
R_3IagC6j4APdxgbe	Assistant Professor	M	FALSE	53	7-9	0	FALSE	TRUE	TRUE	TRUE	4	Missed some minor points	Somewhat helpful	Fair	Half a Page	0.75						0.333333
R_3IagC6j4APdxgbe	Assistant Professor	M	FALSE	53	7-9	0	FALSE	TRUE	TRUE	TRUE	4	Missed some minor points	Somewhat helpful	Fair	Half a Page	0.75						0.666667
R_3IagC6j4APdxgbe	Assistant Professor	M	FALSE	53	10-12	0	FALSE	TRUE	TRUE	TRUE	4	Missed some minor points	Somewhat helpful	Fair	Half a Page	0.5						0.333333
R_3IagC6j4APdxgbe	Assistant Professor	M	FALSE	53	10-12	0	FALSE	TRUE	TRUE	TRUE	4	Perfectly	Very helpful	Fair	Half a Page	0.5						0.666667
R_3IagC6j4APdxgbe	Assistant Professor	M	FALSE	53	10-12	0	FALSE	TRUE	TRUE	TRUE	4	Missed some minor points	Somewhat helpful	Fair	A Page	0.5						0
R_3IagC6j4APdxgbe	Assistant Professor	M	FALSE	53	10-12	0	FALSE	TRUE	TRUE	TRUE	4	Missed some minor points	Somewhat helpful	Fair	Multiple Pages	0.5						0.333333
R_1OK7BsdO8uuDQE0	Professor	M	TRUE	2	>12	2	TRUE	TRUE	TRUE	TRUE	4
R_AmQEyVXKAzk8x9f	Student	M	FALSE	27	1-3	1	FALSE	FALSE			5	Missed some minor points	Very helpful	Fair	A Page	0.5
R_AmQEyVXKAzk8x9f	Student	M	FALSE	27	1-3	1	FALSE	FALSE			5	Missed some minor points	Very helpful	Somewhat fair	A Page	0.25
R_AmQEyVXKAzk8x9f	Student	M	FALSE	27	1-3	1	FALSE	FALSE			5	Perfectly	Very helpful	Fair	A Page	0.5
R_AmQEyVXKAzk8x9f	Student	M	FALSE	27	1-3	1	FALSE	FALSE			5	Perfectly	Somewhat helpful	Somewhat fair	Half a Page	0.25
R_AmQEyVXKAzk8x9f	Student	M	FALSE	27	1-3	1	FALSE	FALSE			5	Missed some minor points	Somewhat helpful	Fair	A Page	0.75
R_WlEfev2R0O2oWMV	Professor	M	FALSE	56
R_3kIhJkIfy039e72	Associate Professor	M	FALSE	55	10-12	2	FALSE	TRUE	TRUE	TRUE	3
R_6XPJQCs9REz9xlv	Student	M	FALSE	40	4-6	0	FALSE	FALSE			3	Missed some minor points	Somewhat helpful	Fair	Half a Page	0.75	0.75	0.75	1	0.75	1	0.5
R_6XPJQCs9REz9xlv	Student	M	FALSE	40	4-6	0	FALSE	FALSE			3	Missed some minor points	Very helpful	Fair	A Page	1	0.75	0.75	1	0.75	1	0
R_6XPJQCs9REz9xlv	Student	M	FALSE	40	4-6	0	FALSE	FALSE			3	Missed some minor points	Very helpful	Fair	A Page	0.75	0.75	0.75	1	0.75	1	0
R_3Hkrf4GdtUGROw7	Assistant Professor	F	FALSE	43	>12	4	TRUE	FALSE			5	Perfectly	Very helpful	Fair	A Page	0.75						0.333333
R_3Hkrf4GdtUGROw7	Assistant Professor	F	FALSE	43	>12	4	TRUE	FALSE			5	Missed some minor points	Somewhat helpful	Fair	Half a Page	0.5						0.333333
R_3Hkrf4GdtUGROw7	Assistant Professor	F	FALSE	43	>12	4	TRUE	FALSE			5	Missed some minor points	Not at all	Fair	Half a Page	0.5						0
R_3Hkrf4GdtUGROw7	Assistant Professor	F	FALSE	43	>12	4	TRUE	FALSE			5	Missed some minor points	Somewhat helpful	Somewhat fair	Half a Page	0.5						0.666667
R_3Hkrf4GdtUGROw7	Assistant Professor	F	FALSE	43	>12	4	TRUE	FALSE			5	Perfectly	Very helpful	Fair	Half a Page	0.75						1
R_3Hkrf4GdtUGROw7	Assistant Professor	F	FALSE	49	>12	1	FALSE	FALSE			6+	Perfectly	Very helpful	Fair	Half a Page
R_T1SgPkegoLYzpOp	Postdoctoral Researcher	M	FALSE	10	10-12	0	TRUE	TRUE	TRUE	TRUE	5
R_1ff9mMbjn6Jk6g2				21
R_3fQ212EKlSpZINl	Professor	M	FALSE	18	>12	0	FALSE	TRUE	TRUE	TRUE	3
R_6sUZzmd3yP07Vtf	Professor	M	FALSE	48	7-9	0	FALSE	FALSE			4	Perfectly	Somewhat helpful	Fair	A Page
R_1eyD2oM0AERyVqW	Professor	M	FALSE	4	>12	0	FALSE	FALSE			3
R_1cYZ0dzOi14iNOS	Professor	M	FALSE	28	>12	2	FALSE	FALSE			4
R_2tgswGOgmqfNqyk	Government Researcher	M	FALSE	2	4-6	0	FALSE	TRUE	TRUE	TRUE	4	Perfectly	Somewhat helpful	Fair	A Page	0.5	0.5	0.75		0.5		0.75
R_2tgswGOgmqfNqyk	Government Researcher	M	FALSE	2	4-6	0	FALSE	TRUE	TRUE	TRUE	4	Missed some minor points	Somewhat helpful	Somewhat fair	Half a Page	0.25	0.5	0.5		0.25		0.5
R_2tgswGOgmqfNqyk	Government Researcher	M	FALSE	2	4-6	0	FALSE	TRUE	TRUE	TRUE	4	Missed some minor points	Not at all	Somewhat fair	A Page	0.25	0.75	0.75		0.25		0.75
R_2tgswGOgmqfNqyk	Government Researcher	M	FALSE	2	4-6	0	FALSE	TRUE	TRUE	TRUE	4	Perfectly	Very helpful	Fair	Multiple Pages	0.75	0.75	0.5		0.5		1
R_qW4FPNGMspSkqhX	Postdoctoral Researcher	M	FALSE	33	>12	0	TRUE	FALSE			3
R_3KQ29U7LKwoWI0x	Industry Researcher	M	FALSE	17
R_3dKOLMyf8Msabk1	Assistant Professor	M	TRUE	42	10-12	0	TRUE	TRUE	TRUE	TRUE	5	Missed some minor points	Very helpful	Fair	Multiple Pages	0.75	0.75	1	0.5	0.5	0.75	0.75
R_3dKOLMyf8Msabk1	Assistant Professor	M	TRUE	42	10-12	0	TRUE	TRUE	TRUE	TRUE	5	Perfectly	Very helpful	Fair	Multiple Pages	0.5	0.75	1	1	1	0.75	1
R_3dKOLMyf8Msabk1	Assistant Professor	M	TRUE	42	10-12	0	TRUE	TRUE	TRUE	TRUE	5	Missed some minor points	Not at all	Fair	Half a Page	1	1	1	1	1	1	1
R_3dKOLMyf8Msabk1	Assistant Professor	M	TRUE	42	10-12	0	TRUE	TRUE	TRUE	TRUE	5	Perfectly	Somewhat helpful	Fair	A Page	0.5	0.5	0.75	0.5	0.5	0.75	0.75
R_3dKOLMyf8Msabk1	Assistant Professor	M	TRUE	42	10-12	0	TRUE	TRUE	TRUE	TRUE	5	Perfectly	Somewhat helpful	Fair	A Page	0.5	0.75	0.75	0.5	0.5	0.75	0.75
R_Tc0nU97FLr8kOVb	Student	M	FALSE	53	4-6	0	TRUE	TRUE	TRUE	TRUE	3	Misunderstood major points	Not at all	Unfair	A Page	0.333333	0.666667	0.666667	0.333333	0.333333	0.666667	1
R_Tc0nU97FLr8kOVb	Student	M	FALSE	53	4-6	0	TRUE	TRUE	TRUE	TRUE	3	Missed some minor points	Somewhat helpful	Fair	A Page	0.666667	0.666667	0.666667	0.666667	0.666667	0.666667	0.666667
R_Tc0nU97FLr8kOVb	Student	M	FALSE	53	4-6	0	TRUE	TRUE	TRUE	TRUE	3	Missed some minor points	Somewhat helpful	Fair	A Page		0.666667	0.666667	0.666667	0.666667	0.666667	0.333333
R_2pYSzNwQEhUYlF9	Industry Researcher	M	FALSE	7	10-12	1	TRUE	TRUE	TRUE	FALSE	5
R_3qkAoPVAm1BRA8i	Student	M	FALSE	53	>12	1	FALSE	TRUE	TRUE	TRUE	4	Missed some minor points	Very helpful	Fair	Multiple Pages	0.5						1
R_3qkAoPVAm1BRA8i	Student	M	FALSE	53	>12	1	FALSE	TRUE	TRUE	TRUE	4	Misunderstood major points	Somewhat helpful	Fair	A Page	0.5						0.666667
R_3qkAoPVAm1BRA8i	Student	M	FALSE	53	>12	1	FALSE	TRUE	TRUE	TRUE	4	Perfectly	Very helpful	Fair	Half a Page	0.5						0.666667
R_3qkAoPVAm1BRA8i	Student	M	FALSE	53	>12	1	FALSE	TRUE	TRUE	TRUE	4	Missed some minor points	Somewhat helpful	Somewhat fair	Multiple Pages	0.5						0.333333
R_scDoSzffvcSwUGR	Student	M	FALSE	33	4-6	0	TRUE	FALSE			3	Missed some minor points	Somewhat helpful	Somewhat fair	Half a Page	1	0.666667	0.666667		0.666667	0.666667	0.333333
R_scDoSzffvcSwUGR	Student	M	FALSE	33	4-6	0	TRUE	FALSE			3	Missed some minor points	Very helpful	Fair	A Page	0.666667	0.666667	0.333333		0.666667	0.333333	0.666667
R_scDoSzffvcSwUGR	Student	M	FALSE	33	4-6	0	TRUE	FALSE			3	Missed some minor points	Somewhat helpful	Fair	A Page	0.333333	0.666667	0.333333		0.333333	0.333333	0.666667
R_ZyI64wT3b4EQCpr	Student	M	FALSE	53	4-6	1	TRUE	TRUE	TRUE	TRUE	4
R_1g2tgmddwN8Fi10	Associate Professor	M	TRUE	42	7-9	0	TRUE	TRUE	FALSE	FALSE	4
R_3O2kFNEiGrT2AJ7	Industry Researcher	M	FALSE	22	10-12	2	FALSE	TRUE	TRUE	TRUE	3
R_3NX9QhImI5HkSZN	Student	M	TRUE	48	4-6	0	TRUE	FALSE			4	Perfectly	Very helpful	Fair	A Page
R_2b36GCt9PplXmDD				55
R_2q3sRSJPAd4clqp	Other	M	TRUE	54	4-6	0	TRUE	FALSE			6+	Perfectly	Very helpful	Fair	A Page
R_wY80pgAoAVZpk4N	Industry Researcher	M	FALSE	26
R_aY08EwAVD7wrKh3	Postdoctoral Researcher	M	FALSE	27	>12	4	FALSE	FALSE			5	Missed some minor points	Somewhat helpful	Fair	A Page	0.75
R_aY08EwAVD7wrKh3	Postdoctoral Researcher	M	FALSE	27	>12	4	FALSE	FALSE			5	Perfectly	Very helpful	Fair	A Page	0.25
R_aY08EwAVD7wrKh3	Postdoctoral Researcher	M	FALSE	27	>12	4	FALSE	FALSE			5	Missed some minor points	Somewhat helpful	Fair	A Page	0.5
R_aY08EwAVD7wrKh3	Postdoctoral Researcher	M	FALSE	27	>12	4	FALSE	FALSE			5	Perfectly	Very helpful	Fair	A Page	0.5
R_aY08EwAVD7wrKh3	Postdoctoral Researcher	M	FALSE	27	>12	4	FALSE	FALSE			5	Perfectly	Somewhat helpful	Fair	Half a Page	0.75
R_1KjLdHUHwBQMuhy	Student	M	FALSE	40	4-6	1	FALSE	TRUE	TRUE	TRUE	3	Perfectly	Very helpful	Fair	Half a Page
R_etZZw627uYXqknv	Assistant Professor	M	FALSE	22	7-9	0	FALSE	TRUE	TRUE	TRUE	4	Perfectly	Somewhat helpful	Fair	Half a Page	0.75						0.666667
R_etZZw627uYXqknv	Assistant Professor	M	FALSE	22	7-9	0	FALSE	TRUE	TRUE	TRUE	4	Perfectly	Somewhat helpful	Somewhat fair	A Page	0.75						0.333333
R_etZZw627uYXqknv	Assistant Professor	M	FALSE	22	7-9	0	FALSE	TRUE	TRUE	TRUE	4	Missed some minor points	Not at all	Somewhat fair	Half a Page	0.5						1
R_etZZw627uYXqknv	Assistant Professor	M	FALSE	22	7-9	0	FALSE	TRUE	TRUE	TRUE	4	Missed some minor points	Somewhat helpful	Fair	Half a Page	0.75						0.333333
R_23TU5gDSBhcopQQ	Postdoctoral Researcher	M	FALSE	34
R_ByLVuJyplyrr2Bb	Professor	M	FALSE	18	10-12	0	FALSE	FALSE			3
R_22XGKfF0sTanHfH	Student	M	FALSE	22	4-6	2	FALSE	TRUE	TRUE	TRUE	4
R_21cBXebIXBUdCqH	Student	M	FALSE	20	7-9	0	FALSE	TRUE	TRUE	TRUE	6+	Missed some minor points	Very helpful	Fair	A Page	1
R_21cBXebIXBUdCqH	Student	M	FALSE	20	7-9	0	FALSE	TRUE	TRUE	TRUE	6+	Missed some minor points	Somewhat helpful	Fair	A Page	0.666667
R_21cBXebIXBUdCqH	Student	M	FALSE	20	7-9	0	FALSE	TRUE	TRUE	TRUE	6+	Missed some minor points	Somewhat helpful	Fair	A Page	0.666667
R_21cBXebIXBUdCqH	Student	M	FALSE	20	7-9	0	FALSE	TRUE	TRUE	TRUE	6+	Perfectly	Very helpful	Fair	Half a Page	1
R_21cBXebIXBUdCqH	Student	M	FALSE	20	7-9	0	FALSE	TRUE	TRUE	TRUE	6+	Perfectly	Very helpful	Fair	Half a Page	0.666667
R_21cBXebIXBUdCqH	Student	M	FALSE	20	7-9	0	FALSE	TRUE	TRUE	TRUE	6+	Missed some minor points	Somewhat helpful	Somewhat fair	Half a Page	0.333333
R_2ZHPH2GaUgMLRnM	Assistant Professor	M	TRUE	48	4-6	0	TRUE	FALSE			4	Perfectly	Somewhat helpful	Fair	A Page
R_oYMLMYFBpdaQHn3	Student	M	FALSE	56	1-3	1	TRUE	TRUE	TRUE	TRUE	3	Perfectly	Very helpful	Fair	A Page
R_2AYclqIRBB5gpEG				45
R_1pJWGX3gbzGL71H	Assistant Professor	M	FALSE	56	>12	0	TRUE	TRUE	TRUE	TRUE	3
R_27U1plAfA5Gae8W	Industry Researcher	M	TRUE	53	7-9	0	TRUE	TRUE	TRUE	TRUE	3
R_1Nx0fUo1fwvY5Jn	Student	M	FALSE	54	>12	1	FALSE	FALSE			5	Missed some minor points	Somewhat helpful	Fair	A Page	0.75						0.666667
R_1Nx0fUo1fwvY5Jn	Student	M	FALSE	54	>12	1	FALSE	FALSE			5	Misunderstood major points	Not at all	Unfair	A Page	0.5						0.666667
R_1Nx0fUo1fwvY5Jn	Student	M	FALSE	54	>12	1	FALSE	FALSE			5	Missed some minor points	Somewhat helpful	Somewhat fair	A Page	0.75						0.666667
R_1Nx0fUo1fwvY5Jn	Student	M	FALSE	54	>12	1	FALSE	FALSE			5	Perfectly	Very helpful	Fair	Multiple Pages	0.75						0.666667
R_1Nx0fUo1fwvY5Jn	Student	M	FALSE	54	>12	1	FALSE	FALSE			5	Missed some minor points	Somewhat helpful	Fair	A Page	0.5						0.666667
R_z2aHvby25FoUk93	Student	M	FALSE	3	1-3	0	FALSE	TRUE	TRUE	TRUE	3
R_wY2Wk0TZIFaOeMp				7
R_2DUMPBcyt3IZahE	Industry Researcher	M	FALSE	54	10-12	2	FALSE	FALSE			4
R_1hTneDytggQVi3Q	Student		FALSE	7	4-6	1	FALSE	FALSE			4
R_RKLjmKcr1JTkmcN	Assistant Professor	M	FALSE	10
R_3OrL5XKwq1JNgeZ	Professor	F	TRUE	31	10-12	2	TRUE	FALSE			4
R_3fpGwc31OQv4dOz	Professor	F	FALSE	40	10-12	1	FALSE	FALSE			3				Half a Page
R_0823XDOVbAQeLS1	Associate Professor	M	TRUE	53	10-12	0	TRUE	TRUE	TRUE	TRUE	5	Missed some minor points	Somewhat helpful	Fair	A Page
R_1mLcFCQuPzOfLvy	Associate Professor	M	TRUE	53	7-9	0	TRUE	TRUE	TRUE	TRUE	3	Perfectly	Somewhat helpful	Fair	A Page	0.75						1
R_1mLcFCQuPzOfLvy	Associate Professor	M	TRUE	53	7-9	0	TRUE	TRUE	TRUE	TRUE	3	Missed some minor points	Somewhat helpful	Fair	Half a Page	0.75						1
R_1mLcFCQuPzOfLvy	Associate Professor	M	TRUE	53	7-9	0	TRUE	TRUE	TRUE	TRUE	3	Missed some minor points	Somewhat helpful	Fair	A Page	0.5						1
R_2Pz0cgPlIkFaafA	Assistant Professor	M	FALSE	36	7-9	0	FALSE	FALSE			3	Perfectly	Somewhat helpful	Fair	A Page
R_Y96QKGjvs6sLNaF	Professor	F	TRUE	9			TRUE
R_V3YDqOC4Fcy8RsB	Student	M	FALSE	15	10-12	2	FALSE	FALSE			4				Half a Page	0.333333	0.333333	0.666667	0.333333	0.333333	0.666667	0.666667
R_V3YDqOC4Fcy8RsB	Student	M	FALSE	15	10-12	2	FALSE	FALSE			4	Missed some minor points	Somewhat helpful	Fair	Half a Page	0.666667	0.666667	0.666667	0.666667	0.333333	0.666667	0.666667
R_V3YDqOC4Fcy8RsB	Student	M	FALSE	15	10-12	2	FALSE	FALSE			4				Half a Page	0.666667	0.666667	0.666667	0.333333	0.666667	0.666667	0.666667
R_V3YDqOC4Fcy8RsB	Student	M	FALSE	15	10-12	2	FALSE	FALSE			4	Missed some minor points	Somewhat helpful	Somewhat fair	Half a Page	0.333333	0.333333	0.666667	0.666667	0.333333	0.666667	0.666667
R_V3YDqOC4Fcy8RsB	Student	M	FALSE	23	10-12	0	FALSE	FALSE			4	Misunderstood major points	Somewhat helpful	Somewhat fair	Half a Page	0.333333	0.333333	0.666667	0.666667	0.333333	0.666667	0.333333
R_V3YDqOC4Fcy8RsB	Student	M	FALSE	23	10-12	0	FALSE	FALSE			4	Missed some minor points	Somewhat helpful	Somewhat fair	Half a Page	0.333333	0.333333	0.666667	0.666667	0.333333	0.666667	0.666667
R_V3YDqOC4Fcy8RsB	Student	M	FALSE	23	10-12	0	FALSE	FALSE			4	Missed some minor points	Somewhat helpful	Somewhat fair	Half a Page	0.666667	0.666667	0.666667	0.666667	0.333333	0.666667	0.666667
R_V3YDqOC4Fcy8RsB	Student	M	FALSE	23	10-12	0	FALSE	FALSE			4	Perfectly	Very helpful	Fair	A Page	0.666667	0.333333	0.333333	0.333333	0.666667	0.666667	0.666667
R_1jBevhYTKZ77Oo7	Student	M	FALSE	3
R_1ple54ELHhhwIac	Assistant Professor	M	FALSE	18	7-9	2	FALSE	TRUE	TRUE	TRUE	3	Perfectly	Somewhat helpful	Fair	Multiple Pages
R_3fW46KBJ0yYoXBS	Assistant Professor	M	FALSE	35	10-12	1	FALSE	TRUE	TRUE	TRUE	6+	Missed some minor points	Somewhat helpful	Fair	A Page	0.666667
R_3fW46KBJ0yYoXBS	Assistant Professor	M	FALSE	35	10-12	1	FALSE	TRUE	TRUE	TRUE	6+	Missed some minor points	Very helpful	Fair	A Page	1
R_3fW46KBJ0yYoXBS	Assistant Professor	M	FALSE	35	10-12	1	FALSE	TRUE	TRUE	TRUE	6+	Missed some minor points	Somewhat helpful	Fair	A Page	1
R_3fW46KBJ0yYoXBS	Assistant Professor	M	FALSE	35	10-12	1	FALSE	TRUE	TRUE	TRUE	6+	Missed some minor points	Somewhat helpful	Fair	A Page	1
R_3fW46KBJ0yYoXBS	Assistant Professor	M	FALSE	35	10-12	1	FALSE	TRUE	TRUE	TRUE	6+	Missed some minor points	Very helpful		A Page	1
R_3fW46KBJ0yYoXBS	Assistant Professor	M	FALSE	35	10-12	1	FALSE	TRUE	TRUE	TRUE	6+	Missed some minor points	Somewhat helpful	Fair	A Page	0.666667
R_1d5JD3AbHtByQXI	Professor	M	FALSE	3	7-9	0	FALSE	TRUE	TRUE	TRUE	4	Perfectly	Not at all		1-2 Paragraphs
R_2wdGei6vlgFHUJT	Student		FALSE	12	>12	0	FALSE	TRUE	TRUE	TRUE	2	Perfectly	Very helpful	Fair	Half a Page	0.5	1	0.75	0.75	0.75	1	0.75
R_2wdGei6vlgFHUJT	Student		FALSE	12	>12	0	FALSE	TRUE	TRUE	TRUE	2	Perfectly	Somewhat helpful	Somewhat fair	Half a Page	0.75	1	1	0.75	0.75	0.75	0.75
R_2QYbrCjPFTO7aW1	Professor		TRUE	9			TRUE
R_1lrYo7H9bLUPcW5	Professor	M	TRUE	38	>12	0	TRUE	TRUE	TRUE	FALSE	5	Missed some minor points	Somewhat helpful	Fair	A Page	0.666667		0.333333		0.333333		0.333333
R_1lrYo7H9bLUPcW5	Professor	M	TRUE	38	>12	0	TRUE	TRUE	TRUE	FALSE	5	Missed some minor points	Somewhat helpful	Fair	1-2 Paragraphs	0.666667		0.666667		0.666667		0.666667
R_1lrYo7H9bLUPcW5	Professor	M	TRUE	38	>12	0	TRUE	TRUE	TRUE	FALSE	5	Misunderstood major points	Somewhat helpful	Somewhat fair	A Page	1		1		0.666667		0.333333
R_1lrYo7H9bLUPcW5	Professor	M	TRUE	38	>12	0	TRUE	TRUE	TRUE	FALSE	5	Perfectly	Not at all	Fair	1-2 Paragraphs	1		1		0.666667		0.666667
R_1lrYo7H9bLUPcW5	Professor	M	TRUE	5	1-3	0	TRUE	FALSE			4	Misunderstood major points	Not at all	Unfair	A Page	0.166667						0.5
R_1lrYo7H9bLUPcW5	Professor	M	TRUE	5	1-3	0	TRUE	FALSE			4	Perfectly	Somewhat helpful	Fair	1-2 Paragraphs	1						0.5
R_1lrYo7H9bLUPcW5	Professor	M	TRUE	5	1-3	0	TRUE	FALSE			4	Perfectly	Not at all	Fair	Half a Page	0.666667						0.5
R_1lrYo7H9bLUPcW5	Professor	M	TRUE	5	1-3	0	TRUE	FALSE			4	Missed some minor points	Somewhat helpful	Fair	Half a Page	0.833333						1
R_2vixd60enaghJOk				45
R_1GH2tQ3l7uFuTix	Professor	M	TRUE	38	7-9	0	TRUE	FALSE			5
R_vOeo8pGrkAanRDP	Student	M	TRUE	37	10-12	1	TRUE	FALSE			5	Perfectly	Somewhat helpful	Fair	Half a Page	1	0.75					0.333333
R_vOeo8pGrkAanRDP	Student	M	TRUE	37	10-12	1	TRUE	FALSE			5	Missed some minor points	Somewhat helpful	Fair	Half a Page	0.25	0.5					0.333333
R_vOeo8pGrkAanRDP	Student	M	TRUE	37	10-12	1	TRUE	FALSE			5	Perfectly	Somewhat helpful	Fair	1-2 Paragraphs	0.5	0.5					0.333333
R_vOeo8pGrkAanRDP	Student	M	TRUE	37	10-12	1	TRUE	FALSE			5	Perfectly	Not at all	Fair	A Page	1	0.5					0.666667
R_vOeo8pGrkAanRDP	Student	M	TRUE	37	10-12	1	TRUE	FALSE			5	Perfectly	Very helpful	Fair	A Page	0.75	0.5					0
R_3sIRap5cylJgwff	Industry Researcher	M	FALSE	16	>12	1	FALSE	FALSE			5	Perfectly	Very helpful	Fair	A Page	0.666667	0.666667	1	1	0.666667	1	0.666667
R_3sIRap5cylJgwff	Industry Researcher	M	FALSE	16	>12	1	FALSE	FALSE			5	Perfectly	Somewhat helpful	Fair	Half a Page	1	1	1	1	1	1	0.666667
R_3sIRap5cylJgwff	Industry Researcher	M	FALSE	16	>12	1	FALSE	FALSE			5	Misunderstood major points	Somewhat helpful	Somewhat fair	Half a Page	0.666667	0.666667	1	1	0.333333	0.333333	0.666667
R_3sIRap5cylJgwff	Industry Researcher	M	FALSE	16	>12	1	FALSE	FALSE			5	Perfectly	Very helpful	Fair	A Page	0.333333	0.333333	1	1	0.333333	1	0.666667
R_3sIRap5cylJgwff	Industry Researcher	M	FALSE	16	>12	1	FALSE	FALSE			5	Perfectly	Very helpful	Fair	Multiple Pages	0.333333	0.666667	1	1	0.333333	1	0.666667
R_3iX6kxzhr85bP9u	Student	M	FALSE	46	10-12	2	FALSE	TRUE	TRUE	TRUE	3	Perfectly	Somewhat helpful	Fair	Half a Page	0.75			0.5			0.666667
R_3iX6kxzhr85bP9u	Student	M	FALSE	46	10-12	2	FALSE	TRUE	TRUE	TRUE	3	Perfectly	Somewhat helpful	Fair	Half a Page	0.5			0.5			0.666667
R_3iX6kxzhr85bP9u	Student	M	FALSE	46	10-12	2	FALSE	TRUE	TRUE	TRUE	3	Perfectly	Somewhat helpful	Fair	A Page	0.75			0.75			0.666667
R_3iX6kxzhr85bP9u	Student	M	FALSE	46	7-9	3	FALSE	TRUE	FALSE	TRUE	4	Perfectly	Very helpful	Fair	A Page	0.5			0.5			0.666667
R_3iX6kxzhr85bP9u	Student	M	FALSE	46	7-9	3	FALSE	TRUE	FALSE	TRUE	4	Perfectly	Somewhat helpful	Somewhat fair	A Page	0.25			0.5			1
R_3iX6kxzhr85bP9u	Student	M	FALSE	46	7-9	3	FALSE	TRUE	FALSE	TRUE	4	Perfectly	Very helpful	Fair	A Page	0.5			1			0.666667
R_3iX6kxzhr85bP9u	Student	M	FALSE	46	7-9	3	FALSE	TRUE	FALSE	TRUE	4	Perfectly	Somewhat helpful	Fair	A Page
R_1Q5tOHA27A3ChHf	Assistant Professor	M	FALSE	35	>12	0	FALSE	FALSE			5
R_sHBLBTOdbOlnKtb	Industry Researcher	M	TRUE	55	>12	0	TRUE	TRUE	TRUE	TRUE	4	Missed some minor points	Very helpful	Fair	A Page
R_2Sv0Q7Aggp0KBOe	Student	M	FALSE	6	>12	1	TRUE	TRUE	TRUE	TRUE	5	Missed some minor points	Somewhat helpful	Fair	A Page	0.666667	0.666667	0.666667	0.666667	0.666667	0.666667	0.666667
R_2Sv0Q7Aggp0KBOe	Student	M	FALSE	6	>12	1	TRUE	TRUE	TRUE	TRUE	5	Missed some minor points	Somewhat helpful	Fair	A Page	0.666667	0.666667	0.666667	0.666667	0.666667	0.666667	0.666667
R_2Sv0Q7Aggp0KBOe	Student	M	FALSE	6	>12	1	TRUE	TRUE	TRUE	TRUE	5	Missed some minor points	Somewhat helpful	Fair	A Page	0.666667	0.666667	0.666667	0.666667	0.666667	0.666667	0.666667
R_2Sv0Q7Aggp0KBOe	Student	M	FALSE	6	>12	1	TRUE	TRUE	TRUE	TRUE	5	Missed some minor points	Somewhat helpful	Somewhat fair	A Page	0.666667	0.666667	0.666667	0.666667	0.666667	0.666667	0.666667
R_2Sv0Q7Aggp0KBOe	Student	M	FALSE	6	>12	1	TRUE	TRUE	TRUE	TRUE	5	Missed some minor points	Very helpful	Fair	A Page	0.333333	0.333333	0.333333	0.333333	0.333333	0.333333	0.333333
R_1gINpqxF9VhLMBU	Associate Professor	F	FALSE	20	10-12	0	FALSE	TRUE	TRUE	TRUE	4
R_2YE8ocq85Rr85sG	Industry Researcher	M	TRUE	3			TRUE
R_ulZ1WPOSgKWG1Z7	Industry Researcher	M	TRUE	46			TRUE
R_1E746WAhEnSfbYb	Student	M	FALSE	34	>12	1	FALSE	TRUE	TRUE	TRUE	4	Missed some minor points	Somewhat helpful	Somewhat fair	Half a Page	0.75	1	0.666667	0.666667	1	1	0.666667
R_1E746WAhEnSfbYb	Student	M	FALSE	34	>12	1	FALSE	TRUE	TRUE	TRUE	4	Perfectly	Somewhat helpful	Fair	A Page	0.75	1	0.666667	0.666667	1	1	1
R_1E746WAhEnSfbYb	Student	M	FALSE	34	>12	1	FALSE	TRUE	TRUE	TRUE	4	Missed some minor points	Somewhat helpful	Somewhat fair	Half a Page	0.5	0.666667	0.666667	0.333333	0.666667	0.666667	0.333333
R_1E746WAhEnSfbYb	Student	M	FALSE	34	>12	1	FALSE	TRUE	TRUE	TRUE	4	Missed some minor points	Somewhat helpful	Somewhat fair	1-2 Paragraphs	0.5	0.333333	1	0.666667	0.666667	0.333333	0.333333
R_2UirMFYbz01C5LB	Assistant Professor	M	FALSE	4	10-12	1	FALSE	FALSE			3	Missed some minor points			Half a Page	0.666667
R_2UirMFYbz01C5LB	Assistant Professor	M	FALSE	4	10-12	1	FALSE	FALSE			3	Misunderstood major points	Not at all	Somewhat fair	Half a Page	0.333333
R_2UirMFYbz01C5LB	Assistant Professor	M	FALSE	4	10-12	1	FALSE	FALSE			3	Perfectly	Very helpful	Fair	A Page	0.666667
R_1dAeU1JnAff7cNQ	Professor	M	TRUE	52	1-3	0	TRUE	FALSE			3
R_1dtVKcaxmejyhQk	Student	M	FALSE	7
R_ALFe8jLATpA7F4t	Professor	M	TRUE	14	>12	0	TRUE	TRUE	TRUE	TRUE	5
R_24kmseQnmBbbpL3	Student	M	FALSE	45	>12	1	FALSE	FALSE			4
R_3is8R4KPU0MrP4K	Student	M	FALSE	16	>12	2	TRUE	FALSE			4
R_z76AqN2HxhJcBYR	Student	M	FALSE	11	>12	0	TRUE	FALSE			4	Missed some minor points	Somewhat helpful	Fair	Half a Page	0.777778	0.777778	1	0.777778	1	0.444444	0.666667
R_z76AqN2HxhJcBYR	Student	M	FALSE	11	>12	0	TRUE	FALSE			4	Missed some minor points	Somewhat helpful	Fair	Half a Page	0.777778	0.777778	1	0.666667	0.666667	0.666667	0.666667
R_z76AqN2HxhJcBYR	Student	M	FALSE	11	>12	0	TRUE	FALSE			4	Missed some minor points	Somewhat helpful	Fair	Half a Page	0.444444	0.555556	0.666667	0.444444	0.555556	0.666667	0.555556
R_z76AqN2HxhJcBYR	Student	M	FALSE	11	>12	0	TRUE	FALSE			4	Missed some minor points	Somewhat helpful	Fair	Half a Page	0.444444	0.555556	0.666667	0.444444	0.555556	0.666667	0.444444
R_3oAvhBG2DjJ05xT	Assistant Professor	M	FALSE	44	4-6	0	FALSE	TRUE	FALSE	FALSE	4	Perfectly	Somewhat helpful	Fair	A Page
R_qLp8W1mMAYFtqAp	Student	M	FALSE	53	4-6	0	FALSE	TRUE	TRUE	TRUE	4	Perfectly	Very helpful	Fair	A Page	0.5
R_qLp8W1mMAYFtqAp	Student	M	FALSE	53	4-6	0	FALSE	TRUE	TRUE	TRUE	4	Perfectly	Very helpful	Fair	A Page	0.5
R_qLp8W1mMAYFtqAp	Student	M	FALSE	53	4-6	0	FALSE	TRUE	TRUE	TRUE	4	Missed some minor points	Somewhat helpful	Fair	A Page	0.25
R_qLp8W1mMAYFtqAp	Student	M	FALSE	53	4-6	0	FALSE	TRUE	TRUE	TRUE	4	Perfectly	Very helpful	Fair	A Page	0.5
R_2zvHNl8Hc7alUIv	Associate Professor	M	TRUE	45	>12	0	TRUE	TRUE	TRUE	TRUE	4	Missed some minor points	Very helpful	Fair	1-2 Paragraphs	0.5
R_2zvHNl8Hc7alUIv	Associate Professor	M	TRUE	45	>12	0	TRUE	TRUE	TRUE	TRUE	4	Perfectly	Very helpful	Fair	Half a Page	1
R_2zvHNl8Hc7alUIv	Associate Professor	M	TRUE	45	>12	0	TRUE	TRUE	TRUE	TRUE	4	Missed some minor points	Very helpful	Fair	1-2 Paragraphs	0.5
R_2zvHNl8Hc7alUIv	Associate Professor	M	TRUE	45	>12	0	TRUE	TRUE	TRUE	TRUE	4	Probably didn't read it	Not at all	Somewhat fair	1-2 Paragraphs	0
R_2ZNshIPMboVUqjx	Assistant Professor		FALSE	1
R_XIj5yEMEBh4zI5P	Industry Researcher	F	TRUE	50	>12	1	TRUE	TRUE	TRUE	TRUE	4	Missed some minor points	Somewhat helpful	Fair	A Page
R_2pS2HN2V9q6WCa2	Student	M	TRUE	34	>12	1	TRUE	TRUE	TRUE	TRUE	5	Missed some minor points	Somewhat helpful	Somewhat fair	Half a Page	0.75		0.5	0.75	0.75		0
R_2pS2HN2V9q6WCa2	Student	M	TRUE	34	>12	1	TRUE	TRUE	TRUE	TRUE	5	Missed some minor points	Very helpful	Fair	Multiple Pages	0.5		0.5	0.25	0.5		0.5
R_2pS2HN2V9q6WCa2	Student	M	TRUE	34	>12	1	TRUE	TRUE	TRUE	TRUE	5	Missed some minor points	Very helpful	Somewhat fair	A Page	0.75		0.75	0.5	0.75		0.25
R_2pS2HN2V9q6WCa2	Student	M	TRUE	34	>12	1	TRUE	TRUE	TRUE	TRUE	5	Missed some minor points	Very helpful	Fair	A Page	0.5		0.75	0.5	0.5		0.5
R_2pS2HN2V9q6WCa2	Student	M	TRUE	34	>12	1	TRUE	TRUE	TRUE	TRUE	5	Missed some minor points	Very helpful	Fair	A Page	0.5		0.75	0.5	0.75		0.5
R_3HIeklZyeBoEr0u	Student	M	TRUE	50	7-9	0	TRUE	TRUE	TRUE	TRUE	6+	Missed some minor points	Somewhat helpful	Fair	Multiple Pages					0.666667		1
R_3HIeklZyeBoEr0u	Student	M	TRUE	50	7-9	0	TRUE	TRUE	TRUE	TRUE	6+	Missed some minor points	Not at all	Somewhat fair	Half a Page					0.333333		1
R_3HIeklZyeBoEr0u	Student	M	TRUE	50	7-9	0	TRUE	TRUE	TRUE	TRUE	6+	Perfectly	Very helpful	Fair	A Page					0.666667		1
R_3HIeklZyeBoEr0u	Student	M	TRUE	50	7-9	0	TRUE	TRUE	TRUE	TRUE	6+	Missed some minor points	Not at all	Fair	Half a Page					0.666667		1
R_3HIeklZyeBoEr0u	Student	M	TRUE	50	7-9	0	TRUE	TRUE	TRUE	TRUE	6+	Missed some minor points	Somewhat helpful	Fair	Multiple Pages					0.666667		0.666667
R_3HIeklZyeBoEr0u	Student	M	TRUE	50	7-9	0	TRUE	TRUE	TRUE	TRUE	6+	Misunderstood major points	Very helpful	Unfair	A Page					0.333333		1
R_bIoJIQCUfX1LO2B	Student	F	FALSE	28	10-12	1	FALSE	FALSE			3
R_3EtZLkUg4zZWfo7	Associate Professor	M	FALSE	26	>12	0	FALSE	TRUE	TRUE	TRUE	6+	Perfectly	Very helpful	Fair	Multiple Pages
R_pQcpwevoSjoHQ5j	Industry Researcher	M	FALSE	31
R_1GPH5bOnb4RHExi	Student	M	FALSE	14	>12	4	TRUE	TRUE	TRUE	TRUE	5	Missed some minor points	Somewhat helpful	Somewhat fair	Half a Page	0.5	0.5	0.5	0.5	0.5	0.5	0.5
R_1GPH5bOnb4RHExi	Student	M	FALSE	14	>12	4	TRUE	TRUE	TRUE	TRUE	5	Missed some minor points	Somewhat helpful	Somewhat fair	Half a Page	0.5	0.5	0.5	0.5	0.5	0.5	0.5
R_1GPH5bOnb4RHExi	Student	M	FALSE	14	>12	4	TRUE	TRUE	TRUE	TRUE	5	Missed some minor points	Somewhat helpful	Somewhat fair	Half a Page	0.5	0.5	0.5	0.5	0.5	0.5	0.5
R_1GPH5bOnb4RHExi	Student	M	FALSE	14	>12	4	TRUE	TRUE	TRUE	TRUE	5	Missed some minor points	Not at all	Somewhat fair	1-2 Paragraphs	0.5	0.5	0.5	0.5	0.5	0.5	0.5
R_1GPH5bOnb4RHExi	Student	M	FALSE	14	>12	4	TRUE	TRUE	TRUE	TRUE	5	Misunderstood major points	Not at all	Unfair	1-2 Paragraphs	0.25	0.25	0.25	0.25	0.25	0.25	0.25
R_UPEUBE1DD6L53NL	Government Researcher	M	FALSE	30	4-6	0	TRUE	TRUE	TRUE	TRUE	4
R_1mjW0kUeZOu7dxr	Student	M	FALSE	9	>12	1	TRUE	TRUE	TRUE	TRUE	5	Missed some minor points	Very helpful	Fair	A Page
R_3lEA20Ozs8dXLLt	Associate Professor	M	TRUE	31	10-12	0	TRUE	TRUE	TRUE	TRUE	5	Perfectly	Somewhat helpful	Fair	Half a Page
R_1FhOqghXB6GnsVX	Associate Professor	M	TRUE	26	10-12	0	TRUE	TRUE	TRUE	TRUE	6+	Missed some minor points	Somewhat helpful	Fair	Multiple Pages	0.75	1	0.666667	1	1		0.333333
R_1FhOqghXB6GnsVX	Associate Professor	M	TRUE	26	10-12	0	TRUE	TRUE	TRUE	TRUE	6+	Missed some minor points	Somewhat helpful	Fair	A Page	1	0.666667	1	0.666667	1		0.666667
R_1FhOqghXB6GnsVX	Associate Professor	M	TRUE	26	10-12	0	TRUE	TRUE	TRUE	TRUE	6+	Missed some minor points	Very helpful	Somewhat fair	Multiple Pages	0.5	0.333333	0.333333	1	0.333333		1
R_1FhOqghXB6GnsVX	Associate Professor	M	TRUE	26	10-12	0	TRUE	TRUE	TRUE	TRUE	6+	Missed some minor points	Very helpful	Fair	A Page	0.5	0.333333	0.333333	1	0.666667		1
R_1FhOqghXB6GnsVX	Associate Professor	M	TRUE	26	10-12	0	TRUE	TRUE	TRUE	TRUE	6+	Perfectly	Very helpful	Fair	Multiple Pages	0.5	0.666667	0.333333	1	0.666667		0.333333
R_1FhOqghXB6GnsVX	Associate Professor	M	TRUE	26	10-12	0	TRUE	TRUE	TRUE	TRUE	6+	Misunderstood major points	Somewhat helpful	Unfair	A Page	0	0.666667	0.666667	1	0		1
R_3Myu56ucMzBLTa3	Student	M	FALSE	12	7-9	0	FALSE	TRUE	TRUE	TRUE	6+	Missed some minor points	Somewhat helpful	Somewhat fair	A Page	0.666667	0.666667	1	1	1	1	0.333333
R_3Myu56ucMzBLTa3	Student	M	FALSE	12	7-9	0	FALSE	TRUE	TRUE	TRUE	6+	Perfectly	Not at all	Somewhat fair	1-2 Paragraphs	1	1	1	1	1	1	0.666667
R_3Myu56ucMzBLTa3	Student	M	FALSE	12	7-9	0	FALSE	TRUE	TRUE	TRUE	6+	Missed some minor points	Somewhat helpful	Somewhat fair	1-2 Paragraphs	0.333333	1	1	1	0.333333	1	1
R_3Myu56ucMzBLTa3	Student	M	FALSE	12	7-9	0	FALSE	TRUE	TRUE	TRUE	6+	Missed some minor points	Somewhat helpful	Unfair	A Page	0.333333	0.666667	1	1	0.333333	1	1
R_3Myu56ucMzBLTa3	Student	M	FALSE	12	7-9	0	FALSE	TRUE	TRUE	TRUE	6+	Missed some minor points	Very helpful	Fair	1-2 Paragraphs	1	1	1	1	1	1	0.666667
R_3Myu56ucMzBLTa3	Student	M	FALSE	12	7-9	0	FALSE	TRUE	TRUE	TRUE	6+	Missed some minor points	Somewhat helpful	Fair	A Page	0.333333	1	1	1	0.333333	1	1
R_3hsA7gBwhQMXBh0	Student	M	FALSE	2	>12	1	FALSE	TRUE	TRUE	TRUE	6+	Perfectly	Very helpful	Fair	1-2 Paragraphs	0.75	0.666667		0.333333	0.666667	1	0.666667
R_3hsA7gBwhQMXBh0	Student	M	FALSE	2	>12	1	FALSE	TRUE	TRUE	TRUE	6+	Missed some minor points	Very helpful	Fair	Half a Page	1	1		0.666667	0.666667	1	1
R_3hsA7gBwhQMXBh0	Student	M	FALSE	2	>12	1	FALSE	TRUE	TRUE	TRUE	6+	Missed some minor points	Somewhat helpful	Somewhat fair	1-2 Paragraphs	1	1		0.666667	0.333333	1	0.666667
R_3hsA7gBwhQMXBh0	Student	M	FALSE	2	>12	1	FALSE	TRUE	TRUE	TRUE	6+	Perfectly	Very helpful	Somewhat fair	1-2 Paragraphs	0.75	0.666667		0.666667	0.666667	0.666667	0.666667
R_3hsA7gBwhQMXBh0	Student	M	FALSE	2	>12	1	FALSE	TRUE	TRUE	TRUE	6+	Missed some minor points	Somewhat helpful	Fair	1-2 Paragraphs	0.5	1		0.666667	0.333333	0.666667	0.333333
R_3hsA7gBwhQMXBh0	Student	M	FALSE	2	>12	1	FALSE	TRUE	TRUE	TRUE	6+	Missed some minor points	Somewhat helpful	Somewhat fair	1-2 Paragraphs	0.5	1		0.333333	0.666667	1	0.666667
R_3hsA7gBwhQMXBh0	Student	M	FALSE	9	7-9	1	TRUE	TRUE	TRUE	TRUE	4	Perfectly	Very helpful	Fair	1-2 Paragraphs	1	1		1	0.333333	1	1
R_3hsA7gBwhQMXBh0	Student	M	FALSE	9	7-9	1	TRUE	TRUE	TRUE	TRUE	4	Missed some minor points	Somewhat helpful	Somewhat fair	1-2 Paragraphs	0.75	1		0.666667	0.666667	1	1
R_3hsA7gBwhQMXBh0	Student	M	FALSE	9	7-9	1	TRUE	TRUE	TRUE	TRUE	4	Perfectly	Very helpful	Fair	1-2 Paragraphs	0.5	0.666667		0.333333	0.333333	1	0.666667
R_3hsA7gBwhQMXBh0	Student	M	FALSE	9	7-9	1	TRUE	TRUE	TRUE	TRUE	4	Perfectly	Very helpful	Fair	1-2 Paragraphs	0.75	1		0.666667	0.666667	1	0.666667
R_3lWTI5atgtN7Rt8	Government Researcher	M	FALSE	30
R_3j1GdW4gb5tMbEk	Professor	M	FALSE	28	7-9	0	FALSE	FALSE			3	Perfectly	Somewhat helpful	Fair	A Page
R_210OmZXeNkq7TVi	Assistant Professor	M	FALSE	10	>12	2	FALSE	TRUE	TRUE	TRUE	5
R_3s18LWSYRsZ1zm9	Student	M	FALSE	18	7-9	0	FALSE	TRUE	TRUE	TRUE	3	Missed some minor points	Very helpful	Fair	A Page
R_yBzfVChi3j7jEDn				31
R_bvHTZTEIxeqP47n	Student	M	FALSE	2	4-6	1	TRUE	TRUE	TRUE	TRUE	5	Perfectly	Very helpful	Fair	Multiple Pages	0.75	0.5	0.5		0.666667		1
R_bvHTZTEIxeqP47n	Student	M	FALSE	2	4-6	1	TRUE	TRUE	TRUE	TRUE	5	Missed some minor points	Somewhat helpful	Somewhat fair	A Page	0.75	0.5	0.75		0.333333		0.75
R_bvHTZTEIxeqP47n	Student	M	FALSE	2	4-6	1	TRUE	TRUE	TRUE	TRUE	5	Missed some minor points	Somewhat helpful	Somewhat fair	A Page	0.75	0.75	0.75		0.333333		0.5
R_bvHTZTEIxeqP47n	Student	M	FALSE	2	4-6	1	TRUE	TRUE	TRUE	TRUE	5	Missed some minor points	Very helpful	Fair	Multiple Pages	0.75	0.5	0.75		0.333333		1
R_bvHTZTEIxeqP47n	Student	M	FALSE	2	4-6	1	TRUE	TRUE	TRUE	TRUE	5	Missed some minor points	Somewhat helpful	Somewhat fair	1-2 Paragraphs	0.75	0.75	0.75		0.333333		0.75
R_xzMz1Pv2eLp6HrH	Student		FALSE	10	10-12	1	FALSE	TRUE	TRUE	TRUE	5
R_xzMz1Pv2eLp6HrH	Student		FALSE	37	7-9	0	FALSE	FALSE			4	Missed some minor points	Somewhat helpful	Fair	1-2 Paragraphs	0.5	1					0.666667
R_xzMz1Pv2eLp6HrH	Student		FALSE	37	7-9	0	FALSE	FALSE			4	Perfectly	Very helpful	Fair	Multiple Pages	0.75	0.5					0.666667
R_xzMz1Pv2eLp6HrH	Student		FALSE	37	7-9	0	FALSE	FALSE			4	Missed some minor points	Somewhat helpful	Fair	A Page	0.75	0.5					0.333333
R_xzMz1Pv2eLp6HrH	Student		FALSE	37	7-9	0	FALSE	FALSE			4	Missed some minor points	Somewhat helpful	Fair	1-2 Paragraphs	0.75	0.75					0.333333
R_RQuaQCQ7hjdQSkx	Associate Professor	M	TRUE	4	4-6	0	TRUE	FALSE			3	Perfectly	Somewhat helpful	Fair	Half a Page
R_3JbkZJi2PWz5U6p				5
R_2tg57fY5pEKwad7	Government Researcher	M	FALSE	19
R_30cQxK5VLL5d7lo				7
R_24r8xJdNCjV1Ur0	Assistant Professor	F	FALSE	2	7-9	0	TRUE	TRUE	TRUE	TRUE	5
R_1NaZRUfIE7OZAo3				34
R_3JsKjfsT3VJJjRx	Student	M	TRUE	14	10-12	0	TRUE	TRUE	TRUE	TRUE	5	Perfectly	Very helpful	Fair	A Page	0.5		0.75		1		0.75
R_3JsKjfsT3VJJjRx	Student	M	TRUE	14	10-12	0	TRUE	TRUE	TRUE	TRUE	5	Misunderstood major points	Somewhat helpful	Somewhat fair	Multiple Pages	0.5		0.25		0.5		0.75
R_3JsKjfsT3VJJjRx	Student	M	TRUE	14	10-12	0	TRUE	TRUE	TRUE	TRUE	5	Perfectly	Very helpful	Fair	A Page	1		1		1		1
R_3JsKjfsT3VJJjRx	Student	M	TRUE	14	10-12	0	TRUE	TRUE	TRUE	TRUE	5	Missed some minor points	Somewhat helpful	Unfair	Multiple Pages	0.5		0.5		1	1
R_3JsKjfsT3VJJjRx	Student	M	TRUE	14	10-12	0	TRUE	TRUE	TRUE	TRUE	5	Missed some minor points	Somewhat helpful	Somewhat fair	Multiple Pages	0.75		0.75		1		0.75
R_3qesyB0GzcoHo4I	Assistant Professor	M	TRUE	49			TRUE
R_3oZcan0lt385rD4				55
R_2v7i6z8kUC22ku8	Student	M	FALSE	5	7-9	0	FALSE	FALSE			3
R_886jvohPMqDcNKF	Student	F	FALSE	40	4-6	0	FALSE	FALSE			3	Perfectly	Very helpful	Fair	A Page
R_3JqL1VK3E6Su7dE	Postdoctoral Researcher	M	FALSE	3	4-6	0	FALSE	FALSE			3	Perfectly	Not at all	Fair	1-2 Paragraphs
R_2sRVn8Ai9pRpeAi	Professor	M	FALSE	9
R_1KcA4jfMV4kD25E	Associate Professor	M	TRUE	50			TRUE
R_3kC9ftFbOwBqvEM	Assistant Professor	M	FALSE	7	>12	0	FALSE	TRUE	FALSE	FALSE	3
R_U9FyBJBYJiVEx6p	Student	M	FALSE	48	4-6	0	FALSE	TRUE	TRUE	TRUE	3	Perfectly	Not at all	Fair	1-2 Paragraphs	1	1	1	0.75	0.75	1	1
R_U9FyBJBYJiVEx6p	Student	M	FALSE	48	4-6	0	FALSE	TRUE	TRUE	TRUE	3	Perfectly	Very helpful	Fair	Half a Page	1	0.75	0.75	0.75	0.75	0.75	1
R_U9FyBJBYJiVEx6p	Student	M	FALSE	48	4-6	0	FALSE	TRUE	TRUE	TRUE	3	Perfectly	Very helpful	Fair	A Page	0	0.75	0.75	0.75	0.5	0.75	1
R_2dSKNqXg79iAvlS	Professor	M	FALSE	7	4-6	2	FALSE	TRUE	TRUE	TRUE	3	Missed some minor points	Very helpful	Fair	A Page	1	1	0.666667	1	1	1	1
R_2dSKNqXg79iAvlS	Professor	M	FALSE	7	4-6	2	FALSE	TRUE	TRUE	TRUE	3	Missed some minor points	Very helpful	Fair	A Page	0.666667	0.666667	0.666667	1	1	1	1
R_2dSKNqXg79iAvlS	Professor	M	FALSE	7	4-6	2	FALSE	TRUE	TRUE	TRUE	3	Missed some minor points	Very helpful	Fair	A Page	0.666667	1	0.666667	1	1	1	1
R_28YsAOfBPmspVm3	Student	M	FALSE	51	7-9	0	TRUE	FALSE			3	Missed some minor points	Very helpful	Fair	Half a Page	0.666667						0.333333
R_28YsAOfBPmspVm3	Student	M	FALSE	51	7-9	0	TRUE	FALSE			3	Perfectly	Very helpful	Fair	Half a Page	0.666667						0.666667
R_28YsAOfBPmspVm3	Student	M	FALSE	51	7-9	0	TRUE	FALSE			3	Missed some minor points	Very helpful	Fair	1-2 Paragraphs	1						0
R_2e4HbOsUDTwYCrl	Associate Professor	M	FALSE	7	10-12	0	FALSE	FALSE			4
R_BzgMYbFHFLgKICd	Student	M	TRUE	7	4-6	1	TRUE	FALSE			3	Perfectly	Somewhat helpful	Fair	1-2 Paragraphs	1						0.666667
R_BzgMYbFHFLgKICd	Student	M	TRUE	7	4-6	1	TRUE	FALSE			3	Perfectly	Somewhat helpful	Fair	1-2 Paragraphs	0.75						0.666667
R_BzgMYbFHFLgKICd	Student	M	TRUE	7	4-6	1	TRUE	FALSE			3	Missed some minor points	Somewhat helpful	Somewhat fair	1-2 Paragraphs	0.5						0.333333
R_2OUAgRpghHJ7Sqe	Student	F	TRUE	51	7-9	0	TRUE	FALSE			3	Missed some minor points	Somewhat helpful	Somewhat fair	1-2 Paragraphs
R_8AgpZmg6C1ZIOUV	Industry Researcher	M	TRUE	7	10-12	0	TRUE	TRUE	TRUE	FALSE	3
R_22Png0TtYsbTttU	Student	M	FALSE	46	10-12	1	TRUE	FALSE			3	Missed some minor points	Somewhat helpful	Somewhat fair	A Page
R_1eXW3paq7NbmKMl	Assistant Professor	M	FALSE	45	4-6	0	FALSE	TRUE	TRUE	TRUE	4	Perfectly	Very helpful	Fair	A Page	1	0.666667	1	0.666667	1	0.666667	1
R_1eXW3paq7NbmKMl	Assistant Professor	M	FALSE	45	4-6	0	FALSE	TRUE	TRUE	TRUE	4	Perfectly	Very helpful	Fair	A Page	0.666667	0.666667	0.666667	0.666667	0.666667	0.333333	0.333333
R_1eXW3paq7NbmKMl	Assistant Professor	M	FALSE	45	4-6	0	FALSE	TRUE	TRUE	TRUE	4	Perfectly	Very helpful	Fair	A Page	0.333333	0.333333	0.333333	0.333333	0.333333	0.333333	0.333333
R_1eXW3paq7NbmKMl	Assistant Professor	M	FALSE	45	4-6	0	FALSE	TRUE	TRUE	TRUE	4	Misunderstood major points	Not at all	Unfair	A Page	0	0	0	0	0	0	0
R_30pYAgYzD7YNufW	Professor	M	TRUE	36			TRUE
R_31zlcscn0RBpaWL	Assistant Professor	M	TRUE	55	7-9	1	TRUE	TRUE	TRUE	TRUE	4
R_3pum5caOe1u4LSK				18
R_2R3648m2GiQ0HDS	Postdoctoral Researcher	M	FALSE	54	10-12	0	TRUE	TRUE	TRUE	TRUE	5	Perfectly	Very helpful	Fair	Half a Page	1						0.666667
R_2R3648m2GiQ0HDS	Postdoctoral Researcher	M	FALSE	54	10-12	0	TRUE	TRUE	TRUE	TRUE	5	Perfectly	Somewhat helpful	Fair	Half a Page	1						0.666667
R_2R3648m2GiQ0HDS	Postdoctoral Researcher	M	FALSE	54	10-12	0	TRUE	TRUE	TRUE	TRUE	5	Perfectly	Somewhat helpful	Fair	Half a Page	0.75						1
R_2R3648m2GiQ0HDS	Postdoctoral Researcher	M	FALSE	54	10-12	0	TRUE	TRUE	TRUE	TRUE	5	Missed some minor points	Not at all	Fair	Half a Page	0.75						0.333333
R_2R3648m2GiQ0HDS	Postdoctoral Researcher	M	FALSE	54	10-12	0	TRUE	TRUE	TRUE	TRUE	5	Perfectly	Not at all	Fair	Half a Page	0.75						0.666667
R_aYmp3FnEM25BzAR	Postdoctoral Researcher	M	TRUE	35	>12	3	TRUE	TRUE	TRUE	FALSE	5	Probably didn't read it	Not at all	Fair	1-2 Paragraphs
R_2zTFKUs8ERA4Uco	Student	M	FALSE	13	4-6	0	FALSE	TRUE	TRUE	TRUE	4
R_OIKdhPn3yxBaeu5				35
R_2z7mBVcVyWPRoQo				53
R_2zjBuHdcE6j3IFU	Professor	M	TRUE	43	>12	1	TRUE	FALSE			6+
R_2zjBuHdcE6j3IFU	Professor	M	TRUE	49	>12	1	TRUE	FALSE			6+
R_2zjBuHdcE6j3IFU	Professor	M	TRUE	53	>12	0	TRUE	TRUE	TRUE	TRUE	4
R_2CHy0Fd9fOdJ0N1	Associate Professor		FALSE	45	10-12	0	TRUE	TRUE	TRUE	TRUE	2	Missed some minor points	Not at all	Fair	1-2 Paragraphs
R_1dgYwrq5H9cK3YP	Student	M	FALSE	56	7-9	0	TRUE	TRUE	TRUE	TRUE	4
R_3pgR3PCnxNiqgBx	Professor	M	TRUE	30	4-6	0	TRUE	FALSE			3
R_1ifKcakMg0xqsNB	Assistant Professor		TRUE	18			TRUE
R_1isqX8DyENoDvj1	Student	M	FALSE	26	7-9	0	FALSE	TRUE	TRUE	TRUE	6+	Missed some minor points	Somewhat helpful	Fair	A Page	0.5	0.666667	0.666667	0.666667	0.666667	0.666667	0.666667
R_1isqX8DyENoDvj1	Student	M	FALSE	26	7-9	0	FALSE	TRUE	TRUE	TRUE	6+	Perfectly	Somewhat helpful	Fair	A Page	0.5	0.666667	0.666667	1	0.666667	0.666667	0.333333
R_1isqX8DyENoDvj1	Student	M	FALSE	26	7-9	0	FALSE	TRUE	TRUE	TRUE	6+	Perfectly	Somewhat helpful	Fair	A Page	0.75	0.666667	0.666667	0.666667	0.666667	0.666667	0.333333
R_1isqX8DyENoDvj1	Student	M	FALSE	26	7-9	0	FALSE	TRUE	TRUE	TRUE	6+	Misunderstood major points	Not at all	Unfair	A Page	0.5	0.666667	0	0.666667	0.666667	0.666667	0.333333
R_1isqX8DyENoDvj1	Student	M	FALSE	26	7-9	0	FALSE	TRUE	TRUE	TRUE	6+	Missed some minor points	Somewhat helpful	Fair	A Page	0.5	0.666667	0.333333	1	1	0.666667	0.333333
R_1isqX8DyENoDvj1	Student	M	FALSE	26	7-9	0	FALSE	TRUE	TRUE	TRUE	6+	Perfectly	Somewhat helpful	Somewhat fair	A Page	0.25	0.333333	0.333333	0.666667	0.333333	0.333333	0.666667
R_3Pvmwnxv59RuxEb	Industry Researcher		FALSE	14	4-6	0	TRUE	TRUE	TRUE	TRUE	5
R_Zq57gNtlwNzWINj	Student	M	FALSE	46	4-6	0	TRUE	FALSE			5
R_3D17iTZPFWIcTmT	Student	M	FALSE	34	4-6	1	TRUE	TRUE	TRUE	TRUE	5	Misunderstood major points	Somewhat helpful	Somewhat fair	Half a Page
R_WunRinh8UbfaY93	Student	M	FALSE	26	10-12	0	TRUE	TRUE	TRUE	TRUE	6+
R_spaTceMNsb97ij7	Student	F	TRUE	21	7-9	0	TRUE	FALSE			5
R_3z9hvl2sWZRenWV	Industry Researcher	F	FALSE	39
R_tWcur07YdjzJL8d	Student	M	FALSE	53	10-12	0	FALSE	TRUE	TRUE	TRUE	4
R_3nOVIVMD8bH9az4	Student	M	TRUE	54	10-12	0	TRUE	FALSE			5
R_2cxztATx2LqDChz	Government Researcher	M	TRUE	30	4-6	0	TRUE	TRUE	TRUE	TRUE	4
R_1K8E4QmQ9CzxDsX	Assistant Professor	M	FALSE	7	>12	1	FALSE	TRUE	TRUE	FALSE	4
R_3elgz8bR5g43O4j	Student	M	FALSE	1	7-9	0	TRUE	FALSE			4	Missed some minor points	Not at all	Somewhat fair	1-2 Paragraphs	0.833333
R_3elgz8bR5g43O4j	Student	M	FALSE	1	7-9	0	TRUE	FALSE			4	Perfectly	Not at all	Fair	Half a Page	0.666667
R_3elgz8bR5g43O4j	Student	M	FALSE	1	7-9	0	TRUE	FALSE			4	Missed some minor points	Somewhat helpful	Unfair	Half a Page	0.333333
R_3elgz8bR5g43O4j	Student	M	FALSE	1	7-9	0	TRUE	FALSE			4	Missed some minor points	Very helpful	Unfair	A Page	1
R_1nZMxHrbHxXotHv	Industry Researcher		TRUE	53			TRUE
R_1N8llYrwSB9FBAS	Student	M	FALSE	49	4-6	0	FALSE	FALSE			6+
R_WBe7qqv0ewgJwfD	Assistant Professor	M	TRUE	34	10-12	0	TRUE	FALSE			3
R_20UlpoYeIQHspwS	Government Researcher	F	TRUE	30	10-12	0	TRUE	TRUE	TRUE	TRUE	3
R_1171ZWJA1adtyX9				52
R_3QLsDXSrUZHo85h				26
R_2wvJWF0YmmQEoce	Student	M	FALSE	14	>12	1	TRUE	TRUE	TRUE	TRUE	5
R_3p5puhn9GcaDtze	Student	F	TRUE	54	4-6	1	TRUE	FALSE			5
R_W2PEhcSgZBCL8rL				30
R_1jTCCCv6HuVyTQh	Associate Professor		FALSE	48
R_u3wu65BOynZgrBf	Associate Professor	F	FALSE	23	4-6	0	FALSE	FALSE			3	Missed some minor points	Very helpful	Fair	A Page
R_UuUIdLJXT8xH3P3	Student	M	FALSE	52	7-9	0	FALSE	TRUE	TRUE	TRUE	3	Perfectly	Somewhat helpful	Somewhat fair	1-2 Paragraphs	0.5	0.75	0.75	0.5	0.5	0.75	0.5
R_UuUIdLJXT8xH3P3	Student	M	FALSE	52	7-9	0	FALSE	TRUE	TRUE	TRUE	3	Perfectly	Very helpful	Fair	1-2 Paragraphs	0.75	0.5	0.75	0.75	0.75	0.5	0.5
R_UuUIdLJXT8xH3P3	Student	M	FALSE	52	7-9	0	FALSE	TRUE	TRUE	TRUE	3	Missed some minor points	Somewhat helpful	Somewhat fair	1-2 Paragraphs	0.5	0.5	0.5	0.5	0.75	0.5	0.5
R_3JrRBmhuXJIhQEk				9
R_2lCfVupUC7LqdyN	Industry Researcher		FALSE	49	4-6	0	FALSE	FALSE			6+
R_1OxynHulo3XPr6D	Assistant Professor	F	TRUE	21	7-9	0	TRUE	FALSE			5	Missed some minor points	Somewhat helpful	Somewhat fair	Multiple Pages	0.6						0.333333
R_1OxynHulo3XPr6D	Assistant Professor	F	TRUE	21	7-9	0	TRUE	FALSE			5	Perfectly	Somewhat helpful	Fair	A Page	0.8						0.333333
R_1OxynHulo3XPr6D	Assistant Professor	F	TRUE	21	7-9	0	TRUE	FALSE			5	Missed some minor points	Very helpful	Fair	Multiple Pages	0.6						0.666667
R_1OxynHulo3XPr6D	Assistant Professor	F	TRUE	21	7-9	0	TRUE	FALSE			5	Missed some minor points	Somewhat helpful		1-2 Paragraphs	0.6						0
R_1OxynHulo3XPr6D	Assistant Professor	F	TRUE	21	7-9	0	TRUE	FALSE			5	Perfectly	Not at all	Fair	Half a Page	1						1
R_vrH6kQL7WlPkdy1	Student	M	FALSE	34
R_3I3iMAcU3DTuRln	Student	M	FALSE	50	4-6	0	FALSE	TRUE	TRUE	TRUE	6+
R_2WZI2xVMUNxBNvo				11
R_1f8F1u5UqNeZYGS	Professor	M	FALSE	7
R_11dNbDhOpALIynU				31
R_294jnC1SYisbkRX				49
R_2aEMT9WoWGX5eg4	Student	M	FALSE	14
R_1E5syZTDJuQlqel	Professor	M	TRUE	51			TRUE
R_3k0LOBZjh6KEAFx	Industry Researcher	M	FALSE	34	>12	1	FALSE	TRUE	TRUE	TRUE	5
R_3QE5K9YDEy1i39A	Student	M	FALSE	7	>12	0	FALSE	FALSE			3	Perfectly	Somewhat helpful	Fair	A Page
R_24dVfGTt7anOtve	Student	M	FALSE	13	4-6	0	FALSE	TRUE	TRUE	TRUE	5	Missed some minor points	Somewhat helpful	Fair	Half a Page	1	1	1	1	1	1	1
R_24dVfGTt7anOtve	Student	M	FALSE	13	4-6	0	FALSE	TRUE	TRUE	TRUE	5	Missed some minor points	Somewhat helpful	Fair	Half a Page	1	1	1	1	1	1	1
R_24dVfGTt7anOtve	Student	M	FALSE	13	4-6	0	FALSE	TRUE	TRUE	TRUE	5	Perfectly	Somewhat helpful	Fair	A Page	1	1	1	1	1	1	1
R_24dVfGTt7anOtve	Student	M	FALSE	13	4-6	0	FALSE	TRUE	TRUE	TRUE	5	Missed some minor points	Very helpful	Fair	A Page	1	1	1	1	1	1	1
R_24dVfGTt7anOtve	Student	M	FALSE	13	4-6	0	FALSE	TRUE	TRUE	TRUE	5	Missed some minor points	Somewhat helpful	Fair	Half a Page	1	1	1	1	1	1	1
R_24dVfGTt7anOtve	Student	M	FALSE	13	1-3	0	FALSE	TRUE	TRUE	TRUE	3	Missed some minor points	Somewhat helpful	Fair	Half a Page	1	1	1	1	1	1	1
R_24dVfGTt7anOtve	Student	M	FALSE	13	1-3	0	FALSE	TRUE	TRUE	TRUE	3	Missed some minor points	Very helpful	Fair	Half a Page	1	1	1	1	1	1	1
R_24dVfGTt7anOtve	Student	M	FALSE	13	1-3	0	FALSE	TRUE	TRUE	TRUE	3	Missed some minor points	Somewhat helpful	Fair	Half a Page	1	1	1	1	1	1	1
R_11gueqkuacJyJXT	Student		FALSE	50	>12	1	FALSE	TRUE	TRUE	TRUE	4	Perfectly	Very helpful	Fair	Half a Page
R_2qeZ66r5y5Au4Op	Associate Professor	M	TRUE	49			TRUE
R_1CECLj6bL48jKhA	Industry Researcher	M	TRUE	34	>12	0	TRUE	TRUE	TRUE	TRUE	1	Missed some minor points	Very helpful	Fair	Multiple Pages	0.666667	0.666667	0.666667	0.666667	0.666667	0.666667	0.666667
R_1jeTaqpKLpsqtnk	Industry Researcher	M	TRUE	53	7-9	3	TRUE	TRUE	FALSE	TRUE	3	Perfectly	Very helpful	Fair	A Page	1	1	1	1	1	1	1
R_1jeTaqpKLpsqtnk	Industry Researcher	M	TRUE	53	7-9	3	TRUE	TRUE	FALSE	TRUE	3	Missed some minor points	Somewhat helpful	Fair	Half a Page	1	1	1	1	1	1	1
R_1jeTaqpKLpsqtnk	Industry Researcher	M	TRUE	53	7-9	3	TRUE	TRUE	FALSE	TRUE	3	Missed some minor points	Somewhat helpful	Fair	Half a Page	1	1	1	1	1	1	1
R_1etLI4FT7jD8d9E	Associate Professor	M	TRUE	31			TRUE
R_1LvulN30mQPWHTH	Student	M	FALSE	26	>12	2	TRUE	TRUE	TRUE	TRUE	6+				Multiple Pages
R_2w1wHFLgGB3Wxv1	Professor	M	FALSE	23
R_3D6fpgrKeqaptFw	Student	M	FALSE	34	>12	4	TRUE	TRUE	TRUE	TRUE	5				A Page
R_3Gva1I8CnFa6YrF	Assistant Professor	M	FALSE	47	7-9	1	FALSE	FALSE			3
R_1NglINPC2GymmDw	Student	M	FALSE	54
R_1hF2uP6PzwlGtg6	Student	M	TRUE	51	4-6	0	TRUE	FALSE			3	Perfectly	Very helpful	Fair	Half a Page	0.75						0.5
R_1hF2uP6PzwlGtg6	Student	M	TRUE	51	4-6	0	TRUE	FALSE			3	Missed some minor points	Very helpful	Fair	Half a Page	0.5						0.5
R_1hF2uP6PzwlGtg6	Student	M	TRUE	51	4-6	0	TRUE	FALSE			3	Missed some minor points	Very helpful	Fair	1-2 Paragraphs	0.25						0.5
R_2asrvgLKzohKT17	Assistant Professor	M	TRUE	34	4-6	0	TRUE	TRUE	TRUE	TRUE	4	Missed some minor points	Somewhat helpful	Fair	Half a Page
R_2aqquDEKP3Ol3qE	Assistant Professor	M	FALSE	7
R_1P7Shgkyiq737Ws	Student	M	TRUE	7	4-6	1	TRUE	TRUE	TRUE	TRUE	4
R_3HN32au3ZVAxl0b	Professor	M	FALSE	56	>12	2	FALSE	TRUE	TRUE	TRUE	3
R_10A88RGflZFrHgB	Student	M	TRUE	34	10-12	0	TRUE	FALSE			3	Perfectly	Very helpful	Fair	A Page
R_3iI0S3bHLCipKLA	Student	M	TRUE	6			TRUE
R_2TLeaUtDCPCT9lE	Assistant Professor	M	FALSE	34	>12	0	FALSE	TRUE	TRUE	TRUE	5
R_TjRqHuLsqQWU0Hn	Assistant Professor	M	TRUE	43	10-12	0	TRUE	FALSE			6+
R_3G331g68gEAMoJo				39
R_2rOQFuyhHCa4FaT	Student	M	FALSE	51	4-6	0	TRUE	TRUE	TRUE	TRUE	3	Missed some minor points	Somewhat helpful	Fair	A Page	0.25						0.666667
R_2rOQFuyhHCa4FaT	Student	M	FALSE	51	4-6	0	TRUE	TRUE	TRUE	TRUE	3	Perfectly	Very helpful	Fair	Multiple Pages	0.5						0.666667
R_2rOQFuyhHCa4FaT	Student	M	FALSE	51	4-6	0	TRUE	TRUE	TRUE	TRUE	3	Missed some minor points	Somewhat helpful	Fair	Half a Page	0.5						0.666667
R_wQPB6YJOe7mwHjr	Student	M	FALSE	1	>12	6	TRUE	FALSE			4
R_sFqWXgccxI2LVS1	Student	M	TRUE	3			TRUE
R_3lMjE9JlKCMjfDH				34
R_09C0HzvO7aeKscp	Student	M	FALSE	39	>12	4	FALSE	TRUE	TRUE	TRUE	5
R_1rj3IBW5xnmF3hc	Industry Researcher	M	FALSE	26	1-3	0	FALSE	TRUE	TRUE	TRUE	6+
R_3Ms2tOVa8BtgzLS	Associate Professor	M	TRUE	3	4-6	0	TRUE	FALSE			3	Perfectly	Somewhat helpful	Fair	A Page
R_u8uwORfL4U73OnL	Student	M	FALSE	53	10-12	0	FALSE	TRUE	TRUE	FALSE	3	Missed some minor points	Somewhat helpful	Fair	1-2 Paragraphs	0.5						0.333333
R_u8uwORfL4U73OnL	Student	M	FALSE	53	10-12	0	FALSE	TRUE	TRUE	FALSE	3	Missed some minor points	Very helpful	Fair	A Page	0.75						0.666667
R_u8uwORfL4U73OnL	Student	M	FALSE	53	10-12	0	FALSE	TRUE	TRUE	FALSE	3	Missed some minor points	Somewhat helpful	Fair	Half a Page	0.5						0.666667
R_0ulb2BEvjclsDU5	Student	M	FALSE	47
R_3EShNzkHz4OsWy2	Assistant Professor	M	FALSE	18
R_2aD0UkJpKRx3E8B	Student	M	FALSE	46	>12	3	FALSE	TRUE	FALSE	TRUE	3				1-2 Paragraphs
R_2aD0UkJpKRx3E8B	Student	M	FALSE	34	4-6	0	FALSE	TRUE	TRUE	TRUE	5
R_3szzgUFIAtbuoyf	Associate Professor	M	TRUE	49	10-12	0	TRUE	FALSE			6+	Missed some minor points	Somewhat helpful	Fair	Half a Page	1	0.75					1
R_3szzgUFIAtbuoyf	Associate Professor	M	TRUE	49	10-12	0	TRUE	FALSE			6+	Perfectly	Somewhat helpful	Fair	A Page	0.75	0.75					0.666667
R_3szzgUFIAtbuoyf	Associate Professor	M	TRUE	49	10-12	0	TRUE	FALSE			6+	Missed some minor points	Somewhat helpful	Fair	A Page	0.5	0.5					0.666667
R_3szzgUFIAtbuoyf	Associate Professor	M	TRUE	49	10-12	0	TRUE	FALSE			6+	Missed some minor points	Somewhat helpful	Fair	Half a Page	0.5	0.75					0.333333
R_3szzgUFIAtbuoyf	Associate Professor	M	TRUE	49	10-12	0	TRUE	FALSE			6+	Missed some minor points	Somewhat helpful	Fair	A Page	0.25	0.25					0.666667
R_3szzgUFIAtbuoyf	Associate Professor	M	TRUE	49	10-12	0	TRUE	FALSE			6+	Missed some minor points	Very helpful		Multiple Pages	0.5	0.5					0.333333
R_09eq9F7w3cidBEB	Assistant Professor	M	FALSE	30
R_8hRZL5mRAzk4OdP				56
R_2aR0MHi1uvei5vN	Professor	M	TRUE	1	4-6	0	TRUE	FALSE			4	Perfectly	Not at all	Fair	1-2 Paragraphs	0.833333	0.833333	0.833333	0.833333	0.833333	0.833333	0.833333
R_2aR0MHi1uvei5vN	Professor	M	TRUE	1	4-6	0	TRUE	FALSE			4	Perfectly	Somewhat helpful	Fair	Half a Page	0.666667	0.666667	0.666667	0.666667	0.666667	0.666667	0.666667
R_2aR0MHi1uvei5vN	Professor	M	TRUE	1	4-6	0	TRUE	FALSE			4	Perfectly	Very helpful	Fair	A Page	0.333333	0.333333	0.333333	0.333333	0.333333	0.333333	0.333333
R_2aR0MHi1uvei5vN	Professor	M	TRUE	1	4-6	0	TRUE	FALSE			4	Perfectly	Very helpful	Fair	A Page	1	1	1	1	1	1	1
R_1jCYBkXlT6O81VK	Industry Researcher	M	FALSE	53	4-6	0	FALSE	TRUE	TRUE	FALSE	3	Missed some minor points	Somewhat helpful	Somewhat fair	Half a Page
R_1ezO6KnFkTiQ7HK	Associate Professor	M	TRUE	38	4-6	2	TRUE	TRUE	TRUE	FALSE	5
R_1OpqLIaeZCi9Sae	Professor	M	FALSE	12	>12	0	FALSE	FALSE			6+	Missed some minor points	Somewhat helpful	Fair	Half a Page	0.75						0.666667
R_1OpqLIaeZCi9Sae	Professor	M	FALSE	12	>12	0	FALSE	FALSE			6+	Misunderstood major points	Somewhat helpful	Fair	Half a Page	0.75						1
R_1OpqLIaeZCi9Sae	Professor	M	FALSE	12	>12	0	FALSE	FALSE			6+	Perfectly	Somewhat helpful	Fair	Half a Page	0.5						1
R_1OpqLIaeZCi9Sae	Professor	M	FALSE	12	>12	0	FALSE	FALSE			6+	Perfectly	Somewhat helpful	Fair	Half a Page	0.5						0.666667
R_1OpqLIaeZCi9Sae	Professor	M	FALSE	12	>12	0	FALSE	FALSE			6+	Perfectly	Somewhat helpful	Fair	Half a Page	0.5						1
R_1OpqLIaeZCi9Sae	Professor	M	FALSE	12	>12	0	FALSE	FALSE			6+	Missed some minor points	Somewhat helpful	Fair	1-2 Paragraphs	0.5						0.666667
R_DIiKemJDHjwD5HX	Student	M	FALSE	31	10-12	0	TRUE	TRUE	TRUE	TRUE	5
R_1q95xIY1ceIcOW1	Student	M	FALSE	30	10-12	0	FALSE	TRUE	TRUE	TRUE	4
R_1GWkXIEN7qs4bm6	Student	M	FALSE	46	1-3	0	TRUE	TRUE	TRUE	TRUE	4	Perfectly	Very helpful	Fair	Half a Page	1	1	1	1	1	1	1
R_1GWkXIEN7qs4bm6	Student	M	FALSE	46	1-3	0	TRUE	TRUE	TRUE	TRUE	4	Perfectly	Very helpful	Fair	Half a Page	1	1	1	1	1	1	1
R_1GWkXIEN7qs4bm6	Student	M	FALSE	46	1-3	0	TRUE	TRUE	TRUE	TRUE	4	Perfectly	Very helpful	Fair	Half a Page	1	1	1	1	1	1	1
R_1GWkXIEN7qs4bm6	Student	M	FALSE	46	1-3	0	TRUE	TRUE	TRUE	TRUE	4	Perfectly	Very helpful	Fair	A Page	1	1	1	1	1	1	1
R_1GWkXIEN7qs4bm6	Student	M	FALSE	34	10-12	0	TRUE	TRUE	TRUE	TRUE	5
R_2q1Xcm1kXra5fI7	Associate Professor	M	FALSE	7	7-9	0	TRUE	TRUE	TRUE	TRUE	3
R_u8JOTZbSilKI7Zv	Student	M	FALSE	52	4-6	0	FALSE	TRUE	TRUE	TRUE	4	Misunderstood major points	Not at all	Unfair	A Page
R_sYAOwHGqoDzxc3L	Student	M	TRUE	7	7-9	2	TRUE	FALSE			3	Perfectly	Somewhat helpful	Fair	A Page	1						0.666667
R_sYAOwHGqoDzxc3L	Student	M	TRUE	7	7-9	2	TRUE	FALSE			3	Missed some minor points	Somewhat helpful	Somewhat fair	A Page	0.75						0.666667
R_sYAOwHGqoDzxc3L	Student	M	TRUE	7	7-9	2	TRUE	FALSE			3	Missed some minor points	Not at all	Unfair	1-2 Paragraphs	0.5						0.333333
R_1daT8dfxawhrxla	Industry Researcher	M	FALSE	53	10-12	0	FALSE	TRUE	TRUE	TRUE	2
R_1eLxrvnPkAgw7OE	Associate Professor	M	TRUE	7	10-12	1	TRUE	FALSE			3	Missed some minor points	Somewhat helpful	Somewhat fair	A Page	0.666667						0.666667
R_1eLxrvnPkAgw7OE	Associate Professor	M	TRUE	7	10-12	1	TRUE	FALSE			3	Perfectly	Somewhat helpful	Fair	A Page	0.666667						0.666667
R_1eLxrvnPkAgw7OE	Associate Professor	M	TRUE	7	10-12	1	TRUE	FALSE			3	Missed some minor points	Somewhat helpful	Fair	A Page	0.666667						0.666667
R_2VC8mJgKS4pxDBc	Student	M	TRUE	18	7-9	0	TRUE	FALSE			4
R_1o10WG0mZlTuG43	Professor	M	TRUE	39	10-12	1	TRUE	TRUE	TRUE	TRUE	4
R_2AEFYG8hQsOz7cH	Assistant Professor	M	FALSE	33
R_QnQ56xNorjGpTKF	Assistant Professor	M	TRUE	53	7-9	0	TRUE	TRUE	TRUE	TRUE	3	Missed some minor points	Somewhat helpful	Fair	Half a Page	0.75						0.666667
R_QnQ56xNorjGpTKF	Assistant Professor	M	TRUE	53	7-9	0	TRUE	TRUE	TRUE	TRUE	3	Missed some minor points	Somewhat helpful	Fair	A Page	1						1
R_QnQ56xNorjGpTKF	Assistant Professor	M	TRUE	53	7-9	0	TRUE	TRUE	TRUE	TRUE	3	Missed some minor points	Somewhat helpful	Fair	A Page	0.5						0.666667
R_QnQ56xNorjGpTKF	Assistant Professor	M	TRUE	53	>12	1	TRUE	TRUE	TRUE	TRUE	4	Missed some minor points	Somewhat helpful	Fair	A Page	0.5						0.666667
R_QnQ56xNorjGpTKF	Assistant Professor	M	TRUE	53	>12	1	TRUE	TRUE	TRUE	TRUE	4	Missed some minor points	Somewhat helpful	Fair	A Page	0.5						0.666667
R_QnQ56xNorjGpTKF	Assistant Professor	M	TRUE	53	>12	1	TRUE	TRUE	TRUE	TRUE	4	Missed some minor points	Somewhat helpful	Fair	A Page	0.5						0.666667
R_QnQ56xNorjGpTKF	Assistant Professor	M	TRUE	53	>12	1	TRUE	TRUE	TRUE	TRUE	4	Missed some minor points	Very helpful	Fair	Multiple Pages	0.5						0.666667
R_WB4ea4U9jo0Vcbf	Student	M	FALSE	46	4-6	1	FALSE	TRUE	TRUE	TRUE	5
R_3GrIIICKgJmaYPG	Professor	M	TRUE	20	7-9	0	TRUE	TRUE	TRUE	TRUE	4
R_1MSWghneVkuFeg1	Industry Researcher	M	FALSE	40	10-12	1	FALSE	FALSE			4
R_2Pthk2olF0IgO2Z				10
R_1DRSYzHS5kHasJA	Student	M	FALSE	21	4-6	1	TRUE	TRUE	TRUE	TRUE	5	Perfectly	Somewhat helpful	Fair	A Page	0.8						0.333333
R_1DRSYzHS5kHasJA	Student	M	FALSE	21	4-6	1	TRUE	TRUE	TRUE	TRUE	5	Missed some minor points	Somewhat helpful	Fair	A Page	0.8						0.666667
R_1DRSYzHS5kHasJA	Student	M	FALSE	21	4-6	1	TRUE	TRUE	TRUE	TRUE	5	Missed some minor points	Somewhat helpful	Somewhat fair	A Page	0.6						0.333333
R_1DRSYzHS5kHasJA	Student	M	FALSE	21	4-6	1	TRUE	TRUE	TRUE	TRUE	5	Misunderstood major points	Very helpful	Somewhat fair	Multiple Pages	0.4						0.333333
R_1DRSYzHS5kHasJA	Student	M	FALSE	21	4-6	1	TRUE	TRUE	TRUE	TRUE	5	Missed some minor points	Not at all	Somewhat fair	1-2 Paragraphs	0.6						0.333333
R_1DRSYzHS5kHasJA	Student	M	FALSE	21	1-3	0	TRUE	TRUE	TRUE	TRUE	4	Perfectly	Not at all		A Page	0.8						0.333333
R_1DRSYzHS5kHasJA	Student	M	FALSE	21	1-3	0	TRUE	TRUE	TRUE	TRUE	4	Missed some minor points	Somewhat helpful	Somewhat fair	A Page	0.6						0.333333
R_1DRSYzHS5kHasJA	Student	M	FALSE	21	1-3	0	TRUE	TRUE	TRUE	TRUE	4	Perfectly	Not at all	Fair	A Page	0.8						0.333333
R_1DRSYzHS5kHasJA	Student	M	FALSE	21	1-3	0	TRUE	TRUE	TRUE	TRUE	4	Perfectly	Somewhat helpful	Somewhat fair	Multiple Pages	0.8						0.333333
R_1DRSYzHS5kHasJA	Student	M	FALSE	53	>12	1	FALSE	TRUE	TRUE	TRUE	4	Misunderstood major points	Somewhat helpful	Somewhat fair	A Page	0.4						1
R_1DRSYzHS5kHasJA	Student	M	FALSE	53	>12	1	FALSE	TRUE	TRUE	TRUE	4	Perfectly	Very helpful	Fair	A Page	0.6						1
R_1DRSYzHS5kHasJA	Student	M	FALSE	53	>12	1	FALSE	TRUE	TRUE	TRUE	4	Perfectly	Somewhat helpful	Fair	A Page	0.6						0.333333
R_1DRSYzHS5kHasJA	Student	M	FALSE	53	>12	1	FALSE	TRUE	TRUE	TRUE	4	Perfectly	Somewhat helpful	Fair	A Page	0.8						0.666667
R_2dZnK63jt4IeLgr	Student	M	FALSE	12
R_1Hc84JoBnQTbf3e	Assistant Professor	M	TRUE	1	4-6	1	TRUE	TRUE	TRUE	TRUE	4	Perfectly	Very helpful	Fair	Multiple Pages
R_3NIlZnrJZAB09QB	Student	M	FALSE	49
R_1JCJiL7uewnEdpY	Student	F	FALSE	49	10-12	4	TRUE	FALSE			6+
R_3g72ZStgIOLjDTN	Professor	M	FALSE	27	4-6	0	FALSE	FALSE			6+	Perfectly	Somewhat helpful	Fair	Half a Page	0.5
R_3g72ZStgIOLjDTN	Professor	M	FALSE	27	4-6	0	FALSE	FALSE			6+	Perfectly	Somewhat helpful	Fair	Half a Page	0.5
R_3g72ZStgIOLjDTN	Professor	M	FALSE	27	4-6	0	FALSE	FALSE			6+	Perfectly	Not at all	Fair	Half a Page	0.75
R_3g72ZStgIOLjDTN	Professor	M	FALSE	27	4-6	0	FALSE	FALSE			6+	Perfectly	Somewhat helpful	Fair	A Page	1
R_3g72ZStgIOLjDTN	Professor	M	FALSE	27	4-6	0	FALSE	FALSE			6+	Perfectly	Somewhat helpful	Somewhat fair	A Page	0.75
R_3g72ZStgIOLjDTN	Professor	M	FALSE	27	4-6	0	FALSE	FALSE			6+	Perfectly	Very helpful	Fair	A Page	0.75
R_3g72ZStgIOLjDTN	Professor	M	FALSE	27	4-6	0	FALSE	FALSE			6+
R_1kNXlv8iTlBgDAk	Industry Researcher	F	TRUE	37	10-12	0	TRUE	FALSE			4
R_BJ5deM1XHOcCGSl				7
R_6LlmDqGnblS1nJD	Student	M	FALSE	39	7-9	1	FALSE	TRUE	TRUE	TRUE	4
R_2uWCXxW0uW9vb7u	Government Researcher		TRUE	39	7-9	1	TRUE	FALSE			5	Perfectly	Somewhat helpful	Fair	Half a Page	0.75	0.75	0.5	0.75	0.75	1	0.5
R_2uWCXxW0uW9vb7u	Government Researcher		TRUE	39	7-9	1	TRUE	FALSE			5	Misunderstood major points	Not at all	Somewhat fair	1-2 Paragraphs	1	0.75	1	0.75	0.5	1	0.75
R_2uWCXxW0uW9vb7u	Government Researcher		TRUE	39	7-9	1	TRUE	FALSE			5	Missed some minor points	Somewhat helpful	Somewhat fair	Half a Page	0.5	0.75	0.75	0.5	0.75	0.75	0.75
R_2uWCXxW0uW9vb7u	Government Researcher		TRUE	39	7-9	1	TRUE	FALSE			5	Missed some minor points	Somewhat helpful	Fair	A Page	0	0	0.5	0.25	0.5	0.75	0.75
R_2uWCXxW0uW9vb7u	Government Researcher		TRUE	39	7-9	1	TRUE	FALSE			5	Missed some minor points	Somewhat helpful	Fair	Half a Page	0.5	0.5	0.75	0.5	0.5	0.75	0.5
R_2uWCXxW0uW9vb7u	Government Researcher		TRUE	30	7-9	1	TRUE	TRUE	TRUE	TRUE	5	Missed some minor points	Very helpful	Fair	Multiple Pages
R_2sU6JTjQDUGMvr6	Postdoctoral Researcher		TRUE	55	7-9	1	TRUE	TRUE	TRUE	TRUE	4
R_27ViHmAzc6mjwYP	Professor	M	TRUE	39	>12	2	TRUE	FALSE			5	Missed some minor points	Somewhat helpful	Fair	A Page
R_27ViHmAzc6mjwYP	Professor	M	TRUE	36	>12	0	TRUE	TRUE	TRUE	TRUE	5	Misunderstood major points	Not at all	Somewhat fair	Multiple Pages
R_2B5737hGFjRfrlu	Student	M	TRUE	34	4-6	0	TRUE	FALSE			2
R_3D62d6SaACPtPkQ	Assistant Professor	F	FALSE	54	7-9	0	FALSE	FALSE			6+
R_2woB7oFLcQuiHhk	Assistant Professor	M	TRUE	21			TRUE
R_tLmJ36rmeSdLRyV	Industry Researcher	M	FALSE	53
R_2wcSnKZfJDq1wnw	Student	M	FALSE	34	1-3	0	TRUE	FALSE			4				1-2 Paragraphs
R_1eytgrsD3Za8ctX	Student	M	FALSE	7	4-6	1	FALSE	TRUE	TRUE	TRUE	3
R_26vBGoRSF6SZHMt	Student	M	TRUE	46	4-6	1	TRUE	FALSE			3	Missed some minor points	Somewhat helpful	Fair	Half a Page
R_SVMAzvX9LsYQAVz	Industry Researcher	M	TRUE	55			TRUE
R_XpGcwixA4hPPLd7	Professor	M	TRUE	54	>12	2	TRUE	FALSE			5	Missed some minor points	Very helpful	Fair	Multiple Pages	0.75						1
R_XpGcwixA4hPPLd7	Professor	M	TRUE	54	>12	2	TRUE	FALSE			5	Missed some minor points	Very helpful	Fair	A Page	0.75						0.333333
R_XpGcwixA4hPPLd7	Professor	M	TRUE	54	>12	2	TRUE	FALSE			5	Missed some minor points	Somewhat helpful	Fair	A Page	0.25						0.666667
R_XpGcwixA4hPPLd7	Professor	M	TRUE	54	>12	2	TRUE	FALSE			5	Missed some minor points	Very helpful	Fair	A Page	0.75						0.666667
R_XpGcwixA4hPPLd7	Professor	M	TRUE	54	>12	2	TRUE	FALSE			5	Missed some minor points	Very helpful	Fair	A Page	0.5						0.333333
R_O848tMdBFsz7AiZ	Student	M	FALSE	14	10-12	1	TRUE	TRUE	TRUE	TRUE	5	Missed some minor points	Not at all	Unfair	1-2 Paragraphs
R_O848tMdBFsz7AiZ	Student	M	FALSE	34	10-12	0	TRUE	TRUE	TRUE	TRUE	5	Perfectly	Very helpful	Fair	A Page
R_ROIcRzp59nZ5oad	Industry Researcher	M	FALSE	7	4-6	0	FALSE	TRUE	TRUE	TRUE	5
R_3QW3uMciq6JdwN3	Student	M	TRUE	43	>12	0	TRUE	FALSE			6+	Perfectly			A Page	1						0.5
R_3QW3uMciq6JdwN3	Student	M	TRUE	43	>12	0	TRUE	FALSE			6+	Missed some minor points	Somewhat helpful	Fair	Half a Page	0.25						0.5
R_3QW3uMciq6JdwN3	Student	M	TRUE	43	>12	0	TRUE	FALSE			6+	Misunderstood major points	Not at all	Somewhat fair	1-2 Paragraphs	0.25						0.5
R_3QW3uMciq6JdwN3	Student	M	TRUE	43	>12	0	TRUE	FALSE			6+	Missed some minor points	Not at all	Somewhat fair	1-2 Paragraphs	0.5						1
R_3QW3uMciq6JdwN3	Student	M	TRUE	43	>12	0	TRUE	FALSE			6+	Perfectly	Somewhat helpful	Fair	1-2 Paragraphs	0.5						0.5
R_3QW3uMciq6JdwN3	Student	M	TRUE	43	>12	0	TRUE	FALSE			6+	Perfectly	Very helpful	Fair	Half a Page	0.75						1
R_3QW3uMciq6JdwN3	Student	M	TRUE	21	7-9	0	TRUE	FALSE			5	Perfectly	Very helpful	Fair	Multiple Pages	0.5						0.666667
R_3QW3uMciq6JdwN3	Student	M	TRUE	21	7-9	0	TRUE	FALSE			5	Perfectly	Very helpful	Fair	Multiple Pages	1						1
R_3QW3uMciq6JdwN3	Student	M	TRUE	21	7-9	0	TRUE	FALSE			5	Missed some minor points	Somewhat helpful	Fair	A Page	1						0.666667
R_3QW3uMciq6JdwN3	Student	M	TRUE	21	7-9	0	TRUE	FALSE			5	Missed some minor points	Very helpful	Fair	A Page	1						0.666667
R_3QW3uMciq6JdwN3	Student	M	TRUE	21	7-9	0	TRUE	FALSE			5	Perfectly	Very helpful	Fair	A Page	0.25						1
R_3QW3uMciq6JdwN3	Student	M	TRUE	53	10-12	1	TRUE	TRUE	TRUE	TRUE	4	Missed some minor points	Somewhat helpful	Somewhat fair	A Page	0.333333						1
R_3QW3uMciq6JdwN3	Student	M	TRUE	53	10-12	1	TRUE	TRUE	TRUE	TRUE	4	Missed some minor points	Very helpful	Fair	A Page	0.666667						0.5
R_3QW3uMciq6JdwN3	Student	M	TRUE	53	10-12	1	TRUE	TRUE	TRUE	TRUE	4	Misunderstood major points	Not at all	Somewhat fair	1-2 Paragraphs	0.666667						0
R_3QW3uMciq6JdwN3	Student	M	TRUE	53	10-12	1	TRUE	TRUE	TRUE	TRUE	4	Missed some minor points	Somewhat helpful	Fair	Half a Page	1						0.5
R_UXPCK2pbZELDOpj	Assistant Professor	M	FALSE	7	1-3	1	FALSE	FALSE			3	Missed some minor points	Somewhat helpful	Somewhat fair	Half a Page	0.75						0.666667
R_UXPCK2pbZELDOpj	Assistant Professor	M	FALSE	7	1-3	1	FALSE	FALSE			3	Missed some minor points	Very helpful	Fair	Half a Page	1						0.666667
R_UXPCK2pbZELDOpj	Assistant Professor	M	FALSE	7	1-3	1	FALSE	FALSE			3	Missed some minor points	Somewhat helpful	Fair	Half a Page	0.75						0.666667
R_UXPCK2pbZELDOpj	Assistant Professor	M	FALSE	7	1-3	1	FALSE	FALSE			3					0.75						0.666667
R_UXPCK2pbZELDOpj	Assistant Professor	M	FALSE	7	1-3	1	FALSE	FALSE			3					0.75						0.666667
R_UXPCK2pbZELDOpj	Assistant Professor	M	FALSE	6	1-3	0	TRUE	TRUE	TRUE	TRUE	6+	Missed some minor points	Very helpful	Fair	Half a Page	0.75						0.666667
R_UXPCK2pbZELDOpj	Assistant Professor	M	FALSE	6	1-3	0	TRUE	TRUE	TRUE	TRUE	6+	Missed some minor points	Very helpful	Fair	Half a Page	0.5						0.666667
R_UXPCK2pbZELDOpj	Assistant Professor	M	FALSE	6	1-3	0	TRUE	TRUE	TRUE	TRUE	6+	Missed some minor points	Very helpful	Fair	Half a Page	0.75						0.333333
R_UXPCK2pbZELDOpj	Assistant Professor	M	FALSE	6	1-3	0	TRUE	TRUE	TRUE	TRUE	6+	Missed some minor points	Very helpful	Fair	Half a Page	0.75						0.666667
R_UXPCK2pbZELDOpj	Assistant Professor	M	FALSE	6	1-3	0	TRUE	TRUE	TRUE	TRUE	6+	Missed some minor points	Somewhat helpful	Fair	Half a Page	0.5						0.666667
R_UXPCK2pbZELDOpj	Assistant Professor	M	FALSE	6	1-3	0	TRUE	TRUE	TRUE	TRUE	6+	Missed some minor points	Somewhat helpful	Fair	Half a Page	0.5						0.333333
R_UXPCK2pbZELDOpj	Assistant Professor	M	FALSE	35	>12	4	TRUE	TRUE	TRUE	TRUE	6+	Missed some minor points	Somewhat helpful	Fair	Half a Page
R_2YxGlbxCThP8mrw	Student	M	FALSE	43
R_2TXFVJWrPAXFTg0	Government Researcher	M	TRUE	30			TRUE
R_C35tFHKeCLeT4zf	Associate Professor	M	TRUE	26	7-9	0	TRUE	TRUE	TRUE	TRUE	6+	Missed some minor points	Somewhat helpful	Fair	A Page	0.5	1	1	0.666667	0.666667		0.666667
R_C35tFHKeCLeT4zf	Associate Professor	M	TRUE	26	7-9	0	TRUE	TRUE	TRUE	TRUE	6+	Missed some minor points	Very helpful	Fair	Multiple Pages	0.5	0.333333	0.666667	1	0.666667		0.666667
R_C35tFHKeCLeT4zf	Associate Professor	M	TRUE	26	7-9	0	TRUE	TRUE	TRUE	TRUE	6+	Perfectly	Very helpful	Fair	A Page	0.5	0.666667	0.666667	0.666667	0.666667		0.666667
R_C35tFHKeCLeT4zf	Associate Professor	M	TRUE	26	7-9	0	TRUE	TRUE	TRUE	TRUE	6+	Missed some minor points	Very helpful	Fair	Multiple Pages	0.75	1	1	0.333333	0.666667		0.333333
R_C35tFHKeCLeT4zf	Associate Professor	M	TRUE	26	7-9	0	TRUE	TRUE	TRUE	TRUE	6+				A Page	0.5	0.666667	0.666667	0.666667	0.666667		0.666667
R_C35tFHKeCLeT4zf	Associate Professor	M	TRUE	26	7-9	0	TRUE	TRUE	TRUE	TRUE	6+	Missed some minor points	Very helpful	Fair	A Page	0.5	1	1	0.666667	0.333333		0.666667
R_2fwX5dvEwnUF7oA	Associate Professor	M	TRUE	38	10-12	0	TRUE	FALSE			5	Perfectly	Somewhat helpful	Fair	Half a Page	1		1		0.666667		1
R_2fwX5dvEwnUF7oA	Associate Professor	M	TRUE	38	10-12	0	TRUE	FALSE			5	Perfectly	Somewhat helpful	Fair	Half a Page	0.75		1		0.333333		0.333333
R_2fwX5dvEwnUF7oA	Associate Professor	M	TRUE	38	10-12	0	TRUE	FALSE			5	Perfectly	Very helpful	Fair	A Page	0.5		0.666667		0.666667		0.333333
R_2fwX5dvEwnUF7oA	Associate Professor	M	TRUE	38	10-12	0	TRUE	FALSE			5	Perfectly	Somewhat helpful	Fair	A Page	0.5		1		0.333333		0.666667
R_2fwX5dvEwnUF7oA	Associate Professor	M	TRUE	38	10-12	0	TRUE	FALSE			5	Perfectly	Very helpful	Fair	Multiple Pages	0.75		1		0.666667		0.666667
R_2fwX5dvEwnUF7oA	Associate Professor	M	TRUE	8	4-6	0	TRUE	FALSE			4	Missed some minor points	Somewhat helpful	Fair	Half a Page	1						0.333333
R_2fwX5dvEwnUF7oA	Associate Professor	M	TRUE	8	4-6	0	TRUE	FALSE			4	Missed some minor points	Somewhat helpful	Fair	A Page	0.666667						0.333333
R_2fwX5dvEwnUF7oA	Associate Professor	M	TRUE	8	4-6	0	TRUE	FALSE			4	Perfectly	Very helpful	Fair	A Page	0.666667						0.333333
R_2fwX5dvEwnUF7oA	Associate Professor	M	TRUE	8	4-6	0	TRUE	FALSE			4	Missed some minor points	Somewhat helpful	Fair	Half a Page	1						0.666667
R_2tyVvUe4fC6Tqjp	Other	M	TRUE	2	>12	2	TRUE	TRUE	TRUE	TRUE	5	Missed some minor points	Very helpful	Fair	A Page	0.75	0.75	0.75		0.666667		0.5
R_2tyVvUe4fC6Tqjp	Other	M	TRUE	2	>12	2	TRUE	TRUE	TRUE	TRUE	5	Missed some minor points	Somewhat helpful	Fair	A Page	0.75	0.5	0.75		0.333333		0.5
R_2tyVvUe4fC6Tqjp	Other	M	TRUE	2	>12	2	TRUE	TRUE	TRUE	TRUE	5	Misunderstood major points	Not at all	Unfair	Half a Page	0.25	0.75	0.5		0		0.75
R_2tyVvUe4fC6Tqjp	Other	M	TRUE	2	>12	2	TRUE	TRUE	TRUE	TRUE	5	Perfectly	Somewhat helpful	Fair	Half a Page	0.75	0.75	0.75		0.666667		0.25
R_2tyVvUe4fC6Tqjp	Other	M	TRUE	2	>12	2	TRUE	TRUE	TRUE	TRUE	5	Perfectly	Not at all	Fair	Half a Page	0.75	0.75	0.75		0.666667		0
R_2tyVvUe4fC6Tqjp	Other	M	TRUE	20	>12	0	TRUE	TRUE	TRUE	TRUE	5	Misunderstood major points	Somewhat helpful	Somewhat fair	A Page	0.5
R_2tyVvUe4fC6Tqjp	Other	M	TRUE	20	>12	0	TRUE	TRUE	TRUE	TRUE	5	Missed some minor points	Not at all	Fair	1-2 Paragraphs	0.75
R_2tyVvUe4fC6Tqjp	Other	M	TRUE	20	>12	0	TRUE	TRUE	TRUE	TRUE	5	Perfectly	Very helpful	Fair	Multiple Pages	0.5
R_2tyVvUe4fC6Tqjp	Other	M	TRUE	20	>12	0	TRUE	TRUE	TRUE	TRUE	5	Missed some minor points	Somewhat helpful	Fair	Multiple Pages	0.5
R_2tyVvUe4fC6Tqjp	Other	M	TRUE	20	>12	0	TRUE	TRUE	TRUE	TRUE	5	Misunderstood major points	Not at all	Somewhat fair	Half a Page	0.5
R_2tyVvUe4fC6Tqjp	Other	M	TRUE	20	10-12	1	TRUE	TRUE	TRUE	TRUE	6+	Perfectly	Somewhat helpful	Fair	A Page	1
R_2tyVvUe4fC6Tqjp	Other	M	TRUE	20	10-12	1	TRUE	TRUE	TRUE	TRUE	6+	Missed some minor points	Somewhat helpful	Somewhat fair	Multiple Pages	0.5
R_2tyVvUe4fC6Tqjp	Other	M	TRUE	20	10-12	1	TRUE	TRUE	TRUE	TRUE	6+	Missed some minor points	Somewhat helpful	Fair	A Page	0.5
R_2tyVvUe4fC6Tqjp	Other	M	TRUE	20	10-12	1	TRUE	TRUE	TRUE	TRUE	6+	Misunderstood major points	Very helpful	Somewhat fair	Multiple Pages	0.25
R_2tyVvUe4fC6Tqjp	Other	M	TRUE	20	10-12	1	TRUE	TRUE	TRUE	TRUE	6+	Perfectly	Somewhat helpful	Fair	1-2 Paragraphs	0.75
R_2tyVvUe4fC6Tqjp	Other	M	TRUE	20	10-12	1	TRUE	TRUE	TRUE	TRUE	6+	Perfectly	Very helpful	Fair	Half a Page	1
R_d5SuWOOvrck7d1D	Industry Researcher	M	FALSE	40
R_oYTq3PJCJUlgyEp	Professor	M	FALSE	4	4-6	0	TRUE	FALSE			3	Perfectly	Somewhat helpful	Fair	Multiple Pages
R_2vesY4zbpxVHA9J	Professor	M	FALSE	2	10-12	0	FALSE	TRUE	TRUE	FALSE	5
R_2xOUHQQoVrtKNdK	Student	M	FALSE	20	4-6	0	TRUE	TRUE	FALSE	TRUE	4
R_6gk84anOXeHTAMV	Government Researcher	M	FALSE	39	>12	0	TRUE	TRUE	TRUE	TRUE	5	Perfectly	Very helpful	Fair	A Page
R_2b11TXy6yTa6bxK	Government Researcher	M	FALSE	39	10-12	0	FALSE	FALSE			4	Missed some minor points	Somewhat helpful		Multiple Pages
R_2b11TXy6yTa6bxK	Government Researcher	M	FALSE	23	>12	0	FALSE	FALSE			3	Perfectly	Very helpful	Somewhat fair	A Page
R_1CfmteruRk28Tq3	Student	F	TRUE	7			TRUE
R_22x1ljHqLy8QmYg				40
R_VJxCZjJTfJtqTbX	Student	M	FALSE	16	1-3	0	FALSE	TRUE	TRUE	TRUE	3	Perfectly	Somewhat helpful	Fair	Half a Page	0.75						0.5
R_VJxCZjJTfJtqTbX	Student	M	FALSE	16	1-3	0	FALSE	TRUE	TRUE	TRUE	3	Perfectly	Very helpful	Fair	A Page	0.75						0
R_VJxCZjJTfJtqTbX	Student	M	FALSE	16	1-3	0	FALSE	TRUE	TRUE	TRUE	3	Missed some minor points	Somewhat helpful	Fair	A Page	0.75						0.5
R_2f7pk8bG1TLWffQ	Student	M	FALSE	40
R_OBAFzSM0ssDbVst	Professor		TRUE	19	4-6	1	TRUE	TRUE	TRUE	TRUE	4	Missed some minor points	Somewhat helpful	Fair	A Page
R_1isVjT2Qk0CxNfK	Student	M	FALSE	53	4-6	0	FALSE	TRUE	TRUE	TRUE	3	Perfectly	Very helpful	Fair	A Page	0.75						0.666667
R_1isVjT2Qk0CxNfK	Student	M	FALSE	53	4-6	0	FALSE	TRUE	TRUE	TRUE	3	Missed some minor points	Somewhat helpful	Fair	Half a Page	0.5						0
R_1isVjT2Qk0CxNfK	Student	M	FALSE	53	4-6	0	FALSE	TRUE	TRUE	TRUE	3	Missed some minor points	Somewhat helpful	Fair	1-2 Paragraphs	0.5						0
R_3adCpRJPDql7Xm9	Professor	M	FALSE	15
R_2R4Uib227siJih	Assistant Professor	M	FALSE	3	1-3	0	FALSE	FALSE			3
R_2YlFM2GndOebL0E	Industry Researcher	M	FALSE	53	4-6	1	FALSE	TRUE	TRUE	TRUE	3	Missed some minor points	Very helpful	Fair	A Page
R_3J3siXOjgZjsO9O	Industry Researcher	M	TRUE	43			TRUE
R_3qHH2K1rQ7Gr1Q1	Professor	M	TRUE	38	7-9	0	TRUE	FALSE			5
R_RmZIHTjM0b0vudr				35
R_2tLJRk4yIjuYkGH	Professor	M	FALSE	53	10-12	0	FALSE	TRUE	TRUE	FALSE	5
R_28TYzP0Tvjov6m8	Professor	M	FALSE	40	7-9	1	FALSE	FALSE			3	Perfectly	Somewhat helpful	Fair	Half a Page	0.75	0.75	0.75		0.75	1	0.5
R_28TYzP0Tvjov6m8	Professor	M	FALSE	40	7-9	1	FALSE	FALSE			3	Misunderstood major points	Somewhat helpful	Somewhat fair	Half a Page	0.75	0.75	0.75		0.75	1	0
R_28TYzP0Tvjov6m8	Professor	M	FALSE	40	7-9	1	FALSE	FALSE			3	Missed some minor points	Somewhat helpful	Somewhat fair	Half a Page	0.75	0.75	1		0.75	1	0.5
R_28TYzP0Tvjov6m8	Professor	M	FALSE	40	7-9	1	FALSE	FALSE			3					1	1	1		0.5	1	1
R_3IQQT4l51fGX4oP	Assistant Professor	M	FALSE	38
R_0Js4J4xtiVyE6at	Industry Researcher	M	TRUE	34	1-3	1	TRUE	TRUE	TRUE	TRUE	2	Missed some minor points	Somewhat helpful	Fair	1-2 Paragraphs
R_1jfxl2JBPENTsl8	Student	F	TRUE	27	>12	2	TRUE	FALSE			5	Perfectly	Somewhat helpful	Fair	A Page	0.25
R_1jfxl2JBPENTsl8	Student	F	TRUE	27	>12	2	TRUE	FALSE			5	Perfectly	Not at all	Fair	A Page	0.5
R_1jfxl2JBPENTsl8	Student	F	TRUE	27	>12	2	TRUE	FALSE			5	Perfectly	Not at all	Fair	Half a Page	0.5
R_1jfxl2JBPENTsl8	Student	F	TRUE	27	>12	2	TRUE	FALSE			5	Missed some minor points	Very helpful	Fair	A Page	0.5
R_1jfxl2JBPENTsl8	Student	F	TRUE	27	>12	2	TRUE	FALSE			5	Missed some minor points	Somewhat helpful	Fair	A Page	0.5
R_2uEbHsqsTIQNxuR	Assistant Professor	M	TRUE	2	>12	2	TRUE	TRUE	TRUE	TRUE	5
R_1MRnyPkiMyH6M0C	Student		TRUE	21			TRUE
R_2CwC9Hgi1U1PSbT	Student		FALSE	23	7-9	0	FALSE	FALSE			5	Missed some minor points	Somewhat helpful	Fair	A Page
R_1MVW0PtGQ6x2XbT	Postdoctoral Researcher	M	FALSE	51	4-6	0	TRUE	FALSE			3	Perfectly	Somewhat helpful	Fair	Half a Page	0.5						0.666667
R_1MVW0PtGQ6x2XbT	Postdoctoral Researcher	M	FALSE	51	4-6	0	TRUE	FALSE			3	Missed some minor points	Somewhat helpful	Somewhat fair	Half a Page	0						0.333333
R_1MVW0PtGQ6x2XbT	Postdoctoral Researcher	M	FALSE	51	4-6	0	TRUE	FALSE			3	Misunderstood major points	Somewhat helpful	Somewhat fair	1-2 Paragraphs	0.75						0.333333
R_1MVW0PtGQ6x2XbT	Postdoctoral Researcher	M	FALSE	16	10-12	2	TRUE	FALSE			4	Missed some minor points	Not at all	Somewhat fair	1-2 Paragraphs	0.75						0.333333
R_1MVW0PtGQ6x2XbT	Postdoctoral Researcher	M	FALSE	16	10-12	2	TRUE	FALSE			4	Misunderstood major points	Somewhat helpful	Somewhat fair	Half a Page	0.5						0.333333
R_1MVW0PtGQ6x2XbT	Postdoctoral Researcher	M	FALSE	16	10-12	2	TRUE	FALSE			4	Missed some minor points	Not at all	Somewhat fair	Half a Page	0.5						0.666667
R_1MVW0PtGQ6x2XbT	Postdoctoral Researcher	M	FALSE	16	10-12	2	TRUE	FALSE			4	Probably didn't read it	Not at all	Somewhat fair	1-2 Paragraphs	0.5						0
R_333d7dCf0NXr5hU	Assistant Professor	M	TRUE	10	>12	1	TRUE	TRUE	TRUE	TRUE	4
R_2c8El8un2pOKblP	Government Researcher		TRUE	55	>12	0	TRUE	TRUE	TRUE	TRUE	5	Missed some minor points	Somewhat helpful	Fair	Half a Page
R_2qw30PA0WdmtiFZ	Assistant Professor	M	TRUE	35	>12	0	TRUE	TRUE	TRUE	TRUE	6+
R_3jZOvUPyWNSLUAc	Student	M	FALSE	45	1-3	0	TRUE	FALSE			4	Perfectly	Very helpful	Fair	A Page
R_QiRrTTT4dzcCLOp	Student	M	FALSE	48	4-6	0	FALSE	FALSE			3	Missed some minor points	Not at all	Unfair	1-2 Paragraphs
R_3NN3JDUuSO1HIbf	Professor	M	FALSE	18	10-12	0	FALSE	TRUE	TRUE	TRUE	3
R_1NymLZKZDG6ofiV	Student	M	TRUE	48	10-12	3	TRUE	TRUE	TRUE	TRUE	4	Missed some minor points	Somewhat helpful	Somewhat fair	A Page	0.75	0.75	0.75	0.5	0.75	1
R_1NymLZKZDG6ofiV	Student	M	TRUE	48	10-12	3	TRUE	TRUE	TRUE	TRUE	4	Misunderstood major points	Somewhat helpful	Somewhat fair	Multiple Pages	0.5	0.5	0.75	0.5	0.25	1
R_1NymLZKZDG6ofiV	Student	M	TRUE	48	10-12	3	TRUE	TRUE	TRUE	TRUE	4	Missed some minor points	Somewhat helpful	Somewhat fair	A Page	0.25	0.5	0.5	0.5	0.5	0.75
R_1NymLZKZDG6ofiV	Student	M	TRUE	48	10-12	3	TRUE	TRUE	TRUE	TRUE	4	Misunderstood major points	Not at all	Unfair	Half a Page	0.25	0.25	0.75	0.25	0.5	1
R_xx8FXs6OWDItj2x	Student	M	FALSE	48	4-6	0	TRUE	FALSE			4
R_phoNIxSTBnlSkPT	Professor	F	FALSE	15	4-6	1	TRUE	TRUE	TRUE	TRUE	3	Missed some minor points	Very helpful	Fair	Half a Page
R_phoNIxSTBnlSkPT	Professor	F	FALSE	28	4-6	0	FALSE	TRUE	TRUE	TRUE	3
R_QlWlQV3dy3YlC8x	Student	M	FALSE	52
R_1FwCPuzw4NBr9LL	Student	M	FALSE	11	7-9	0	FALSE	FALSE			4				A Page
R_t0dyjl218m95v7b	Student	M	TRUE	14	10-12	0	TRUE	TRUE	TRUE	TRUE	5
R_27rsiD1UtcihVa2	Industry Researcher	M	FALSE	1	1-3	0	TRUE	TRUE	TRUE	TRUE	4	Perfectly	Somewhat helpful	Fair	1-2 Paragraphs	0.333333	0.666667	0.333333	0.666667	0.666667	1	0.666667
R_27rsiD1UtcihVa2	Industry Researcher	M	FALSE	1	1-3	0	TRUE	TRUE	TRUE	TRUE	4	Perfectly	Somewhat helpful	Fair	1-2 Paragraphs	0.333333	0.666667	0.333333	0.666667	0.666667	1	0.666667
R_27rsiD1UtcihVa2	Industry Researcher	M	FALSE	1	1-3	0	TRUE	TRUE	TRUE	TRUE	4	Perfectly	Somewhat helpful	Fair	1-2 Paragraphs	0.333333	0.666667	0.333333	0.666667	0.666667	1	0.666667
R_27rsiD1UtcihVa2	Industry Researcher	M	FALSE	1	1-3	0	TRUE	TRUE	TRUE	TRUE	4	Perfectly	Somewhat helpful	Fair	1-2 Paragraphs	0.333333	0.666667	0.333333	0.666667	0.666667	1	0.666667
R_1nTpw8i99wQ25t3	Student	M	FALSE	14
R_3G0P03rLebPDX7O	Industry Researcher	M	TRUE	34	4-6	0	TRUE	TRUE	TRUE	FALSE	3	Missed some minor points	Somewhat helpful	Fair	A Page	0.333333
R_3G0P03rLebPDX7O	Industry Researcher	M	TRUE	34	4-6	0	TRUE	TRUE	TRUE	FALSE	3	Perfectly	Somewhat helpful	Fair	Half a Page	0.666667
R_3G0P03rLebPDX7O	Industry Researcher	M	TRUE	34	4-6	0	TRUE	TRUE	TRUE	FALSE	3	Perfectly	Somewhat helpful	Fair	Half a Page	0.666667
R_3NUOBb8f0X2IYnU	Student	M	FALSE	46	7-9	3	TRUE	TRUE	TRUE	TRUE	4	Missed some minor points	Somewhat helpful	Fair	A Page
R_2v9bgVfHacu0bDw	Student	M	FALSE	17	1-3	1	FALSE	FALSE			4	Missed some minor points	Somewhat helpful	Fair	A Page	0.5	0.5	0.5	0.5	0.5	0.75	0.5
R_2v9bgVfHacu0bDw	Student	M	FALSE	17	1-3	1	FALSE	FALSE			4	Missed some minor points	Somewhat helpful	Fair	A Page	0.5	0.5	0.5	0.5	0.5	0.75	0.5
R_2v9bgVfHacu0bDw	Student	M	FALSE	17	1-3	1	FALSE	FALSE			4	Missed some minor points	Somewhat helpful	Fair	A Page	0.5	0.5	0.5	0.5	0.5	0.75	0.5
R_2v9bgVfHacu0bDw	Student	M	FALSE	17	1-3	1	FALSE	FALSE			4	Missed some minor points	Somewhat helpful	Fair	A Page	0.5	0.5	0.5	0.5	0.5	0.75	0.5
R_2v9bgVfHacu0bDw	Student	M	FALSE	16	4-6	1	FALSE	TRUE	TRUE	TRUE	3
R_2rSLt5GXibHz5yH	Student	M	FALSE	31
R_1N4aJs3bJ3x7wmP	Industry Researcher	M	FALSE	11	>12	1	FALSE	FALSE			4	Missed some minor points	Somewhat helpful	Somewhat fair	Half a Page	0.25	0.5	1		0.5
R_1N4aJs3bJ3x7wmP	Industry Researcher	M	FALSE	11	>12	1	FALSE	FALSE			4	Missed some minor points	Somewhat helpful	Fair	Half a Page	0.75	0.75	0		0.75
R_1N4aJs3bJ3x7wmP	Industry Researcher	M	FALSE	11	>12	1	FALSE	FALSE			4	Perfectly	Somewhat helpful	Somewhat fair	Half a Page	0.75	0.75	1		0.5
R_1N4aJs3bJ3x7wmP	Industry Researcher	M	FALSE	11	>12	1	FALSE	FALSE			4	Missed some minor points	Not at all	Fair	1-2 Paragraphs	0.75	0.75	1		0.75
R_33wGMUQq3CENkU4	Professor	M	FALSE	22	10-12	0	FALSE	TRUE	TRUE	TRUE	4
R_W1AxzAMqKzKkWWd	Student	M	FALSE	12	4-6	0	FALSE	FALSE			6+	Perfectly	Somewhat helpful	Fair	A Page
R_2ups7365m87RWWw	Student	M	FALSE	4	4-6	0	TRUE	FALSE			3
R_1pnkaVieWR6ZSDF	Student	M	FALSE	2	>12	0	FALSE	TRUE	TRUE	TRUE	5	Missed some minor points	Somewhat helpful	Somewhat fair	A Page
R_77YTDkRKYCsNI53	Industry Researcher		FALSE	48	7-9	0	TRUE	FALSE			4	Missed some minor points	Somewhat helpful	Somewhat fair	Multiple Pages
R_2WGPl9QIbA4wVfo	Associate Professor	M	FALSE	31	4-6	0	FALSE	FALSE			3	Perfectly	Very helpful	Fair	A Page	0.5						0.666667
R_2WGPl9QIbA4wVfo	Associate Professor	M	FALSE	31	4-6	0	FALSE	FALSE			3	Perfectly	Very helpful	Fair	A Page	0.75						0.333333
R_2WGPl9QIbA4wVfo	Associate Professor	M	FALSE	31	4-6	0	FALSE	FALSE			3	Missed some minor points	Very helpful	Fair	A Page	0.5						0.333333
R_2WGPl9QIbA4wVfo	Associate Professor	M	FALSE	31	4-6	0	FALSE	FALSE			3					0.75						0.333333
R_2Uf3tpATXI7NUvZ	Professor	M	FALSE	11
R_28Ha1cEthpKoVkC	Professor	F	TRUE	48	>12	0	TRUE	FALSE			3	Misunderstood major points	Not at all		Half a Page
R_DN5kL81Xd5zLlWF	Assistant Professor	M	FALSE	39	>12	2	FALSE	TRUE	TRUE	TRUE	5	Missed some minor points	Somewhat helpful	Somewhat fair	Half a Page
R_3qrKRcGDa2kQCuI	Student	M	FALSE	18	1-3	0	FALSE	FALSE			3	Perfectly	Very helpful	Fair	Multiple Pages
R_6QKmbRxbF0TDBbH	Professor	M	FALSE	47	4-6	1	TRUE	TRUE	TRUE	TRUE	3	Perfectly	Somewhat helpful	Fair	1-2 Paragraphs	0.833333
R_6QKmbRxbF0TDBbH	Professor	M	FALSE	47	4-6	1	TRUE	TRUE	TRUE	TRUE	3	Perfectly	Somewhat helpful	Fair	1-2 Paragraphs	0.666667
R_6QKmbRxbF0TDBbH	Professor	M	FALSE	47	4-6	1	TRUE	TRUE	TRUE	TRUE	3	Perfectly	Somewhat helpful	Fair	1-2 Paragraphs	0.666667
R_2uPtf9OC41HYDHl	Student	M	FALSE	31	10-12	0	FALSE	TRUE	TRUE	TRUE	5	Missed some minor points	Somewhat helpful	Fair	A Page
R_2AKo4BmHWu495Bm	Associate Professor	M	FALSE	38	4-6	0	FALSE	TRUE	TRUE	TRUE	5
R_3PFVPP5KJZdEHaF				12
R_3MbTlW5LmB1KdWV	Assistant Professor	M	FALSE	3	>12	0	FALSE	TRUE	TRUE	TRUE	3	Perfectly	Somewhat helpful	Fair	A Page	0.75	0.75	0.5	0.75	0.75	0.75	1
R_3MbTlW5LmB1KdWV	Assistant Professor	M	FALSE	3	>12	0	FALSE	TRUE	TRUE	TRUE	3	Perfectly	Somewhat helpful	Fair	A Page	0.75	0.75	0.75	0.75	0.5	0.75	0.75
R_3MbTlW5LmB1KdWV	Assistant Professor	M	FALSE	3	>12	0	FALSE	TRUE	TRUE	TRUE	3	Perfectly	Somewhat helpful	Fair	A Page	0.75	0.75	0.75	0.75	0.75	0.75	1
R_b8wYjMuvtSLQNSV				9
R_CkLzAHy0Lvkp6wN	Student	M	FALSE	26	10-12	0	TRUE	TRUE	TRUE	FALSE	6+	Perfectly	Very helpful	Fair	A Page	0.25	1	0.666667	1	0.333333		1
R_CkLzAHy0Lvkp6wN	Student	M	FALSE	26	10-12	0	TRUE	TRUE	TRUE	FALSE	6+	Perfectly	Very helpful	Fair	Multiple Pages	0.75	0.666667	0.333333	0.666667	0.666667		0.666667
R_CkLzAHy0Lvkp6wN	Student	M	FALSE	26	10-12	0	TRUE	TRUE	TRUE	FALSE	6+	Missed some minor points	Somewhat helpful	Fair	Half a Page	0.5	0.666667	0.666667	0.666667	0.666667		0.333333
R_CkLzAHy0Lvkp6wN	Student	M	FALSE	26	10-12	0	TRUE	TRUE	TRUE	FALSE	6+	Missed some minor points	Very helpful	Fair	A Page	0.25	0.666667	0.333333	0.666667	0.666667		0.333333
R_CkLzAHy0Lvkp6wN	Student	M	FALSE	26	10-12	0	TRUE	TRUE	TRUE	FALSE	6+	Perfectly	Very helpful	Fair	A Page	0.5	0.666667	0.666667	0.666667	0.333333		0.666667
R_CkLzAHy0Lvkp6wN	Student	M	FALSE	26	10-12	0	TRUE	TRUE	TRUE	FALSE	6+	Perfectly	Somewhat helpful	Fair	Multiple Pages	0.75	0.666667	0.666667	0.666667	0.666667		0.333333
R_3EKj6DvvtfaAq43	Associate Professor	M	FALSE	47	4-6	1	TRUE	TRUE	TRUE	TRUE	4
R_31KtZpj7YrTzZtw	Student	M	FALSE	52	7-9	0	FALSE	FALSE			4	Perfectly	Somewhat helpful	Fair	1-2 Paragraphs
R_3e3a1uT4ORJBlAv				33
R_30Or7XVSZLQojOp	Student	M	FALSE	31	7-9	0	FALSE	TRUE	TRUE	TRUE	5	Missed some minor points	Somewhat helpful	Fair	Multiple Pages
R_1H7fcEa3NI28HvH	Student	M	FALSE	18	7-9	0	FALSE	TRUE	TRUE	TRUE	3	Missed some minor points	Somewhat helpful	Fair	1-2 Paragraphs	0.333333	0.666667	1	0.666667	0.333333	1	1
R_1H7fcEa3NI28HvH	Student	M	FALSE	18	7-9	0	FALSE	TRUE	TRUE	TRUE	3	Perfectly	Somewhat helpful	Fair	1-2 Paragraphs	1	1	1	0.666667	0.666667	1	1
R_1H7fcEa3NI28HvH	Student	M	FALSE	18	7-9	0	FALSE	TRUE	TRUE	TRUE	3	Perfectly	Very helpful	Fair	1-2 Paragraphs	0.666667	0.666667	1	1	0.666667	0.666667	0.666667
R_32WwviIHvc11Lb9	Student	M	TRUE	19			TRUE
R_2V2sRHFlRhKeWGY	Student	M	FALSE	48
R_sGxPf2KBWUJh9VD	Government Researcher	M	TRUE	39	>12	0	TRUE	TRUE	TRUE	TRUE	5	Missed some minor points	Very helpful	Fair	Multiple Pages
R_sGxPf2KBWUJh9VD	Government Researcher	M	TRUE	52	7-9	1	TRUE	FALSE			4	Missed some minor points	Somewhat helpful	Fair	Half a Page
R_W7OSFBPurhjp3X3	Student	M	FALSE	44	1-3	0	FALSE	TRUE	TRUE	TRUE	4	Perfectly	Very helpful	Fair	1-2 Paragraphs
R_W7OSFBPurhjp3X3	Student	M	FALSE	44	1-3	0	FALSE	TRUE	TRUE	TRUE	4	Perfectly	Very helpful	Fair	A Page
R_W7OSFBPurhjp3X3	Student	M	FALSE	44	1-3	0	FALSE	TRUE	TRUE	TRUE	4	Perfectly	Very helpful	Fair	1-2 Paragraphs
R_W7OSFBPurhjp3X3	Student	M	FALSE	44	1-3	0	FALSE	TRUE	TRUE	TRUE	4	Perfectly	Very helpful	Fair	Half a Page
R_31saJcXQ0J8brqo	Government Researcher	M	FALSE	1	4-6	0	TRUE	FALSE			4	Misunderstood major points	Somewhat helpful	Somewhat fair	A Page
R_31saJcXQ0J8brqo	Government Researcher	M	FALSE	30	4-6	0	TRUE	TRUE	TRUE	TRUE	6+	Missed some minor points	Somewhat helpful	Somewhat fair	A Page	0.25	0.75	0.75	0.25	0.25	0.5	0.75
R_31saJcXQ0J8brqo	Government Researcher	M	FALSE	30	4-6	0	TRUE	TRUE	TRUE	TRUE	6+	Missed some minor points	Not at all	Fair	A Page	0.75	0.75	0.75	0.5	0.5	0.75	0.25
R_31saJcXQ0J8brqo	Government Researcher	M	FALSE	30	4-6	0	TRUE	TRUE	TRUE	TRUE	6+	Missed some minor points	Somewhat helpful	Fair	A Page	0.75	0.5	0.75	0.5	0.25	0.75	0.5
R_31saJcXQ0J8brqo	Government Researcher	M	FALSE	30	4-6	0	TRUE	TRUE	TRUE	TRUE	6+	Perfectly	Somewhat helpful	Fair	Half a Page	1	0.75	0.75	0.5	0.75	1	0.75
R_31saJcXQ0J8brqo	Government Researcher	M	FALSE	30	4-6	0	TRUE	TRUE	TRUE	TRUE	6+	Misunderstood major points	Not at all	Somewhat fair	Half a Page	0.5	0.75	0.5	0.5	0.5	0.75	0.5
R_31saJcXQ0J8brqo	Government Researcher	M	FALSE	30	4-6	0	TRUE	TRUE	TRUE	TRUE	6+	Missed some minor points	Somewhat helpful	Somewhat fair	Multiple Pages	0.5	0.5	0.25	0.5	0.5	0.5	0.5
R_22JRCKbLtPqeRTC	Associate Professor	M	FALSE	45	7-9	9	FALSE	TRUE	TRUE	TRUE	3				A Page
R_2P50rxjYKrQ3FzI	Industry Researcher	M	FALSE	45	7-9	3	FALSE	FALSE			4	Missed some minor points	Somewhat helpful	Fair	1-2 Paragraphs	0.666667	0.666667	0.666667	0.333333	0.666667	1	0.666667
R_2P50rxjYKrQ3FzI	Industry Researcher	M	FALSE	45	7-9	3	FALSE	FALSE			4	Misunderstood major points	Not at all	Somewhat fair	1-2 Paragraphs	0.333333	0.333333	0.666667	0.333333	0.333333	0.666667	0.666667
R_2P50rxjYKrQ3FzI	Industry Researcher	M	FALSE	45	7-9	3	FALSE	FALSE			4	Perfectly	Somewhat helpful	Fair	1-2 Paragraphs	0.666667	0.666667	0.666667	0.666667	0.666667	0.666667	0.666667
R_2P50rxjYKrQ3FzI	Industry Researcher	M	FALSE	45	7-9	3	FALSE	FALSE			4	Perfectly	Somewhat helpful	Fair	1-2 Paragraphs	0.333333	0.666667	0.666667	0.666667	0.666667	0.333333	0
R_3k0xNbWtLq8z1rw	Professor	M	FALSE	22
R_urJUid7CZmmb7fr	Assistant Professor	M	TRUE	21	4-6	0	TRUE	FALSE			4
R_2QgtBcd2Z6ZCdgQ	Professor	M	FALSE	53	4-6	0	TRUE	TRUE	TRUE	TRUE	4
R_PBgBD3sn6oeQFmF	Assistant Professor	M	FALSE	23
R_2WVArArN44eBEm7	Student	M	TRUE	22			TRUE
R_3JmgwGzrMbMRPAh	Student		TRUE	2	1-3	1	TRUE	TRUE	TRUE	TRUE	5	Perfectly	Not at all	Fair	1-2 Paragraphs	0.5	0.75	0.5		0.25		0.25
R_3JmgwGzrMbMRPAh	Student		TRUE	2	1-3	1	TRUE	TRUE	TRUE	TRUE	5	Perfectly	Somewhat helpful	Fair	Half a Page	0.75	0.75	0.75		0.25		0.5
R_3JmgwGzrMbMRPAh	Student		TRUE	2	1-3	1	TRUE	TRUE	TRUE	TRUE	5	Missed some minor points	Not at all	Somewhat fair	Half a Page	0.5	0.75	0.75		0.25		0.5
R_3JmgwGzrMbMRPAh	Student		TRUE	2	1-3	1	TRUE	TRUE	TRUE	TRUE	5	Missed some minor points	Somewhat helpful	Fair	A Page	0.5	0.75	0.75		0.5		0.5
R_3JmgwGzrMbMRPAh	Student		TRUE	2	1-3	1	TRUE	TRUE	TRUE	TRUE	5	Perfectly	Very helpful	Fair	Multiple Pages	0.5	0.5	0.75		0.5		1
R_43dv38xugu7wrGp	Industry Researcher	M	FALSE	18	4-6	0	TRUE	TRUE	TRUE	TRUE	5	Perfectly	Not at all	Fair	Half a Page	0.833333	1			1		1
R_43dv38xugu7wrGp	Industry Researcher	M	FALSE	18	4-6	0	TRUE	TRUE	TRUE	TRUE	5	Perfectly	Somewhat helpful	Fair	Multiple Pages	0.5	1			0.75		0.666667
R_43dv38xugu7wrGp	Industry Researcher	M	FALSE	18	4-6	0	TRUE	TRUE	TRUE	TRUE	5	Perfectly	Not at all	Fair	A Page	0.666667	1			0.75		0.333333
R_43dv38xugu7wrGp	Industry Researcher	M	FALSE	18	4-6	0	TRUE	TRUE	TRUE	TRUE	5	Missed some minor points	Not at all	Somewhat fair	Multiple Pages	0.5	0.5			0.5		0.666667
R_2Y9sPLmoHF9geNe	Student	M	TRUE	53	4-6	0	TRUE	TRUE	TRUE	TRUE	4
R_1LUc2FRdqaBlP2I	Student	M	FALSE	40	10-12	0	FALSE	FALSE			3
R_3Mh5uwpQZUkKtQ2	Associate Professor	M	FALSE	18	>12	0	FALSE	TRUE	TRUE	TRUE	3
R_33jLfNzD4T3iayf	Postdoctoral Researcher		FALSE	46
R_1GHOezOviykrNTP	Student	M	TRUE	26			TRUE
R_1jOEMGi7ovoKU81	Associate Professor	M	FALSE	7	10-12	0	TRUE	FALSE			3	Missed some minor points	Somewhat helpful	Somewhat fair	A Page	0.75	0.75	0.75	0.5	0.75	1	0.5
R_1jOEMGi7ovoKU81	Associate Professor	M	FALSE	7	10-12	0	TRUE	FALSE			3	Perfectly	Somewhat helpful	Somewhat fair	A Page	0.75	1	0.75	1	0.75	1	0.25
R_1jOEMGi7ovoKU81	Associate Professor	M	FALSE	7	10-12	0	TRUE	FALSE			3	Misunderstood major points	Not at all	Unfair	A Page	0.5	0.5	0.25	0.75	0.25	1	0.5
R_245ByirXWuO8Wnp	Professor		FALSE	39
R_26mQ1g562BS2IK9	Government Researcher	M	FALSE	55	>12	0	TRUE	TRUE	TRUE	TRUE	4
R_1HZpwkq7e45pNDz	Industry Researcher		FALSE	53	4-6	0	TRUE	TRUE	TRUE	TRUE	4
R_3NDKEGxiVKsEto3	Student	M	FALSE	11	4-6	1	FALSE	FALSE			4	Perfectly	Somewhat helpful	Fair	A Page	0.666667	0.75	1		0.333333
R_3NDKEGxiVKsEto3	Student	M	FALSE	11	4-6	1	FALSE	FALSE			4	Missed some minor points	Somewhat helpful	Fair	Multiple Pages	0.666667	0.75	1		0.666667
R_3NDKEGxiVKsEto3	Student	M	FALSE	11	4-6	1	FALSE	FALSE			4	Perfectly	Somewhat helpful	Fair	A Page	0.666667	1	1		0.666667
R_3NDKEGxiVKsEto3	Student	M	FALSE	11	4-6	1	FALSE	FALSE			4	Missed some minor points	Somewhat helpful	Somewhat fair	Half a Page	0.333333	1	1		0.666667
R_2VrvsPkjZRmNRpH	Postdoctoral Researcher	F	FALSE	42	7-9	1	FALSE	TRUE	TRUE	TRUE	4	Perfectly	Very helpful	Fair	Half a Page
R_3lKOwx1yJaOjjrQ	Professor	M	FALSE	44	>12	0	TRUE	FALSE			4	Perfectly	Very helpful	Fair	Half a Page	0.5
R_3lKOwx1yJaOjjrQ	Professor	M	FALSE	44	>12	0	TRUE	FALSE			4	Perfectly	Very helpful	Fair	1-2 Paragraphs	0.666667
R_3lKOwx1yJaOjjrQ	Professor	M	FALSE	44	>12	0	TRUE	FALSE			4	Perfectly	Very helpful	Fair	A Page	0.666667
R_3lKOwx1yJaOjjrQ	Professor	M	FALSE	44	>12	0	TRUE	FALSE			4	Perfectly	Very helpful	Fair	Half a Page	0.833333
R_3kLNOrXWE4vVvbe	Postdoctoral Researcher	M	FALSE	4	7-9	0	FALSE	FALSE			3	Missed some minor points	Somewhat helpful	Fair	Half a Page	0.833333
R_3kLNOrXWE4vVvbe	Postdoctoral Researcher	M	FALSE	4	7-9	0	FALSE	FALSE			3	Missed some minor points	Very helpful	Fair	A Page	1
R_3kLNOrXWE4vVvbe	Postdoctoral Researcher	M	FALSE	4	7-9	0	FALSE	FALSE			3	Missed some minor points	Not at all	Fair	1-2 Paragraphs	0.833333
R_2rqMuKcrGZTg1Jd	Student	M	FALSE	42	4-6	0	FALSE	TRUE	TRUE	TRUE	4	Perfectly	Somewhat helpful	Somewhat fair	Half a Page
R_O9W30qC3ndRARbj	Professor	M	FALSE	19	4-6	0	FALSE	TRUE	TRUE	TRUE	4
R_AHYvEOqzs5Cv14t	Student	M	FALSE	47	>12	2	FALSE	FALSE			3	Perfectly	Somewhat helpful	Fair	A Page
R_3rVtd5q9QYYjBtP	Student		FALSE	16	4-6	1	FALSE	FALSE			4	Perfectly	Very helpful	Fair	A Page
R_1Hcxga3lv84C9Ab	Student	M	FALSE	33	10-12	0	TRUE	FALSE			4
R_1QLwr1bww9omKxr	Industry Researcher	M	FALSE	37	4-6	1	FALSE	FALSE			4	Missed some minor points	Somewhat helpful	Fair	A Page	0.333333	0.666667		0			0.333333
R_1QLwr1bww9omKxr	Industry Researcher	M	FALSE	37	4-6	1	FALSE	FALSE			4	Missed some minor points	Somewhat helpful	Somewhat fair	Half a Page	0.666667	0.666667		0.666667			0.666667
R_1QLwr1bww9omKxr	Industry Researcher	M	FALSE	37	4-6	1	FALSE	FALSE			4	Missed some minor points	Somewhat helpful	Somewhat fair	A Page	0.666667	0.666667		1			0.333333
R_1QLwr1bww9omKxr	Industry Researcher	M	FALSE	37	4-6	1	FALSE	FALSE			4	Missed some minor points	Very helpful	Fair	Multiple Pages	1	0.666667		1			0.333333
R_eXqePFAldBjl3I5	Professor	M	TRUE	10	>12	1	TRUE	FALSE			5	Misunderstood major points	Somewhat helpful	Fair	1-2 Paragraphs		0.5		0.25	0	0	0.5
R_eXqePFAldBjl3I5	Professor	M	TRUE	10	>12	1	TRUE	FALSE			5	Missed some minor points	Somewhat helpful	Fair	1-2 Paragraphs		1		0.75	0.25	0.5	0.5
R_eXqePFAldBjl3I5	Professor	M	TRUE	10	>12	1	TRUE	FALSE			5	Missed some minor points	Very helpful	Fair	A Page		0.75		0.5	0.75	0.75	0.25
R_eXqePFAldBjl3I5	Professor	M	TRUE	10	>12	1	TRUE	FALSE			5	Missed some minor points	Very helpful	Fair	A Page		0.5		0.5	0.25	0.25	0.5
R_eXqePFAldBjl3I5	Professor	M	TRUE	10	>12	1	TRUE	FALSE			5	Perfectly	Very helpful	Fair	A Page		0.5		0.5	0.25	0	0.5
R_eXqePFAldBjl3I5	Professor	M	TRUE	51	10-12	0	TRUE	FALSE			3	Perfectly	Somewhat helpful	Fair	Half a Page
R_tY81OEhdI5Ldn6F	Professor	M	FALSE	23	10-12	0	TRUE	FALSE			4	Missed some minor points	Somewhat helpful	Somewhat fair	Half a Page	0.5
R_tY81OEhdI5Ldn6F	Professor	M	FALSE	23	10-12	0	TRUE	FALSE			4	Perfectly	Somewhat helpful	Fair	Half a Page	1
R_tY81OEhdI5Ldn6F	Professor	M	FALSE	23	10-12	0	TRUE	FALSE			4	Missed some minor points	Somewhat helpful	Somewhat fair	Half a Page	0.75
R_tY81OEhdI5Ldn6F	Professor	M	FALSE	23	10-12	0	TRUE	FALSE			4	Perfectly	Somewhat helpful	Fair	1-2 Paragraphs	1
R_2QRPoNBsUWJsGbI				34
R_wZV3gbW9veu7qbD	Associate Professor	M	FALSE	47	4-6	0	FALSE	FALSE			3
R_2af7TbmZsHf0zYQ	Postdoctoral Researcher	M	FALSE	53	10-12	0	FALSE	TRUE	TRUE	TRUE	3	Perfectly	Somewhat helpful	Fair	Half a Page
R_CdcEoWUGPuyVwDn	Industry Researcher	M	TRUE	55	>12	0	TRUE	TRUE	TRUE	TRUE	6+	Perfectly	Somewhat helpful	Fair	A Page
R_3pbDxW60dk7ooRd	Government Researcher	Other	FALSE	50	4-6	0	FALSE	TRUE	TRUE	TRUE	6+	Perfectly	Very helpful	Fair	Multiple Pages	0.75				0.5		0.75
R_3pbDxW60dk7ooRd	Government Researcher	Other	FALSE	50	4-6	0	FALSE	TRUE	TRUE	TRUE	6+	Missed some minor points	Somewhat helpful	Fair	Half a Page	0.5				0.5		0.75
R_3pbDxW60dk7ooRd	Government Researcher	Other	FALSE	50	4-6	0	FALSE	TRUE	TRUE	TRUE	6+	Misunderstood major points	Not at all	Somewhat fair	A Page	0.75				0.25		0.75
R_3pbDxW60dk7ooRd	Government Researcher	Other	FALSE	50	4-6	0	FALSE	TRUE	TRUE	TRUE	6+	Perfectly	Somewhat helpful	Fair	1-2 Paragraphs	0.75				0.25		0.75
R_3pbDxW60dk7ooRd	Government Researcher	Other	FALSE	50	4-6	0	FALSE	TRUE	TRUE	TRUE	6+	Missed some minor points	Somewhat helpful	Fair	A Page	0.5				0.25		0.75
R_3pbDxW60dk7ooRd	Government Researcher	Other	FALSE	50	4-6	0	FALSE	TRUE	TRUE	TRUE	6+	Missed some minor points	Somewhat helpful	Fair	1-2 Paragraphs	0.5				0.5		0.5
R_3rPzmx42YHvT6lE	Industry Researcher	M	FALSE	34	10-12	2	FALSE	TRUE	TRUE	TRUE	5	Perfectly	Very helpful	Fair	Multiple Pages
R_3QF2jwiut3pSnF3	Student	M	FALSE	19	4-6	1	TRUE	TRUE	TRUE	TRUE	3	Missed some minor points	Very helpful	Fair	Half a Page	0.666667
R_3QF2jwiut3pSnF3	Student	M	FALSE	19	4-6	1	TRUE	TRUE	TRUE	TRUE	3	Perfectly	Somewhat helpful	Fair	1-2 Paragraphs	0.833333
R_3QF2jwiut3pSnF3	Student	M	FALSE	19	4-6	1	TRUE	TRUE	TRUE	TRUE	3	Missed some minor points	Very helpful	Fair	Half a Page	0.5
R_2w1su3rlOazGvey				54
R_1C77AT1G0A8WazH	Other	M	FALSE	5	4-6	0	FALSE	TRUE	TRUE	TRUE	3
R_238h7ZwvzMoGklD	Associate Professor	M	FALSE	56	1-3	1	FALSE	TRUE	TRUE	TRUE	4	Perfectly	Somewhat helpful	Fair	A Page
R_30x8kGMSnaLnAPx	Professor	M	FALSE	3	4-6	0	FALSE	FALSE			4
R_294wXarsWmkFBQh	Student	F	FALSE	47	10-12	1	TRUE	FALSE			4	Missed some minor points	Very helpful	Fair	Half a Page	0.666667	0.666667	0.666667	0.666667	0.666667	0.666667	0.666667
R_294wXarsWmkFBQh	Student	F	FALSE	47	10-12	1	TRUE	FALSE			4	Perfectly	Very helpful	Fair	A Page	0.666667	0.666667	0.666667	0.666667	0.666667	0.666667	0.666667
R_294wXarsWmkFBQh	Student	F	FALSE	47	10-12	1	TRUE	FALSE			4	Missed some minor points	Very helpful	Fair	1-2 Paragraphs	0.666667	0.666667	0.666667	0.666667	0.666667	0.666667	0.666667
R_294wXarsWmkFBQh	Student	F	FALSE	47	10-12	1	TRUE	FALSE			4	Perfectly	Very helpful	Fair	1-2 Paragraphs	0.666667	0.666667	0.666667	0.666667	0.666667	0.666667	0.666667
R_3nwNuwmc0p1YaQR	Student	M	FALSE	26
R_2tMcZ7orLF5b7DB	Postdoctoral Researcher	M	TRUE	18	10-12	1	TRUE	TRUE	TRUE	TRUE	3	Perfectly	Very helpful	Fair	Multiple Pages	0.666667	0.5			0.75		0.666667
R_2tMcZ7orLF5b7DB	Postdoctoral Researcher	M	TRUE	18	10-12	1	TRUE	TRUE	TRUE	TRUE	3	Perfectly	Somewhat helpful	Fair	A Page	0.5	1			0.75		0.666667
R_2tMcZ7orLF5b7DB	Postdoctoral Researcher	M	TRUE	18	10-12	1	TRUE	TRUE	TRUE	TRUE	3	Misunderstood major points	Somewhat helpful	Unfair	A Page	0.166667	1			0.25		0.666667
R_2tMcZ7orLF5b7DB	Postdoctoral Researcher	M	TRUE	18	7-9	0	TRUE	TRUE	FALSE	FALSE	3	Perfectly	Somewhat helpful	Fair	Multiple Pages	0.666667	0.5			0.75		1
R_2tMcZ7orLF5b7DB	Postdoctoral Researcher	M	TRUE	18	7-9	0	TRUE	TRUE	FALSE	FALSE	3	Missed some minor points	Not at all	Fair	Half a Page	0.666667	1			0.5		0.666667
R_2tMcZ7orLF5b7DB	Postdoctoral Researcher	M	TRUE	18	7-9	0	TRUE	TRUE	FALSE	FALSE	3	Perfectly	Somewhat helpful	Fair	A Page	0.833333	1			0.75		1
R_3Ra4LNv5gZsBfPF	Industry Researcher	F	FALSE	15
R_30k7ioUamEy2SV1	Other	M	FALSE	9	1-3	9	FALSE	FALSE			4
R_1ml49lTu3siccWb	Student	M	FALSE	37	10-12	0	FALSE	TRUE	TRUE	TRUE	3	Missed some minor points	Somewhat helpful	Fair	Half a Page
R_25YPGuTMYLatcCZ	Assistant Professor	M	TRUE	21	4-6	0	TRUE	FALSE			5	Missed some minor points	Not at all	Somewhat fair	A Page	0.25						0.333333
R_25YPGuTMYLatcCZ	Assistant Professor	M	TRUE	21	4-6	0	TRUE	FALSE			5	Missed some minor points	Somewhat helpful	Fair	A Page	0.75						0.333333
R_25YPGuTMYLatcCZ	Assistant Professor	M	TRUE	21	4-6	0	TRUE	FALSE			5	Perfectly	Somewhat helpful	Fair	A Page	0.75						0.333333
R_25YPGuTMYLatcCZ	Assistant Professor	M	TRUE	21	4-6	0	TRUE	FALSE			5	Perfectly	Very helpful	Fair	A Page	0.75						0.333333
R_25YPGuTMYLatcCZ	Assistant Professor	M	TRUE	21	4-6	0	TRUE	FALSE			5	Perfectly	Very helpful	Fair	Multiple Pages	0.5						1
R_3hECk804hmvYWML	Student	M	FALSE	21	>12	1	FALSE	FALSE			5	Perfectly	Somewhat helpful	Fair	A Page
R_2TTxn73p8LpTrpb	Student	M	FALSE	39	10-12	4	FALSE	TRUE	TRUE	TRUE	5	Missed some minor points	Somewhat helpful	Somewhat fair	A Page
R_2aaGsNui1wbVyXb	Industry Researcher	M	FALSE	22	>12	2	FALSE	TRUE	TRUE	TRUE	4	Misunderstood major points	Not at all	Unfair	A Page	0.25						0.333333
R_2aaGsNui1wbVyXb	Industry Researcher	M	FALSE	22	>12	2	FALSE	TRUE	TRUE	TRUE	4	Perfectly	Somewhat helpful	Fair	A Page	0.5						0.666667
R_2aaGsNui1wbVyXb	Industry Researcher	M	FALSE	22	>12	2	FALSE	TRUE	TRUE	TRUE	4	Perfectly	Somewhat helpful	Fair	A Page	0.75						0.333333
R_2aaGsNui1wbVyXb	Industry Researcher	M	FALSE	22	>12	2	FALSE	TRUE	TRUE	TRUE	4	Perfectly	Somewhat helpful	Fair	Half a Page
R_2aaGsNui1wbVyXb	Industry Researcher	M	FALSE	51	1-3	0	FALSE	FALSE			3	Perfectly			Half a Page	0.75						0.333333
R_2aaGsNui1wbVyXb	Industry Researcher	M	FALSE	51	1-3	0	FALSE	FALSE			3	Perfectly			Half a Page	0.5						0.666667
R_2aaGsNui1wbVyXb	Industry Researcher	M	FALSE	51	1-3	0	FALSE	FALSE			3	Perfectly			Half a Page	0.5						0.666667
R_2xPMpASubSpliFO	Student	M	FALSE	14	>12	0	FALSE	TRUE	TRUE	TRUE	5	Perfectly	Very helpful	Somewhat fair	A Page	0.75
R_2xPMpASubSpliFO	Student	M	FALSE	14	>12	0	FALSE	TRUE	TRUE	TRUE	5	Perfectly	Somewhat helpful	Fair	A Page	0.75
R_2xPMpASubSpliFO	Student	M	FALSE	14	>12	0	FALSE	TRUE	TRUE	TRUE	5	Perfectly	Somewhat helpful	Somewhat fair	A Page	0.75
R_2xPMpASubSpliFO	Student	M	FALSE	14	>12	0	FALSE	TRUE	TRUE	TRUE	5	Missed some minor points	Somewhat helpful	Somewhat fair	A Page	0.25
R_2xPMpASubSpliFO	Student	M	FALSE	14	>12	0	FALSE	TRUE	TRUE	TRUE	5	Missed some minor points	Somewhat helpful	Fair	Multiple Pages	0.25
R_3dTkUxPWyWtrwH4	Industry Researcher	M	TRUE	50			TRUE
R_3FVwaEhMc5UNOHV	Industry Researcher	M	TRUE	34			TRUE
R_0oHzblb0MDc7kL7	Student	M	FALSE	49	>12	0	FALSE	FALSE			6+
R_ueoxS8aujuhS0x3				56
R_2VmcJV0eyqstrHE	Industry Researcher	M	FALSE	7
R_1Pe34hnK3JQUQVy	Industry Researcher	M	FALSE	38	>12	0	FALSE	TRUE	TRUE	TRUE	5	Missed some minor points	Somewhat helpful	Fair	Half a Page	0.75		1		0.666667		1
R_1Pe34hnK3JQUQVy	Industry Researcher	M	FALSE	38	>12	0	FALSE	TRUE	TRUE	TRUE	5	Missed some minor points	Very helpful	Fair	Multiple Pages	0.25		0.666667		0.333333		0.666667
R_1Pe34hnK3JQUQVy	Industry Researcher	M	FALSE	38	>12	0	FALSE	TRUE	TRUE	TRUE	5	Missed some minor points	Very helpful	Fair	Multiple Pages	0.25		1		0.333333		1
R_1Pe34hnK3JQUQVy	Industry Researcher	M	FALSE	38	>12	0	FALSE	TRUE	TRUE	TRUE	5	Missed some minor points	Very helpful	Fair	A Page	0.75		0.666667		0.666667		0.333333
R_1Pe34hnK3JQUQVy	Industry Researcher	M	FALSE	38	>12	0	FALSE	TRUE	TRUE	TRUE	5	Missed some minor points	Very helpful	Fair	A Page	0.75		1		0.666667		0.666667
R_1Pe34hnK3JQUQVy	Industry Researcher	M	FALSE	38	>12	0	TRUE	TRUE	TRUE	TRUE	5	Missed some minor points	Somewhat helpful	Fair	Half a Page	0.5		1		0.666667		1
R_1Pe34hnK3JQUQVy	Industry Researcher	M	FALSE	38	>12	0	TRUE	TRUE	TRUE	TRUE	5	Missed some minor points	Very helpful	Fair	Half a Page	0.5		0.666667		0.666667		0.333333
R_1Pe34hnK3JQUQVy	Industry Researcher	M	FALSE	38	>12	0	TRUE	TRUE	TRUE	TRUE	5	Missed some minor points	Very helpful	Fair	Half a Page	0.25		0.333333		0.333333		0.666667
R_1Pe34hnK3JQUQVy	Industry Researcher	M	FALSE	38	>12	0	TRUE	TRUE	TRUE	TRUE	5	Missed some minor points	Somewhat helpful	Fair	Half a Page	0.5		0.666667		0.333333		0.666667
R_1Pe34hnK3JQUQVy	Industry Researcher	M	FALSE	38	>12	0	TRUE	TRUE	TRUE	TRUE	5	Missed some minor points	Somewhat helpful	Fair	Half a Page	0.75		1		0.666667		0.333333
R_1DpwvoXyhMSyhNy	Student		FALSE	39	10-12	0	TRUE	TRUE	TRUE	TRUE	5	Missed some minor points	Very helpful	Fair	Multiple Pages
R_3CNTUQ5T0SwI7Oz	Student	M	FALSE	8	10-12	0	FALSE	TRUE	TRUE	TRUE	4	Perfectly	Very helpful	Fair	Half a Page	0.666667	0.666667	0.666667	0.666667	0.666667	0.666667	0.666667
R_3CNTUQ5T0SwI7Oz	Student	M	FALSE	8	10-12	0	FALSE	TRUE	TRUE	TRUE	4	Perfectly	Very helpful	Fair	1-2 Paragraphs	0.666667	0.666667	0.666667	0.666667	0.666667	0.666667	0.666667
R_3CNTUQ5T0SwI7Oz	Student	M	FALSE	8	10-12	0	FALSE	TRUE	TRUE	TRUE	4	Perfectly	Very helpful	Fair	1-2 Paragraphs	0.666667	0.666667	0.666667	0.666667	0.666667	0.666667	0.666667
R_3CNTUQ5T0SwI7Oz	Student	M	FALSE	8	10-12	0	FALSE	TRUE	TRUE	TRUE	4	Perfectly	Very helpful	Fair	1-2 Paragraphs	0.666667	0.666667	0.666667	0.666667	0.666667	0.666667	0.666667
R_AMBKXmKcAWpL5eh	Government Researcher	M	TRUE	36	>12	0	TRUE	FALSE			3	Perfectly	Very helpful	Fair	Multiple Pages	0.5	0.5	0.75	0.5	0.5		0.5
R_AMBKXmKcAWpL5eh	Government Researcher	M	TRUE	36	>12	0	TRUE	FALSE			3	Perfectly	Very helpful	Fair	Multiple Pages	0.5	0.5	0.5	0.75	0.5		0.5
R_AMBKXmKcAWpL5eh	Government Researcher	M	TRUE	36	>12	0	TRUE	FALSE			3	Perfectly	Somewhat helpful	Fair	Multiple Pages	0.5	0.25	0.5	0.75	0.25		0.5
R_24nPPaAzhxienJN	Professor	M	FALSE	10
R_V21XWendShj91Yd	Industry Researcher	F	FALSE	39	4-6	1	TRUE	TRUE	TRUE	TRUE	5	Missed some minor points	Very helpful	Somewhat fair	Multiple Pages	0.666667	1	1	0.777778	0.777778	1	1
R_V21XWendShj91Yd	Industry Researcher	F	FALSE	39	4-6	1	TRUE	TRUE	TRUE	TRUE	5	Perfectly	Very helpful	Fair	A Page	1	1	1	1	1	1	1
R_V21XWendShj91Yd	Industry Researcher	F	FALSE	39	4-6	1	TRUE	TRUE	TRUE	TRUE	5	Perfectly	Very helpful	Fair	A Page	1	1	1	1	1	1	1
R_V21XWendShj91Yd	Industry Researcher	F	FALSE	39	4-6	1	TRUE	TRUE	TRUE	TRUE	5	Perfectly	Very helpful	Fair	Multiple Pages	1	1	1	1	1	1	1
R_V21XWendShj91Yd	Industry Researcher	F	FALSE	39	4-6	1	TRUE	TRUE	TRUE	TRUE	5	Perfectly	Very helpful	Fair	A Page	1	1	1	1	1	1	1
R_2ePcJOwYhoPrIGd	Student	M	FALSE	2	7-9	1	FALSE	TRUE	TRUE	TRUE	5
R_yjOl3oAALkLsDXH	Professor	M	TRUE	48	1-3	1	TRUE	FALSE			3	Perfectly	Very helpful	Fair	1-2 Paragraphs
R_3r22KuVVlltVM5p	Government Researcher	M	FALSE	23	4-6	0	FALSE	FALSE			3	Missed some minor points	Somewhat helpful	Fair	A Page
R_21bIwXUjO1aP8t8				25
R_21d2Fo2pT9BII0R				12
R_5inle6pcDBMw0dr	Student	F	TRUE	26			TRUE
R_22ldAnjns1z0YKD	Assistant Professor	M	TRUE	7	>12	2	TRUE	TRUE	TRUE	TRUE	4	Missed some minor points	Somewhat helpful	Fair	Half a Page	0.666667						0.666667
R_22ldAnjns1z0YKD	Assistant Professor	M	TRUE	7	>12	2	TRUE	TRUE	TRUE	TRUE	4	Missed some minor points	Somewhat helpful	Fair	A Page	0.666667						0.666667
R_22ldAnjns1z0YKD	Assistant Professor	M	TRUE	7	>12	2	TRUE	TRUE	TRUE	TRUE	4	Missed some minor points	Somewhat helpful	Fair	A Page	0.666667						0.666667
R_22ldAnjns1z0YKD	Assistant Professor	M	TRUE	53	>12	2	TRUE	TRUE	TRUE	FALSE	3	Misunderstood major points	Somewhat helpful	Somewhat fair	Half a Page	0.4
R_22ldAnjns1z0YKD	Assistant Professor	M	TRUE	53	>12	2	TRUE	TRUE	TRUE	FALSE	3	Misunderstood major points	Not at all	Unfair	Half a Page	0.4
R_22ldAnjns1z0YKD	Assistant Professor	M	TRUE	53	>12	2	TRUE	TRUE	TRUE	FALSE	3	Missed some minor points	Somewhat helpful	Unfair	Half a Page	0.4
R_pELHVJmOk5cQEGl	Associate Professor	M	FALSE	23	4-6	1	FALSE	FALSE			3
R_3s0nPO1BreVpQn9	Industry Researcher	M	FALSE	23	1-3	0	FALSE	TRUE	FALSE	TRUE	3	Missed some minor points	Somewhat helpful	Fair	A Page
R_pEJ4ONfnfro3jwd	Student	M	FALSE	34	4-6	0	FALSE	TRUE	TRUE	TRUE	5				A Page	0.25		0.25	0.25	0.25		1
R_pEJ4ONfnfro3jwd	Student	M	FALSE	34	4-6	0	FALSE	TRUE	TRUE	TRUE	5				Multiple Pages	0.75		0.5	0.5	0.5		0.75
R_pEJ4ONfnfro3jwd	Student	M	FALSE	34	4-6	0	FALSE	TRUE	TRUE	TRUE	5				Multiple Pages	0.25		0.5	0.25	0.25		1
R_pEJ4ONfnfro3jwd	Student	M	FALSE	34	4-6	0	FALSE	TRUE	TRUE	TRUE	5				Multiple Pages	0.75		0.25	0.5	0.5		0.5
R_pEJ4ONfnfro3jwd	Student	M	FALSE	34	4-6	0	FALSE	TRUE	TRUE	TRUE	5				Multiple Pages	0.75		0.75	0.75	0.5		0.5
R_bOzRGGPartzXbnH	Assistant Professor	M	FALSE	45
R_1eDZ07Ooy5q02ME	Student	M	TRUE	45	4-6	0	TRUE	TRUE	TRUE	TRUE	3	Missed some minor points	Very helpful	Somewhat fair	Half a Page
R_XunyJbjyHIgCHzH	Student	F	FALSE	10
R_r0EgmCbUzUh4Bxv	Associate Professor	M	FALSE	15	7-9	2	FALSE	FALSE			4
R_3fVmw02IilX551q	Student	M	FALSE	55	4-6	0	TRUE	TRUE	TRUE	TRUE	4
R_2TZ8iiFuGSBv98Q	Student	M	FALSE	34
R_1DuQHQXwWpWkxjA	Student	M	TRUE	45	7-9	0	TRUE	TRUE	TRUE	TRUE	3	Probably didn't read it	Not at all	Very unfair	1-2 Paragraphs
R_xgQsTIrmAIdY7EB	Assistant Professor	M	TRUE	2	10-12	0	TRUE	TRUE	TRUE	TRUE	5	Misunderstood major points	Not at all	Unfair	1-2 Paragraphs	0.25	0.5	0.5		0		0.5
R_xgQsTIrmAIdY7EB	Assistant Professor	M	TRUE	2	10-12	0	TRUE	TRUE	TRUE	TRUE	5	Missed some minor points	Not at all	Somewhat fair	Half a Page	0	0.25	1		0.25		0.5
R_xgQsTIrmAIdY7EB	Assistant Professor	M	TRUE	2	10-12	0	TRUE	TRUE	TRUE	TRUE	5	Missed some minor points	Somewhat helpful	Fair	Half a Page	0.75	0.75	0.75		0.25		0.75
R_xgQsTIrmAIdY7EB	Assistant Professor	M	TRUE	2	10-12	0	TRUE	TRUE	TRUE	TRUE	5	Perfectly	Not at all	Fair	1-2 Paragraphs	1	1	1		0.5		1
R_xgQsTIrmAIdY7EB	Assistant Professor	M	TRUE	2	10-12	0	TRUE	TRUE	TRUE	TRUE	5	Perfectly	Not at all	Fair	1-2 Paragraphs	0.75	0.5	0.5		0.5		0.75
R_1KrmLVaSVb6VwvV	Associate Professor	M	FALSE	2	>12	1	FALSE	TRUE	TRUE	FALSE	5
R_1IinYTSUINgE0TQ	Industry Researcher	M	FALSE	21	10-12	0	FALSE	FALSE			4
R_BDHJUiOsPflnMxH	Student		TRUE	40			TRUE
R_2qkG99DDlRYQrbP	Student	M	TRUE	19			TRUE
R_1DZrDTHOxJsj108	Professor	M	FALSE	44	4-6	0	FALSE	TRUE	FALSE	FALSE	3
R_1DG4WHF1GgvVoGE	Professor	M	TRUE	6	10-12	0	TRUE	TRUE	TRUE	TRUE	5
R_1LpPFXq9vuHvxSs	Assistant Professor	M	FALSE	53	4-6	0	TRUE	TRUE	TRUE	TRUE	4
R_3HTAsvShLMjSesk	Student	M	FALSE	31	>12	2	FALSE	TRUE	TRUE	FALSE	5	Perfectly	Somewhat helpful	Fair	Half a Page	0.5						0.25
R_3HTAsvShLMjSesk	Student	M	FALSE	31	>12	2	FALSE	TRUE	TRUE	FALSE	5	Perfectly	Somewhat helpful	Fair	Half a Page	0.5						0.25
R_3HTAsvShLMjSesk	Student	M	FALSE	31	>12	2	FALSE	TRUE	TRUE	FALSE	5	Perfectly	Somewhat helpful	Fair	1-2 Paragraphs	0.5						0.5
R_3HTAsvShLMjSesk	Student	M	FALSE	31	>12	2	FALSE	TRUE	TRUE	FALSE	5	Missed some minor points	Somewhat helpful	Fair	1-2 Paragraphs	0.75						0.25
R_3HTAsvShLMjSesk	Student	M	FALSE	31	>12	2	FALSE	TRUE	TRUE	FALSE	5	Missed some minor points	Somewhat helpful	Fair	Half a Page	0.5						0.25
R_2qgd2CSQxxPzCVl	Professor		FALSE	45
R_1nT3UvYCnWUtXr4	Assistant Professor	M	TRUE	4			TRUE
R_2BfjK1nyXGaBhar	Associate Professor	M	FALSE	6	7-9	0	FALSE	TRUE	TRUE	TRUE	4
R_1FICTv0bXBXROuf	Associate Professor	M	FALSE	47
R_3n7NEDPH7WygVEb	Industry Researcher	F	TRUE	8	7-9	0	TRUE	TRUE	TRUE	TRUE	4	Perfectly	Somewhat helpful	Fair	Half a Page
R_RWaiw2ugX1PlMqJ	Assistant Professor	M	FALSE	15	7-9	0	FALSE	FALSE			4	Missed some minor points	Very helpful	Fair	A Page
R_RWaiw2ugX1PlMqJ	Assistant Professor	M	FALSE	16	7-9	0	TRUE	FALSE			4	Missed some minor points	Somewhat helpful	Fair	A Page	0.5						0.666667
R_RWaiw2ugX1PlMqJ	Assistant Professor	M	FALSE	16	7-9	0	TRUE	FALSE			4	Perfectly	Somewhat helpful	Fair	Multiple Pages	0.75						0.666667
R_RWaiw2ugX1PlMqJ	Assistant Professor	M	FALSE	16	7-9	0	TRUE	FALSE			4	Perfectly	Very helpful	Fair	Multiple Pages	0.25						0.333333
R_RWaiw2ugX1PlMqJ	Assistant Professor	M	FALSE	16	7-9	0	TRUE	FALSE			4	Perfectly	Somewhat helpful	Fair	A Page	0.25						0.333333
R_29lYCEJdZ0h4URQ	Student	Other	FALSE	53	10-12	1	FALSE	TRUE	TRUE	TRUE	4	Missed some minor points	Somewhat helpful	Somewhat fair	A Page	1	0.666667	0.666667	1	1	1	0.666667
R_29lYCEJdZ0h4URQ	Student	Other	FALSE	53	10-12	1	FALSE	TRUE	TRUE	TRUE	4	Missed some minor points	Somewhat helpful	Somewhat fair	Multiple Pages	0.666667	0.666667	0.333333	0.333333	1	1	0.666667
R_29lYCEJdZ0h4URQ	Student	Other	FALSE	53	10-12	1	FALSE	TRUE	TRUE	TRUE	4	Misunderstood major points	Not at all	Unfair	A Page	0.333333	1	0.666667	0.333333	0	0.666667	0.666667
R_29lYCEJdZ0h4URQ	Student	Other	FALSE	53	10-12	1	FALSE	TRUE	TRUE	TRUE	4	Perfectly	Very helpful	Fair	A Page	1	0.666667	0.666667	0.666667	0.666667	0.666667	0.666667
R_30q1ungSmd3xE36				34
R_1QDSKUQaJRyQaRO				43
R_uwWhEqWTNrVqEQ9	Other	M	FALSE	32	4-6	0	FALSE	FALSE			3	Missed some minor points	Somewhat helpful	Fair	A Page	0.5
R_uwWhEqWTNrVqEQ9	Other	M	FALSE	32	4-6	0	FALSE	FALSE			3	Missed some minor points	Somewhat helpful	Fair	Half a Page	0.5
R_uwWhEqWTNrVqEQ9	Other	M	FALSE	32	4-6	0	FALSE	FALSE			3	Missed some minor points	Somewhat helpful	Fair	Multiple Pages	0.5
R_XMxEwMaYq2Jc7eN	Government Researcher	M	FALSE	23	10-12	0	FALSE	FALSE			4	Perfectly	Not at all	Fair	1-2 Paragraphs	0.833333
R_XMxEwMaYq2Jc7eN	Government Researcher	M	FALSE	23	10-12	0	FALSE	FALSE			4	Perfectly	Very helpful	Fair	A Page	1
R_XMxEwMaYq2Jc7eN	Government Researcher	M	FALSE	23	10-12	0	FALSE	FALSE			4	Perfectly	Very helpful	Fair	Half a Page	1
R_XMxEwMaYq2Jc7eN	Government Researcher	M	FALSE	23	10-12	0	FALSE	FALSE			4	Perfectly	Very helpful	Fair	Half a Page	1
R_XMxEwMaYq2Jc7eN	Government Researcher	M	FALSE	1	>12	1	FALSE	FALSE			4	Perfectly	Not at all	Fair	1-2 Paragraphs	0.833333
R_XMxEwMaYq2Jc7eN	Government Researcher	M	FALSE	1	>12	1	FALSE	FALSE			4	Missed some minor points	Somewhat helpful	Fair	1-2 Paragraphs	0.833333
R_XMxEwMaYq2Jc7eN	Government Researcher	M	FALSE	1	>12	1	FALSE	FALSE			4	Missed some minor points	Somewhat helpful	Fair	1-2 Paragraphs	0.666667
R_XMxEwMaYq2Jc7eN	Government Researcher	M	FALSE	1	>12	1	FALSE	FALSE			4	Perfectly	Somewhat helpful	Fair	1-2 Paragraphs	0.833333
R_2xDUBPSNoSVfkgC				55
R_2z5X5krHkvqiDWF	Professor		TRUE	25	>12	1	TRUE	TRUE	TRUE	TRUE	3
R_Dphao4edOCcV68x	Industry Researcher	M	FALSE	49	>12	1	FALSE	TRUE	TRUE	TRUE	6+
R_3fPn3uJV2SKLgfN	Student	M	FALSE	1	1-3	0	FALSE	FALSE			4	Missed some minor points	Somewhat helpful	Somewhat fair	1-2 Paragraphs	0.666667	0.666667	0.666667	0.666667	0.666667	0.666667	0.666667
R_3fPn3uJV2SKLgfN	Student	M	FALSE	1	1-3	0	FALSE	FALSE			4	Probably didn't read it	Not at all	Somewhat fair	1-2 Paragraphs	0.666667	1	1	1	1	1	1
R_3fPn3uJV2SKLgfN	Student	M	FALSE	1	1-3	0	FALSE	FALSE			4	Missed some minor points	Somewhat helpful	Fair	Half a Page	0.333333	0.333333	0.333333	0.666667	0.666667	1	1
R_3fPn3uJV2SKLgfN	Student	M	FALSE	1	1-3	0	FALSE	FALSE			4	Missed some minor points	Somewhat helpful	Fair	Half a Page	0.666667	0.666667	0.666667	0.666667	0.666667	0.666667	1
R_3fPn3uJV2SKLgfN	Student	M	FALSE	30	4-6	1	FALSE	TRUE	TRUE	TRUE	4	Missed some minor points	Very helpful	Fair	A Page	0.75	0.5	0.5	0.5	0.5	0.5	0.25
R_3fPn3uJV2SKLgfN	Student	M	FALSE	30	4-6	1	FALSE	TRUE	TRUE	TRUE	4	Missed some minor points	Very helpful	Fair	A Page	0.5	0.75	0.75	0.75	0.5	1	0.5
R_3fPn3uJV2SKLgfN	Student	M	FALSE	30	4-6	1	FALSE	TRUE	TRUE	TRUE	4	Missed some minor points	Somewhat helpful	Somewhat fair	Half a Page	0.25	0.25	0.5	0.25	0.5	0.75	0.75
R_3fPn3uJV2SKLgfN	Student	M	FALSE	30	4-6	1	FALSE	TRUE	TRUE	TRUE	4	Missed some minor points	Very helpful	Fair	Multiple Pages	0.75	0.75	0.75	0.75	0.5	1	0.5
R_2YPblYvL64ElghK	Government Researcher	M	TRUE	42	7-9	1	TRUE	TRUE	TRUE	TRUE	4	Missed some minor points	Somewhat helpful	Fair	Half a Page
R_1M0zYFGsXDXvVd8	Student	M	FALSE	35	4-6	0	FALSE	TRUE	TRUE	TRUE	3	Missed some minor points	Somewhat helpful	Somewhat fair	Half a Page
R_3qPB2dmgGzHN9hV	Associate Professor	M	FALSE	55	>12	0	FALSE	TRUE	TRUE	TRUE	4
R_3GdFesDFcXoYxHC	Assistant Professor	M	TRUE	43	>12	0	TRUE	FALSE			6+
R_3GdFesDFcXoYxHC	Assistant Professor	M	TRUE	49	10-12	0	TRUE	FALSE			6+
R_3GdFesDFcXoYxHC	Assistant Professor	M	TRUE	49	4-6	0	TRUE	FALSE			6+
R_6mmwwBfWHquycbT	Government Researcher	M	FALSE	21	1-3	0	TRUE	TRUE	TRUE	TRUE	4
R_1pL1trQ3T08Xb0q	Student	M	FALSE	26	10-12	0	FALSE	TRUE	TRUE	TRUE	6+	Perfectly	Somewhat helpful	Fair	A Page
R_1IHp54iwWIAsnZV	Government Researcher	M	FALSE	39	1-3	0	FALSE	TRUE	TRUE	FALSE	5	Missed some minor points	Somewhat helpful	Fair	A Page
R_33fK5dZJWDf84aR	Assistant Professor	M	FALSE	18	>12	1	FALSE	TRUE	TRUE	FALSE	3	Missed some minor points	Not at all	Somewhat fair	Half a Page	0.75	0.75	0.75	0.75	1	1	0.5
R_33fK5dZJWDf84aR	Assistant Professor	M	FALSE	18	>12	1	FALSE	TRUE	TRUE	FALSE	3	Missed some minor points	Very helpful	Fair	Multiple Pages	0.75	0.75	0.75	0.75	0.75	1	0.5
R_33fK5dZJWDf84aR	Assistant Professor	M	FALSE	18	>12	1	FALSE	TRUE	TRUE	FALSE	3	Misunderstood major points	Somewhat helpful	Somewhat fair	A Page	0.5	0.75	0.75	0.75	0.5	1	0.5
R_2AG7CLMUvMWkkr8	Student	M	FALSE	30	10-12	0	TRUE	TRUE	TRUE	TRUE	5
R_2YroEr7J2vUGfXm	Industry Researcher	M	FALSE	33	1-3	0	FALSE	FALSE			3	Missed some minor points	Somewhat helpful	Fair	Half a Page	0.5	0.5	0.25	0.5	0.5		0.25
R_2YroEr7J2vUGfXm	Industry Researcher	M	FALSE	33	1-3	0	FALSE	FALSE			3	Missed some minor points	Somewhat helpful	Fair	Half a Page	0.75	0.5	0.5	0.5	0.25		0.25
R_2YroEr7J2vUGfXm	Industry Researcher	M	FALSE	33	1-3	0	FALSE	FALSE			3	Missed some minor points	Somewhat helpful	Fair	A Page	0.75	0.25	0.25	0.5	0.5		0.25
R_3FOMobRA3fN63ET	Postdoctoral Researcher	M	TRUE	7	>12	0	TRUE	FALSE			3	Missed some minor points	Not at all	Somewhat fair	Half a Page	0.75						0.333333
R_3FOMobRA3fN63ET	Postdoctoral Researcher	M	TRUE	7	>12	0	TRUE	FALSE			3	Missed some minor points	Not at all	Fair	Half a Page	0.5						0.333333
R_3FOMobRA3fN63ET	Postdoctoral Researcher	M	TRUE	7	>12	0	TRUE	FALSE			3	Missed some minor points	Somewhat helpful	Fair	Half a Page	0.25						0.666667
R_24cuf20Zq2IzTne	Professor	F	FALSE	11	10-12	0	FALSE	TRUE	TRUE	FALSE	4	Missed some minor points	Somewhat helpful	Somewhat fair	1-2 Paragraphs
R_24cuf20Zq2IzTne	Professor	F	FALSE	11	10-12	0	FALSE	TRUE	TRUE	FALSE	4	Perfectly	Somewhat helpful	Somewhat fair	1-2 Paragraphs
R_24cuf20Zq2IzTne	Professor	F	FALSE	11	10-12	0	FALSE	TRUE	TRUE	FALSE	4	Missed some minor points	Somewhat helpful	Somewhat fair	1-2 Paragraphs
R_24cuf20Zq2IzTne	Professor	F	FALSE	11	10-12	0	FALSE	TRUE	TRUE	FALSE	4
R_33qlhrYXoEXueLY	Industry Researcher	M	TRUE	14	>12	0	TRUE	TRUE	TRUE	TRUE	5	Missed some minor points	Very helpful	Fair	Half a Page
R_33qlhrYXoEXueLY	Industry Researcher	M	TRUE	34	>12	0	TRUE	TRUE	TRUE	TRUE	5
R_3CPgHdJlQxbOodw	Student	M	FALSE	2	7-9	3	FALSE	TRUE	TRUE	TRUE	5	Missed some minor points	Not at all	Fair	Half a Page
R_3CPgHdJlQxbOodw	Student	M	FALSE	46	4-6	2	TRUE	TRUE	TRUE	TRUE	3
R_rqGF5kKI1EFduHn	Student	M	FALSE	7	10-12	1	TRUE	FALSE			3	Missed some minor points	Not at all	Somewhat fair	1-2 Paragraphs
R_vJ15wCzKpoZWsUx	Student	M	FALSE	12	4-6	0	FALSE	FALSE			4	Perfectly	Very helpful	Fair	A Page	1	0.777778	0.777778	0.777778	0.888889	0.888889	0.777778
R_vJ15wCzKpoZWsUx	Student	M	FALSE	12	4-6	0	FALSE	FALSE			4	Missed some minor points	Somewhat helpful	Somewhat fair	A Page	0.333333	0.666667	0.666667	0.666667	0.555556	0.777778	0.777778
R_vJ15wCzKpoZWsUx	Student	M	FALSE	12	4-6	0	FALSE	FALSE			4	Perfectly	Very helpful	Fair	A Page	0.666667	0.777778	0.888889	0.777778	0.888889	0.888889	0.777778
R_vJ15wCzKpoZWsUx	Student	M	FALSE	12	4-6	0	FALSE	FALSE			4	Perfectly	Very helpful	Fair	A Page	0.666667	0.777778	0.888889	0.666667	0.888889	0.777778	0.888889
R_3JyYhUfSop1NbPU	Associate Professor	M	FALSE	45	4-6	0	FALSE	FALSE			3	Missed some minor points	Not at all	Somewhat fair	1-2 Paragraphs
R_DvPonmeLgZiYFeV	Professor		TRUE	31	10-12	0	TRUE	TRUE	TRUE	TRUE	5
R_DvPonmeLgZiYFeV	Professor		TRUE	34	10-12	0	TRUE	TRUE	TRUE	TRUE	5
R_DvPonmeLgZiYFeV	Professor		TRUE	34	7-9	1	TRUE	TRUE	TRUE	TRUE	5
R_2Bsabo9oNPQTkCx	Student	F	FALSE	7	7-9	0	TRUE	FALSE			3	Perfectly	Very helpful	Fair	1-2 Paragraphs
R_3lQQZzKEqKZBasW	Industry Researcher		TRUE	48	1-3	0	TRUE	FALSE			4
R_2DYPpufVGxS00iv	Professor	M	FALSE	14
R_1gNIhmLqyPS3Kdy	Student	M	FALSE	50	10-12	0	FALSE	TRUE	TRUE	TRUE	6+	Missed some minor points	Somewhat helpful	Fair	Half a Page
R_1gNIhmLqyPS3Kdy	Student	M	FALSE	23	10-12	0	FALSE	FALSE			4	Missed some minor points	Very helpful	Fair	Multiple Pages
R_yKnv43u4FET8BdT	Other	M	FALSE	45	>12	0	TRUE	TRUE	TRUE	TRUE	4	Missed some minor points	Somewhat helpful	Somewhat fair	Half a Page	0.666667	0.666667	0.666667	0.666667	0.666667	0.666667	0.666667
R_yKnv43u4FET8BdT	Other	M	FALSE	45	>12	0	TRUE	TRUE	TRUE	TRUE	4	Missed some minor points	Very helpful	Somewhat fair	A Page	0.666667	0.666667	0.666667	0.666667	0.666667	0.666667	0.666667
R_yKnv43u4FET8BdT	Other	M	FALSE	45	>12	0	TRUE	TRUE	TRUE	TRUE	4	Missed some minor points	Somewhat helpful	Somewhat fair	A Page	0.666667	0.666667	0.666667	0.666667	0.666667	0.666667	0.666667
R_A0RQv9HzMCOUqbL	Student	M	FALSE	53	4-6	0	FALSE	TRUE	TRUE	TRUE	3	Perfectly	Very helpful	Fair	A Page	0.75	1	1	1	1	1	1
R_A0RQv9HzMCOUqbL	Student	M	FALSE	53	4-6	0	FALSE	TRUE	TRUE	TRUE	3	Perfectly	Very helpful	Fair	Multiple Pages	0.75	1	1	1	1	1	0.333333
R_A0RQv9HzMCOUqbL	Student	M	FALSE	53	4-6	0	FALSE	TRUE	TRUE	TRUE	3	Perfectly	Very helpful	Fair	Multiple Pages	1	1	1	1	1	1	1
R_2ctNyS5NM9z1Ewl	Assistant Professor		TRUE	21			TRUE
R_2V86mI586DadieC	Industry Researcher	M	FALSE	22	7-9	0	FALSE	FALSE			5
R_24Nmp0HRk2NWRBT	Industry Researcher		FALSE	38	>12	0	TRUE	FALSE			5
R_1DY061wRKm3BPw0				44
R_291eVSYDsY1WYjX	Student	M	FALSE	18	4-6	0	FALSE	TRUE	TRUE	TRUE	3	Missed some minor points	Somewhat helpful	Fair	A Page	0	0.666667	0.666667		0.666667		0.666667
R_291eVSYDsY1WYjX	Student	M	FALSE	18	4-6	0	FALSE	TRUE	TRUE	TRUE	3	Missed some minor points	Very helpful	Fair	Half a Page	0	0.333333	0.333333		0.666667		0.666667
R_291eVSYDsY1WYjX	Student	M	FALSE	18	4-6	0	FALSE	TRUE	TRUE	TRUE	3	Perfectly	Very helpful	Fair	A Page	0.333333	0.666667	0.333333		1		0.333333
R_3lERhzEX8EIG9Ye	Associate Professor	F	FALSE	46	>12	1	FALSE	TRUE	TRUE	TRUE	3
R_3lERhzEX8EIG9Ye	Associate Professor	F	FALSE	19	10-12	0	TRUE	TRUE	TRUE	TRUE	4
R_2yqHQkZQr9cTf7t	Postdoctoral Researcher	M	FALSE	11	4-6	0	FALSE	TRUE	TRUE	TRUE	3	Perfectly	Very helpful	Fair	1-2 Paragraphs	1	1	1	1	1	1	1
R_2yqHQkZQr9cTf7t	Postdoctoral Researcher	M	FALSE	11	4-6	0	FALSE	TRUE	TRUE	TRUE	3	Perfectly	Somewhat helpful	Fair	Half a Page	1	1	1	1	1	1	1
R_2yqHQkZQr9cTf7t	Postdoctoral Researcher	M	FALSE	11	4-6	0	FALSE	TRUE	TRUE	TRUE	3	Perfectly	Very helpful	Fair	A Page	1	1	1	1	1	1	1
R_1NwTT3d3PvOob2x	Student	M	FALSE	11	1-3	0	FALSE	FALSE			3	Missed some minor points	Somewhat helpful	Fair	A Page
R_ylN0xUX6di0qyjf	Postdoctoral Researcher	M	FALSE	10	7-9	0	TRUE	TRUE	FALSE	TRUE	4	Missed some minor points	Somewhat helpful	Somewhat fair	Half a Page
R_3qmz6fSzXyz0XQf	Student	M	FALSE	49
R_qWt8UeyYWwgy43D	Assistant Professor		FALSE	53
R_poraEdu0NYbv7Z7	Government Researcher	M	TRUE	1	1-3	0	TRUE	FALSE			4	Missed some minor points	Not at all	Somewhat fair	1-2 Paragraphs
R_1Qo7OezMs9FdMuq	Assistant Professor	M	FALSE	31	4-6	0	TRUE	TRUE	TRUE	TRUE	6+	Missed some minor points	Very helpful	Fair	A Page
R_1Qo7OezMs9FdMuq	Assistant Professor	M	FALSE	30	7-9	0	FALSE	TRUE	TRUE	TRUE	5	Perfectly	Very helpful	Fair	Multiple Pages
R_240rhAyV05SfKaW	Government Researcher	M	FALSE	39	>12	1	TRUE	TRUE	TRUE	TRUE	5	Perfectly	Very helpful	Fair	A Page
R_240rhAyV05SfKaW	Government Researcher	M	FALSE	39	>12	0	TRUE	TRUE	TRUE	TRUE	5	Perfectly	Very helpful	Fair	Multiple Pages
R_240rhAyV05SfKaW	Government Researcher	M	FALSE	30	>12	0	TRUE	TRUE	TRUE	TRUE	5	Perfectly	Very helpful	Fair	Multiple Pages
R_DTx25B1M0enOMTL	Professor	M	TRUE	39	1-3	3	TRUE	FALSE			5
R_dclh2GHRZNV5zfH	Postdoctoral Researcher	M	FALSE	49	>12	3	TRUE	FALSE			6+	Missed some minor points	Somewhat helpful	Fair	A Page
R_2znYgceMq15lh5g	Student	M	TRUE	27	>12	1	TRUE	FALSE			6+
R_YaHUFK677kX3PC9				13
R_3plhRXWuzyap0Vx	Associate Professor		TRUE	27			TRUE
R_2pKVSBNRRzQbIIr				21
R_3CWrWTeXBpJu0CM	Student	F	FALSE	40	10-12	5	TRUE	FALSE			3
R_2ano5CGk0E5c2tV	Student	M	FALSE	31	4-6	0	FALSE	TRUE	TRUE	TRUE	4	Misunderstood major points	Somewhat helpful	Fair	Half a Page
R_2QsVykXxATb2nLV	Assistant Professor	M	FALSE	5	10-12	1	FALSE	TRUE	TRUE	TRUE	5	Perfectly	Very helpful	Fair	Multiple Pages	0.333333
R_2QsVykXxATb2nLV	Assistant Professor	M	FALSE	5	10-12	1	FALSE	TRUE	TRUE	TRUE	5	Misunderstood major points	Somewhat helpful	Unfair	A Page	0.333333
R_2QsVykXxATb2nLV	Assistant Professor	M	FALSE	5	10-12	1	FALSE	TRUE	TRUE	TRUE	5	Perfectly	Very helpful	Fair	A Page	0.666667
R_2QsVykXxATb2nLV	Assistant Professor	M	FALSE	5	10-12	1	FALSE	TRUE	TRUE	TRUE	5	Perfectly	Very helpful	Fair	Multiple Pages	0.333333
R_2QsVykXxATb2nLV	Assistant Professor	M	FALSE	5	10-12	1	FALSE	TRUE	TRUE	TRUE	5	Perfectly	Very helpful	Fair	Multiple Pages	0.333333
R_1cYsuYOk8uRiAQM	Student	M	FALSE	48	4-6	0	FALSE	FALSE			3	Perfectly	Somewhat helpful	Fair	Half a Page
R_OcZQAEM2Ykcwqfn	Student	M	FALSE	51	7-9	0	TRUE	FALSE			3	Missed some minor points	Somewhat helpful	Fair	A Page
R_10wm6TMXXeaQlEu	Student	M	FALSE	27	10-12	2	TRUE	FALSE			5	Missed some minor points	Very helpful	Fair	Multiple Pages	0.5
R_10wm6TMXXeaQlEu	Student	M	FALSE	27	10-12	2	TRUE	FALSE			5	Perfectly	Very helpful	Fair	Multiple Pages	0.75
R_10wm6TMXXeaQlEu	Student	M	FALSE	27	10-12	2	TRUE	FALSE			5	Missed some minor points	Very helpful	Somewhat fair	Multiple Pages	0.25
R_10wm6TMXXeaQlEu	Student	M	FALSE	27	10-12	2	TRUE	FALSE			5	Misunderstood major points	Somewhat helpful	Somewhat fair	Multiple Pages	0.25
R_10wm6TMXXeaQlEu	Student	M	FALSE	27	10-12	2	TRUE	FALSE			5	Perfectly	Very helpful	Fair	Multiple Pages	0.5
R_xfSyw1iHgzQ5MPf	Professor	M	TRUE	37	>12	2	TRUE	FALSE			4	Missed some minor points	Somewhat helpful	Somewhat fair	Half a Page
R_3no1fN5eIGi9LJd	Postdoctoral Researcher	F	TRUE	11			TRUE
R_2fxuRfsNqipxcDz	Student	F	FALSE	33	>12	0	FALSE	TRUE	TRUE	TRUE	5	Perfectly	Very helpful	Fair	A Page
R_2vl9ndyrG2agEkN	Assistant Professor	M	FALSE	31	7-9	1	TRUE	FALSE			4
R_1hYmbORYxHbaZHc	Assistant Professor	F	TRUE	31	>12	2	TRUE	TRUE	TRUE	TRUE	5
R_1jdqHVBjYYkiTZD	Professor	M	TRUE	18	7-9	0	TRUE	TRUE	TRUE	TRUE	3
R_25H1jFXG1CK9hP5				50
R_3Gj0cMkXoc2wXnB	Assistant Professor	M	FALSE	40	4-6	0	FALSE	FALSE			3
R_2EF6VHlGgTc37pA	Professor	M	FALSE	47
R_RrV5OC4U70ZXvK9	Student	M	TRUE	11	7-9	0	TRUE	FALSE			4	Misunderstood major points	Not at all	Unfair	Half a Page	0.75		0.5		0.75
R_RrV5OC4U70ZXvK9	Student	M	TRUE	11	7-9	0	TRUE	FALSE			4	Perfectly	Not at all	Fair	1-2 Paragraphs	0.5		1		1
R_RrV5OC4U70ZXvK9	Student	M	TRUE	11	7-9	0	TRUE	FALSE			4	Missed some minor points	Not at all	Somewhat fair	1-2 Paragraphs	0.5		0.75		0.75
R_RrV5OC4U70ZXvK9	Student	M	TRUE	11	7-9	0	TRUE	FALSE			4	Missed some minor points	Somewhat helpful	Somewhat fair	1-2 Paragraphs	0.5		0.75		0.75
R_1l9tBTaz8OJ9MTH	Postdoctoral Researcher	M	TRUE	4	7-9	0	TRUE	FALSE			3	Perfectly	Somewhat helpful	Fair	Half a Page	0.5
R_1l9tBTaz8OJ9MTH	Postdoctoral Researcher	M	TRUE	4	7-9	0	TRUE	FALSE			3	Perfectly	Somewhat helpful	Fair	Half a Page	1
R_1l9tBTaz8OJ9MTH	Postdoctoral Researcher	M	TRUE	4	7-9	0	TRUE	FALSE			3	Missed some minor points	Not at all	Fair	1-2 Paragraphs	0.5
R_1guAkTVQ7dUSkja	Professor	M	TRUE	13			TRUE
R_xtFrryemscNARJT	Industry Researcher	F	FALSE	19	4-6	0	TRUE	TRUE	TRUE	TRUE	4
R_XoGPsjYHA92qAtr	Professor	M	FALSE	18	>12	5	FALSE	TRUE	TRUE	TRUE	3	Missed some minor points	Somewhat helpful	Fair	A Page	0.5	1	1	0.5
R_XoGPsjYHA92qAtr	Professor	M	FALSE	18	>12	5	FALSE	TRUE	TRUE	TRUE	3	Missed some minor points	Not at all	Somewhat fair	Half a Page	0	0.5	0	0.5	0.5
R_XoGPsjYHA92qAtr	Professor	M	FALSE	18	>12	5	FALSE	TRUE	TRUE	TRUE	3	Missed some minor points	Somewhat helpful	Somewhat fair	A Page	0.5	1	1	0.5	0.5
R_XoGPsjYHA92qAtr	Professor	M	FALSE	16	4-6	1	FALSE	FALSE			4	Perfectly	Somewhat helpful	Somewhat fair	A Page	0.5	0.75	0.75	0.75	0.5	0.75	0.5
R_XoGPsjYHA92qAtr	Professor	M	FALSE	16	4-6	1	FALSE	FALSE			4	Perfectly	Somewhat helpful	Somewhat fair	Half a Page	0.75	1	1	1	0.75	1	0.25
R_XoGPsjYHA92qAtr	Professor	M	FALSE	16	4-6	1	FALSE	FALSE			4	Perfectly	Not at all	Somewhat fair	Half a Page	0.75	1	1	1	0.75	0.75	0.25
R_XoGPsjYHA92qAtr	Professor	M	FALSE	16	4-6	1	FALSE	FALSE			4	Perfectly	Somewhat helpful	Fair	A Page	1	0.75	1	1	1	1	1
R_XoGPsjYHA92qAtr	Professor	M	FALSE	16	10-12	1	FALSE	FALSE			4	Missed some minor points	Somewhat helpful	Somewhat fair	Half a Page	0	0					0.25
R_XoGPsjYHA92qAtr	Professor	M	FALSE	16	10-12	1	FALSE	FALSE			4	Misunderstood major points	Not at all	Somewhat fair	Half a Page	0				0.75
R_XoGPsjYHA92qAtr	Professor	M	FALSE	16	10-12	1	FALSE	FALSE			4	Missed some minor points	Not at all	Somewhat fair	Half a Page	0		0.5	0.5	0.75		0
R_XoGPsjYHA92qAtr	Professor	M	FALSE	16	10-12	1	FALSE	FALSE			4	Perfectly	Somewhat helpful	Fair	Half a Page	1	1	1	1	1		0.25
R_1LLGknbjLr97W9X	Student	M	FALSE	30	1-3	0	FALSE	TRUE	TRUE	TRUE	4	Perfectly	Very helpful	Fair	Multiple Pages	1	1	1	0.75	0.75	1	1
R_1LLGknbjLr97W9X	Student	M	FALSE	30	1-3	0	FALSE	TRUE	TRUE	TRUE	4	Perfectly	Not at all	Fair	Half a Page	0.75	1	0.75	0.5	0.5	1	0.5
R_1LLGknbjLr97W9X	Student	M	FALSE	30	1-3	0	FALSE	TRUE	TRUE	TRUE	4	Missed some minor points	Somewhat helpful	Somewhat fair	Half a Page	0.5	0.5	0.75	0.5	0.5	0.75	0.75
R_1LLGknbjLr97W9X	Student	M	FALSE	30	1-3	0	FALSE	TRUE	TRUE	TRUE	4	Perfectly	Somewhat helpful	Fair	A Page	0.5	0.75	0.5	0.5	0.75	0.75	0.5
R_0IoG7Y6spyb7Txf	Student	M	TRUE	30	10-12	1	TRUE	TRUE	TRUE	TRUE	3	Perfectly	Very helpful	Fair	Half a Page
R_1cRPtWhQ4PWDUUX	Student	M	FALSE	2	10-12	2	TRUE	TRUE	TRUE	TRUE	5
R_9u8TQSlhIbEDXJD	Assistant Professor	M	TRUE	34	7-9	2	TRUE	TRUE	TRUE	TRUE	5
R_11j7TJmDZcYXvcm	Professor	M	FALSE	19	10-12	0	TRUE	TRUE	TRUE	FALSE	2
R_2QoGbXe2EV7V27L	Postdoctoral Researcher	M	TRUE	34			TRUE
R_2drInWAV5posPJr	Associate Professor	M	FALSE	35	10-12	0	FALSE	TRUE	TRUE	TRUE	5
R_3prpinRxEUfzbAs	Student	M	FALSE	14	10-12	0	TRUE	TRUE	TRUE	TRUE	6+
R_22uamTesWYZpiVg	Student	M	FALSE	26	>12	0	FALSE	TRUE	TRUE	TRUE	6+	Missed some minor points	Somewhat helpful	Fair	A Page
R_ufG6ODFPXNo9xex	Industry Researcher	M	FALSE	49	4-6	0	TRUE	TRUE	TRUE	TRUE	6+	Missed some minor points	Very helpful	Fair	Half a Page
R_3CT1s3hDOlUwSk2	Associate Professor	M	TRUE	11			TRUE
R_1P4NaupbgGd3LvG	Industry Researcher	M	TRUE	38	4-6	0	TRUE	FALSE			5	Perfectly	Somewhat helpful	Fair	Half a Page	0.75		0.5		0.5		0.75
R_1P4NaupbgGd3LvG	Industry Researcher	M	TRUE	38	4-6	0	TRUE	FALSE			5	Missed some minor points	Somewhat helpful	Somewhat fair	1-2 Paragraphs	1		1		0.25		0.25
R_1P4NaupbgGd3LvG	Industry Researcher	M	TRUE	38	4-6	0	TRUE	FALSE			5	Perfectly	Somewhat helpful	Fair	Half a Page	0.75		0.75		0.5		0.5
R_1P4NaupbgGd3LvG	Industry Researcher	M	TRUE	38	4-6	0	TRUE	FALSE			5	Perfectly	Somewhat helpful	Fair	1-2 Paragraphs	0.75		0.75		0.25		0.25
R_1P4NaupbgGd3LvG	Industry Researcher	M	TRUE	38	4-6	0	TRUE	FALSE			5	Perfectly	Not at all	Fair	1-2 Paragraphs	1		0.5		0.5		0.5
R_1P4NaupbgGd3LvG	Industry Researcher	M	TRUE	38	4-6	0	TRUE	FALSE			5				Half a Page	1		0.75		0.5		0.75
R_1P4NaupbgGd3LvG	Industry Researcher	M	TRUE	38	4-6	0	TRUE	FALSE			5	Missed some minor points	Very helpful	Somewhat fair	Half a Page	0.5		0.25		0.25		0.5
R_1P4NaupbgGd3LvG	Industry Researcher	M	TRUE	38	4-6	0	TRUE	FALSE			5	Perfectly	Very helpful	Fair	A Page	1		0.75		0.5		0.75
R_1P4NaupbgGd3LvG	Industry Researcher	M	TRUE	38	4-6	0	TRUE	FALSE			5	Perfectly	Somewhat helpful	Fair	A Page	0.75		0.75		0.5		0.75
R_1P4NaupbgGd3LvG	Industry Researcher	M	TRUE	38	4-6	0	TRUE	FALSE			5	Perfectly	Somewhat helpful	Fair	A Page	0.75		0.5		0.25		0.75
R_1P4NaupbgGd3LvG	Industry Researcher	M	TRUE	47	4-6	2	TRUE	FALSE			4					0.5
R_1P4NaupbgGd3LvG	Industry Researcher	M	TRUE	47	4-6	2	TRUE	FALSE			4					0.833333
R_1P4NaupbgGd3LvG	Industry Researcher	M	TRUE	47	4-6	2	TRUE	FALSE			4					0.833333
R_1P4NaupbgGd3LvG	Industry Researcher	M	TRUE	47	4-6	2	TRUE	FALSE			4					0.833333
R_241OsQth6N9gROl	Assistant Professor	M	FALSE	53	1-3	1	FALSE	TRUE	TRUE	TRUE	4	Missed some minor points	Very helpful	Somewhat fair	A Page
R_1jNtZDO4hvNOlEF	Student	M	TRUE	49			TRUE
R_1IQtrGviSu5BEQe	Assistant Professor	M	FALSE	37	10-12	1	TRUE	FALSE			4	Perfectly	Somewhat helpful	Fair	A Page	0.75	0.5					0.666667
R_1IQtrGviSu5BEQe	Assistant Professor	M	FALSE	37	10-12	1	TRUE	FALSE			4	Missed some minor points	Not at all	Somewhat fair	Half a Page	0.75	0.75
R_1IQtrGviSu5BEQe	Assistant Professor	M	FALSE	37	10-12	1	TRUE	FALSE			4	Missed some minor points	Somewhat helpful	Somewhat fair	A Page	0.5	0.25					0.333333
R_1IQtrGviSu5BEQe	Assistant Professor	M	FALSE	37	10-12	1	TRUE	FALSE			4	Probably didn't read it	Not at all	Somewhat fair	1-2 Paragraphs	0.5	0.75					0.666667
R_1IQtrGviSu5BEQe	Assistant Professor	M	FALSE	16	7-9	1	TRUE	FALSE			5	Misunderstood major points	Not at all	Somewhat fair	Half a Page	0.5						0.333333
R_1IQtrGviSu5BEQe	Assistant Professor	M	FALSE	16	7-9	1	TRUE	FALSE			5	Perfectly	Very helpful	Fair	A Page	0.75						0.666667
R_1IQtrGviSu5BEQe	Assistant Professor	M	FALSE	16	7-9	1	TRUE	FALSE			5	Missed some minor points	Somewhat helpful	Unfair	Half a Page	0.25						0.666667
R_1IQtrGviSu5BEQe	Assistant Professor	M	FALSE	16	7-9	1	TRUE	FALSE			5	Perfectly	Somewhat helpful	Somewhat fair	A Page	0.5						0.333333
R_1IQtrGviSu5BEQe	Assistant Professor	M	FALSE	16	7-9	1	TRUE	FALSE			5	Perfectly	Very helpful	Somewhat fair	A Page	0.75						1
R_1IQtrGviSu5BEQe	Assistant Professor	M	FALSE	28	7-9	1	TRUE	FALSE			4	Missed some minor points	Very helpful	Fair	A Page	0.333333
R_1IQtrGviSu5BEQe	Assistant Professor	M	FALSE	28	7-9	1	TRUE	FALSE			4	Misunderstood major points	Somewhat helpful	Somewhat fair	Half a Page	0.666667
R_1IQtrGviSu5BEQe	Assistant Professor	M	FALSE	28	7-9	1	TRUE	FALSE			4	Misunderstood major points	Somewhat helpful	Somewhat fair	Half a Page	0.666667
R_1IQtrGviSu5BEQe	Assistant Professor	M	FALSE	28	7-9	1	TRUE	FALSE			4	Missed some minor points	Very helpful	Fair	A Page	0.666667
R_VLtPQgQEs8LxyNj	Government Researcher	M	TRUE	15			TRUE
R_2aXohpvyNZQQGjw	Student	M	FALSE	54	>12	1	TRUE	FALSE			5	Perfectly	Very helpful	Fair	A Page	0.75						0.5
R_2aXohpvyNZQQGjw	Student	M	FALSE	54	>12	1	TRUE	FALSE			5	Perfectly	Very helpful	Fair	A Page	0.5						0.5
R_2aXohpvyNZQQGjw	Student	M	FALSE	54	>12	1	TRUE	FALSE			5	Perfectly	Very helpful	Fair	A Page	0.5						0.5
R_2aXohpvyNZQQGjw	Student	M	FALSE	54	>12	1	TRUE	FALSE			5	Perfectly	Very helpful	Fair	A Page	0.5						0.25
R_2aXohpvyNZQQGjw	Student	M	FALSE	54	>12	1	TRUE	FALSE			5	Perfectly	Very helpful	Fair	A Page	0.75						0.25
R_12rs4q4DtTco2Lu	Assistant Professor	F	FALSE	20	>12	2	FALSE	FALSE			5
R_XpiCgLc0nDtrrJT	Industry Researcher	M	TRUE	7	4-6	3	TRUE	FALSE			4	Perfectly			A Page	0.666667						1
R_XpiCgLc0nDtrrJT	Industry Researcher	M	TRUE	7	4-6	3	TRUE	FALSE			4	Missed some minor points			Half a Page	0.666667						1
R_XpiCgLc0nDtrrJT	Industry Researcher	M	TRUE	7	4-6	3	TRUE	FALSE			4	Misunderstood major points	Not at all	Somewhat fair	Half a Page	0.666667						1
R_XpiCgLc0nDtrrJT	Industry Researcher	M	TRUE	7	4-6	3	TRUE	FALSE			4	Missed some minor points	Somewhat helpful	Fair	Half a Page	0.666667						0.5
R_A6eIYOca2NPLNTP	Professor		TRUE	18	>12	3	TRUE	FALSE			4
R_2YM7NjlReo3Prg0	Student	M	FALSE	38	7-9	0	FALSE	FALSE			5
R_Xv2F9JhGDEEtT0J	Professor	M	TRUE	31			TRUE
R_YakplosjAfSRAqJ				28
R_T6JKsH1UgjvmcCt				31
R_1diVyr3tS3sjkVf				11
R_cwiX8Z9I4GLnM2J	Student	M	FALSE	19	4-6	1	FALSE	TRUE	TRUE	TRUE	4
R_3nOSzYEV22zbnlk	Student	M	FALSE	35	10-12	1	TRUE	TRUE	TRUE	TRUE	6+
R_1OGNkNHF3YFOltS	Assistant Professor	Other	TRUE	53	1-3	0	TRUE	TRUE	TRUE	FALSE	3
R_6eZVxNaqUO6wCjf	Postdoctoral Researcher	F	FALSE	11	4-6	0	TRUE	FALSE			4	Perfectly	Somewhat helpful	Fair	Half a Page
R_6eZVxNaqUO6wCjf	Postdoctoral Researcher	F	FALSE	11	4-6	0	TRUE	FALSE			4	Missed some minor points	Somewhat helpful	Somewhat fair	1-2 Paragraphs
R_6eZVxNaqUO6wCjf	Postdoctoral Researcher	F	FALSE	11	4-6	0	TRUE	FALSE			4	Perfectly	Very helpful	Fair	Half a Page
R_6eZVxNaqUO6wCjf	Postdoctoral Researcher	F	FALSE	11	4-6	0	TRUE	FALSE			4	Perfectly	Somewhat helpful	Fair	Half a Page
R_2D6zoZXmc7uFnpK	Student	M	TRUE	39	4-6	0	TRUE	TRUE	TRUE	TRUE	3	Missed some minor points	Very helpful	Fair	Half a Page
R_3JeJTJctmIVC62l	Industry Researcher	M	TRUE	53	10-12	0	TRUE	TRUE	TRUE	TRUE	3	Missed some minor points	Somewhat helpful	Fair	A Page
R_BJ2mjK6w0NnxmMx	Student	M	FALSE	30	4-6	2	TRUE	TRUE	TRUE	TRUE	4	Perfectly	Not at all	Fair	Half a Page
R_3OrbriXyFHlPLNK	Student	M	TRUE	10			TRUE
R_1DPjso41GeBzH8P	Student	M	TRUE	33	1-3	0	TRUE	FALSE			3	Missed some minor points	Somewhat helpful	Fair	Half a Page	1	0.75	0.5	0.25	0.75		0.666667
R_1DPjso41GeBzH8P	Student	M	TRUE	33	1-3	0	TRUE	FALSE			3	Missed some minor points	Somewhat helpful	Fair	Half a Page	0.75	0.5	0.5	0.5	0.25		0.333333
R_1DPjso41GeBzH8P	Student	M	TRUE	33	1-3	0	TRUE	FALSE			3	Missed some minor points	Very helpful	Fair	Half a Page	1	0.75	0.75	0.75	0.25		0.333333
R_1DPjso41GeBzH8P	Student	M	TRUE	21	7-9	3	TRUE	TRUE	TRUE	FALSE	5	Missed some minor points	Somewhat helpful	Fair	A Page	0.8						0.333333
R_1DPjso41GeBzH8P	Student	M	TRUE	21	7-9	3	TRUE	TRUE	TRUE	FALSE	5	Perfectly	Somewhat helpful	Fair	A Page	0.8						0.666667
R_1DPjso41GeBzH8P	Student	M	TRUE	21	7-9	3	TRUE	TRUE	TRUE	FALSE	5	Missed some minor points	Very helpful	Fair	A Page	0.6						0.333333
R_1DPjso41GeBzH8P	Student	M	TRUE	21	7-9	3	TRUE	TRUE	TRUE	FALSE	5	Misunderstood major points	Not at all	Fair	A Page	0.4						0.333333
R_1DPjso41GeBzH8P	Student	M	TRUE	21	7-9	3	TRUE	TRUE	TRUE	FALSE	5	Misunderstood major points	Very helpful	Fair	A Page	0.6						0.333333
R_1DPjso41GeBzH8P	Student	M	TRUE	21	1-3	0	TRUE	TRUE	FALSE	FALSE	3	Perfectly	Very helpful	Fair	A Page	1						0.333333
R_1DPjso41GeBzH8P	Student	M	TRUE	21	1-3	0	TRUE	TRUE	FALSE	FALSE	3	Missed some minor points	Very helpful	Fair	A Page	0.75						0.333333
R_1DPjso41GeBzH8P	Student	M	TRUE	21	1-3	0	TRUE	TRUE	FALSE	FALSE	3	Misunderstood major points	Very helpful	Fair	A Page	1						0.333333
R_1DPjso41GeBzH8P	Student	M	TRUE	21	1-3	0	TRUE	TRUE	FALSE	FALSE	3					0.75						0.333333
R_dpuKKaasMBiQgWR	Industry Researcher	M	TRUE	30	1-3	0	TRUE	TRUE	TRUE	TRUE	3
R_31S31jc9DsUd12F	Assistant Professor	M	FALSE	47	7-9	1	FALSE	FALSE			3	Perfectly	Not at all	Fair	1-2 Paragraphs	0.666667
R_31S31jc9DsUd12F	Assistant Professor	M	FALSE	47	7-9	1	FALSE	FALSE			3	Perfectly	Somewhat helpful	Fair	1-2 Paragraphs	0.833333
R_31S31jc9DsUd12F	Assistant Professor	M	FALSE	47	7-9	1	FALSE	FALSE			3	Perfectly	Not at all	Fair	1-2 Paragraphs	0.833333
R_31S31jc9DsUd12F	Assistant Professor	M	FALSE	47	10-12	1	FALSE	FALSE			4	Misunderstood major points	Somewhat helpful	Somewhat fair	Half a Page	0.333333
R_31S31jc9DsUd12F	Assistant Professor	M	FALSE	47	10-12	1	FALSE	FALSE			4	Missed some minor points	Not at all	Somewhat fair	1-2 Paragraphs	0.5
R_31S31jc9DsUd12F	Assistant Professor	M	FALSE	47	10-12	1	FALSE	FALSE			4	Perfectly	Somewhat helpful	Fair	A Page	0.666667
R_31S31jc9DsUd12F	Assistant Professor	M	FALSE	47	10-12	1	FALSE	FALSE			4	Probably didn't read it	Not at all	Somewhat fair	1-2 Paragraphs	0.5
R_2D8t25uNNZeUia1	Associate Professor	M	FALSE	12	4-6	0	FALSE	FALSE			6+	Perfectly	Somewhat helpful	Fair	1-2 Paragraphs	0.75						1
R_2D8t25uNNZeUia1	Associate Professor	M	FALSE	12	4-6	0	FALSE	FALSE			6+	Missed some minor points	Somewhat helpful	Somewhat fair	A Page	0.5						0.333333
R_2D8t25uNNZeUia1	Associate Professor	M	FALSE	12	4-6	0	FALSE	FALSE			6+	Missed some minor points	Somewhat helpful	Somewhat fair	Half a Page	0.5						0.666667
R_2D8t25uNNZeUia1	Associate Professor	M	FALSE	12	4-6	0	FALSE	FALSE			6+	Missed some minor points	Somewhat helpful	Somewhat fair	1-2 Paragraphs	0.5						0.666667
R_2D8t25uNNZeUia1	Associate Professor	M	FALSE	12	4-6	0	FALSE	FALSE			6+	Missed some minor points	Somewhat helpful	Somewhat fair	1-2 Paragraphs	0.75						0.666667
R_2D8t25uNNZeUia1	Associate Professor	M	FALSE	12	4-6	0	FALSE	FALSE			6+	Perfectly	Very helpful	Fair	A Page	1						1
R_3Pv2jGnpMLietZo	Industry Researcher	M	TRUE	19			TRUE
R_2pWtyzlfTlPe7fW	Student	F	FALSE	19	7-9	0	TRUE	TRUE	TRUE	TRUE	3	Perfectly	Somewhat helpful	Fair	1-2 Paragraphs	1
R_2pWtyzlfTlPe7fW	Student	F	FALSE	19	7-9	0	TRUE	TRUE	TRUE	TRUE	3	Perfectly	Very helpful	Fair	1-2 Paragraphs	0
R_2pWtyzlfTlPe7fW	Student	F	FALSE	19	7-9	0	TRUE	TRUE	TRUE	TRUE	3	Misunderstood major points	Not at all	Unfair	1-2 Paragraphs	0
R_3JszTowtjGJANFn	Industry Researcher	F	TRUE	11	1-3	0	TRUE	FALSE			3
R_1IsLziPHqh2ZqCU	Professor	F	TRUE	39	>12	0	TRUE	TRUE	TRUE	TRUE	5
R_9AC6rtfLCUWmPrr	Professor	M	FALSE	8	>12	2	FALSE	FALSE			3	Perfectly	Somewhat helpful	Fair	A Page	1						0.666667
R_9AC6rtfLCUWmPrr	Professor	M	FALSE	8	>12	2	FALSE	FALSE			3	Perfectly	Somewhat helpful	Fair	A Page	0.666667						0.666667
R_9AC6rtfLCUWmPrr	Professor	M	FALSE	8	>12	2	FALSE	FALSE			3	Perfectly	Somewhat helpful	Fair	A Page	0.666667						0.666667
R_41r1ePXdpd0Rmr7	Student		FALSE	38	>12	1	FALSE	FALSE			5	Missed some minor points	Very helpful	Fair	Multiple Pages
R_2VqNZX6j8KYx43u	Postdoctoral Researcher	M	TRUE	30			TRUE
R_2scAxW2fwrSgvwk	Student		FALSE	21
R_3EtyVCEG9jCBSed	Industry Researcher		FALSE	48	10-12	1	FALSE	FALSE			3
R_VPeJfYWAWQEMMvv	Assistant Professor	M	FALSE	53	7-9	1	FALSE	TRUE	TRUE	TRUE	5
R_1LS5Kim7cgTc6Fk	Industry Researcher	M	TRUE	18	>12	1	TRUE	TRUE	TRUE	TRUE	4	Perfectly	Very helpful	Fair	A Page	0.666667	0.333333			0.666667		0.666667
R_1LS5Kim7cgTc6Fk	Industry Researcher	M	TRUE	18	>12	1	TRUE	TRUE	TRUE	TRUE	4	Perfectly	Very helpful	Fair	Multiple Pages	0.666667	0.666667			1		1
R_1LS5Kim7cgTc6Fk	Industry Researcher	M	TRUE	18	>12	1	TRUE	TRUE	TRUE	TRUE	4	Probably didn't read it	Not at all	Very unfair	1-2 Paragraphs	0.5	0.666667			0.666667		1
R_1LS5Kim7cgTc6Fk	Industry Researcher	M	TRUE	18	>12	1	TRUE	TRUE	TRUE	TRUE	4	Perfectly	Very helpful	Fair	Multiple Pages	0.166667	0.666667			1		1
R_10BhvhdGBmxqduM	Industry Researcher	M	FALSE	15	7-9	0	TRUE	FALSE			4	Perfectly	Somewhat helpful	Fair	Half a Page
R_2dYcV1U8bX6AHqz	Industry Researcher	F	FALSE	34	>12	1	TRUE	FALSE			3
R_1K78LVZYolOGlMI	Student	M	FALSE	7	10-12	3	TRUE	TRUE	TRUE	TRUE	4	Missed some minor points	Somewhat helpful	Fair	Half a Page
R_12u4nj6S4i0BDiz	Student	M	FALSE	45	1-3	2	FALSE	FALSE			3
R_3HTy66EUIyqWeRl	Student	M	FALSE	2	4-6	0	FALSE	TRUE	TRUE	TRUE	5
R_2QQfICe3STtdWLP	Industry Researcher	M	FALSE	38	7-9	0	TRUE	TRUE	TRUE	TRUE	5	Perfectly	Somewhat helpful	Fair	Half a Page	1		1		0.75		1
R_2QQfICe3STtdWLP	Industry Researcher	M	FALSE	38	7-9	0	TRUE	TRUE	TRUE	TRUE	5	Missed some minor points	Somewhat helpful	Fair	A Page	0.75		0.75		0.25		0.333333
R_2QQfICe3STtdWLP	Industry Researcher	M	FALSE	38	7-9	0	TRUE	TRUE	TRUE	TRUE	5	Perfectly	Somewhat helpful	Fair	Half a Page	0.75		0.75		0.5		0.666667
R_2QQfICe3STtdWLP	Industry Researcher	M	FALSE	38	7-9	0	TRUE	TRUE	TRUE	TRUE	5	Perfectly	Somewhat helpful	Fair	Half a Page	0.25		0.75		0.25		0.666667
R_2QQfICe3STtdWLP	Industry Researcher	M	FALSE	38	7-9	0	TRUE	TRUE	TRUE	TRUE	5	Perfectly	Somewhat helpful	Fair	Multiple Pages	0.5		0.5		0.25		1
R_2s5CEEzhGPYAl0D	Associate Professor	M	FALSE	23	10-12	2	FALSE	FALSE			4	Perfectly			A Page
R_2pMEwlMUYFK1SYU	Professor	M	TRUE	3	>12	9	TRUE	TRUE	TRUE	TRUE	3	Perfectly	Somewhat helpful	Fair	Half a Page
R_pPZnE1e5vcrpaeJ	Assistant Professor	M	TRUE	42	>12	0	TRUE	TRUE	TRUE	TRUE	4	Missed some minor points	Somewhat helpful	Fair	Half a Page
R_1qWkTwm20HuXZX6	Professor	M	FALSE	13	>12	2	FALSE	FALSE			4
R_2ebeYO17zV3X3uA	Student	M	TRUE	51	1-3	0	TRUE	FALSE			3	Perfectly	Somewhat helpful	Fair	A Page
R_3kMSWHdCoaVcyQu				16
R_3OfAXdWsaYqs4aZ	Student	M	FALSE	13
R_31u7Ig9cGxrzowU	Professor	M	FALSE	2	>12	1	FALSE	TRUE	TRUE	TRUE	5
R_01iUEwIIpq0T18B	Government Researcher	M	FALSE	2
R_1ooHCihpm9Ifizz	Assistant Professor	M	FALSE	53	7-9	0	FALSE	TRUE	TRUE	TRUE	3	Missed some minor points	Somewhat helpful	Fair	Half a Page	0.6						0.333333
R_1ooHCihpm9Ifizz	Assistant Professor	M	FALSE	53	7-9	0	FALSE	TRUE	TRUE	TRUE	3	Perfectly	Not at all	Fair	Half a Page	0.6						0.666667
R_1ooHCihpm9Ifizz	Assistant Professor	M	FALSE	53	7-9	0	FALSE	TRUE	TRUE	TRUE	3	Missed some minor points	Not at all	Fair	A Page	1						0.666667
R_3lELt8DbgoPkU8S	Industry Researcher	M	FALSE	42	4-6	0	TRUE	TRUE	TRUE	TRUE	4
R_31mUh8yhVlaacgP	Assistant Professor	M	FALSE	42	4-6	0	FALSE	TRUE	TRUE	TRUE	3	Missed some minor points	Somewhat helpful	Fair	A Page	0.666667	1	0.666667	1	0.666667	1	0.666667
R_31mUh8yhVlaacgP	Assistant Professor	M	FALSE	42	4-6	0	FALSE	TRUE	TRUE	TRUE	3	Perfectly	Very helpful	Fair	A Page	1	0.666667	1	0.666667	0.666667	1	1
R_31mUh8yhVlaacgP	Assistant Professor	M	FALSE	42	4-6	0	FALSE	TRUE	TRUE	TRUE	3	Missed some minor points	Very helpful	Fair	Half a Page	1	1	0.666667	0.666667	0.666667	1	0.666667
R_2aJpPqFDIxdRFzB	Student	M	FALSE	42	4-6	0	FALSE	TRUE	TRUE	TRUE	3
R_3G1eiOuF4c8EdMq	Assistant Professor	M	FALSE	51	4-6	0	FALSE	FALSE			3
R_3nwTMQtQhwd12gK	Student	M	FALSE	30
R_sAQYVlvFtjyz4EV	Assistant Professor	M	FALSE	4	10-12	1	FALSE	FALSE			3	Perfectly	Very helpful	Fair	A Page	0.833333
R_sAQYVlvFtjyz4EV	Assistant Professor	M	FALSE	4	10-12	1	FALSE	FALSE			3	Missed some minor points	Somewhat helpful	Fair	1-2 Paragraphs	0.833333
R_sAQYVlvFtjyz4EV	Assistant Professor	M	FALSE	4	10-12	1	FALSE	FALSE			3	Missed some minor points	Somewhat helpful	Fair	1-2 Paragraphs	0.666667
R_2D7uFK53kOdVzHX	Assistant Professor	M	FALSE	39	4-6	2	FALSE	TRUE	TRUE	TRUE	3	Missed some minor points	Somewhat helpful	Somewhat fair	Half a Page
R_bkDpqVGIdOoTSYV	Professor	M	TRUE	39	10-12	0	TRUE	TRUE	TRUE	TRUE	4
R_1mIpWxn0AMq9JoF	Postdoctoral Researcher	M	TRUE	4	4-6	0	TRUE	TRUE	TRUE	TRUE	3	Missed some minor points	Very helpful	Fair	A Page	0.666667
R_1mIpWxn0AMq9JoF	Postdoctoral Researcher	M	TRUE	4	4-6	0	TRUE	TRUE	TRUE	TRUE	3	Missed some minor points	Very helpful	Fair	Half a Page	0.833333
R_1mIpWxn0AMq9JoF	Postdoctoral Researcher	M	TRUE	4	4-6	0	TRUE	TRUE	TRUE	TRUE	3	Missed some minor points	Not at all	Fair	1-2 Paragraphs	0.833333
R_2YlzODRz7yTNXm6	Other	M	FALSE	12
R_1C1RdZa7jSqV990	Student	M	FALSE	18	10-12	1	FALSE	FALSE			4	Missed some minor points	Very helpful	Fair	Multiple Pages
R_2SffBusnDMcy1zQ	Industry Researcher	M	FALSE	35	7-9	1	TRUE	TRUE	TRUE	TRUE	4
R_2e24Tx5NrwZBoqe	Other	M	FALSE	6	7-9	0	FALSE	TRUE	TRUE	TRUE	5	Misunderstood major points	Not at all	Unfair	1-2 Paragraphs	0.333333
R_2e24Tx5NrwZBoqe	Other	M	FALSE	6	7-9	0	FALSE	TRUE	TRUE	TRUE	5	Perfectly	Very helpful	Fair	1-2 Paragraphs	1
R_2e24Tx5NrwZBoqe	Other	M	FALSE	6	7-9	0	FALSE	TRUE	TRUE	TRUE	5	Missed some minor points	Somewhat helpful	Fair	A Page	0.333333
R_2e24Tx5NrwZBoqe	Other	M	FALSE	6	7-9	0	FALSE	TRUE	TRUE	TRUE	5	Missed some minor points	Not at all	Fair	1-2 Paragraphs	0.666667
R_2e24Tx5NrwZBoqe	Other	M	FALSE	6	7-9	0	FALSE	TRUE	TRUE	TRUE	5	Perfectly	Very helpful	Fair	1-2 Paragraphs	0.666667
R_1CvXz9S7qO1zGkw	Professor	M	FALSE	21	>12	2	FALSE	FALSE			6+	Perfectly	Very helpful	Fair	A Page
R_2qpKxY49pB2YPpm	Associate Professor	M	FALSE	9	>12	0	FALSE	TRUE	TRUE	TRUE	4
R_eLDFPLIElv7Fxyp	Assistant Professor	M	FALSE	45	1-3	0	FALSE	FALSE			5	Missed some minor points	Somewhat helpful	Fair	Half a Page
R_eLDFPLIElv7Fxyp	Assistant Professor	M	FALSE	45	1-3	0	FALSE	FALSE			5	Missed some minor points	Somewhat helpful	Fair	1-2 Paragraphs
R_eLDFPLIElv7Fxyp	Assistant Professor	M	FALSE	45	1-3	0	FALSE	FALSE			5	Missed some minor points	Somewhat helpful	Fair	1-2 Paragraphs
R_eLDFPLIElv7Fxyp	Assistant Professor	M	FALSE	45	1-3	0	FALSE	FALSE			5	Missed some minor points	Somewhat helpful	Fair	1-2 Paragraphs
R_eLDFPLIElv7Fxyp	Assistant Professor	M	FALSE	45	1-3	0	FALSE	FALSE			5	Missed some minor points	Somewhat helpful	Fair	1-2 Paragraphs
R_10UVXSiUfa1FCIa	Student	M	TRUE	7			TRUE
R_1Ke7OO2FxcpKsEq	Student	M	FALSE	3	>12	0	FALSE	TRUE	TRUE	TRUE	3
R_12RTkoLzvflw1UR	Student		FALSE	12
R_2sdsBCLzDb6UgoX	Student	M	FALSE	7	4-6	0	FALSE	FALSE			3
R_27KEuVtDcdtzbm6	Assistant Professor	M	FALSE	53	7-9	0	FALSE	TRUE	TRUE	TRUE	4	Perfectly	Very helpful	Fair	Multiple Pages	0.75						0.333333
R_27KEuVtDcdtzbm6	Assistant Professor	M	FALSE	53	7-9	0	FALSE	TRUE	TRUE	TRUE	4	Perfectly	Very helpful	Fair	A Page	0.75						0.333333
R_27KEuVtDcdtzbm6	Assistant Professor	M	FALSE	53	7-9	0	FALSE	TRUE	TRUE	TRUE	4	Perfectly	Somewhat helpful	Fair	A Page	0.75						0.666667
R_27KEuVtDcdtzbm6	Assistant Professor	M	FALSE	53	7-9	0	FALSE	TRUE	TRUE	TRUE	4	Missed some minor points	Very helpful	Fair	Multiple Pages	0.75						1
R_27KEuVtDcdtzbm6	Assistant Professor	M	FALSE	53	7-9	0	FALSE	TRUE	TRUE	TRUE	4
R_1EcZQWHS7ing58K				31
R_r7TGaiW117Rv4Bz	Student	M	FALSE	21	7-9	0	FALSE	TRUE	TRUE	TRUE	5	Perfectly	Very helpful	Fair	Multiple Pages	0.6						0.75
R_r7TGaiW117Rv4Bz	Student	M	FALSE	21	7-9	0	FALSE	TRUE	TRUE	TRUE	5	Perfectly	Very helpful	Fair	Multiple Pages	0.4						0.5
R_r7TGaiW117Rv4Bz	Student	M	FALSE	21	7-9	0	FALSE	TRUE	TRUE	TRUE	5	Perfectly	Very helpful	Fair	Multiple Pages	0.8						0.25
R_2bJDKDNWyLrwJLj	Postdoctoral Researcher		TRUE	4	4-6	0	TRUE	FALSE			3	Perfectly	Not at all	Fair	Half a Page
R_r0CAxFN8hzl3xAd	Assistant Professor	M	FALSE	48	4-6	0	FALSE	TRUE	TRUE	TRUE	3	Missed some minor points	Very helpful	Fair	A Page
R_12zkK9Frg4rtYsq	Student	F	FALSE	14	4-6	0	TRUE	TRUE	TRUE	TRUE	5
R_2uvApReZZYipLWp	Student	Other	TRUE	30			TRUE
R_3qPtTKXf0SbSqxh	Student	M	FALSE	48	7-9	0	FALSE	FALSE			3	Perfectly	Very helpful	Fair	A Page
R_3elQboDMrgqLPdH	Student	M	FALSE	7	4-6	1	FALSE	TRUE	TRUE	TRUE	3
R_23aatgUQmDql3zp	Student	M	FALSE	18	1-3	0	FALSE	FALSE			3
R_XQZVWermQFEmf1T	Industry Researcher	M	FALSE	11
R_1ITouVi8OygFezW	Student	F	FALSE	48	4-6	0	FALSE	FALSE			3	Perfectly	Somewhat helpful	Fair	A Page	1	0.75	0.75	0.75	0.75	0.75
R_1ITouVi8OygFezW	Student	F	FALSE	48	4-6	0	FALSE	FALSE			3	Perfectly	Somewhat helpful	Fair	Multiple Pages	1	0.5	1	0.75	0.75	1
R_1ITouVi8OygFezW	Student	F	FALSE	48	4-6	0	FALSE	FALSE			3	Missed some minor points	Somewhat helpful	Fair	1-2 Paragraphs	0.75	0.75	0.75	0.5	0.75	0.75
R_20MbC8yhdwFQNPm	Postdoctoral Researcher	M	FALSE	12	10-12	0	FALSE	FALSE			6+	Perfectly	Very helpful	Fair	Half a Page	0.75						0.666667
R_20MbC8yhdwFQNPm	Postdoctoral Researcher	M	FALSE	12	10-12	0	FALSE	FALSE			6+	Perfectly	Somewhat helpful	Fair	Half a Page	0.75						1
R_20MbC8yhdwFQNPm	Postdoctoral Researcher	M	FALSE	12	10-12	0	FALSE	FALSE			6+	Missed some minor points	Very helpful	Fair	A Page	0.5						1
R_20MbC8yhdwFQNPm	Postdoctoral Researcher	M	FALSE	12	10-12	0	FALSE	FALSE			6+	Missed some minor points	Somewhat helpful	Fair	Half a Page	0.5						1
R_20MbC8yhdwFQNPm	Postdoctoral Researcher	M	FALSE	12	10-12	0	FALSE	FALSE			6+	Missed some minor points	Somewhat helpful	Fair	A Page	0.5						1
R_20MbC8yhdwFQNPm	Postdoctoral Researcher	M	FALSE	12	10-12	0	FALSE	FALSE			6+	Missed some minor points	Somewhat helpful	Fair	1-2 Paragraphs	0.5						0.666667
R_YWgbge4JhzQG14l	Associate Professor	M	TRUE	55	>12	0	TRUE	TRUE	TRUE	TRUE	4	Missed some minor points	Somewhat helpful	Fair	A Page	1
R_YWgbge4JhzQG14l	Associate Professor	M	TRUE	55	>12	0	TRUE	TRUE	TRUE	TRUE	4	Missed some minor points	Somewhat helpful	Fair	A Page	0.666667
R_YWgbge4JhzQG14l	Associate Professor	M	TRUE	55	>12	0	TRUE	TRUE	TRUE	TRUE	4	Missed some minor points	Somewhat helpful	Fair	A Page	0.666667
R_YWgbge4JhzQG14l	Associate Professor	M	TRUE	55	>12	0	TRUE	TRUE	TRUE	TRUE	4	Missed some minor points	Somewhat helpful	Fair	Multiple Pages	0.666667
R_1opPB4YEvbdg6oP	Student	F	FALSE	7	>12	1	TRUE	TRUE	TRUE	TRUE	3	Perfectly	Very helpful	Fair	A Page	0.75
R_1opPB4YEvbdg6oP	Student	F	FALSE	7	>12	1	TRUE	TRUE	TRUE	TRUE	3				1-2 Paragraphs	0.75
R_1opPB4YEvbdg6oP	Student	F	FALSE	7	>12	1	TRUE	TRUE	TRUE	TRUE	3				1-2 Paragraphs	0.5
R_3jZMjHoU8t4cdVu	Student	F	FALSE	3	4-6	1	FALSE	TRUE	TRUE	TRUE	4
R_3EoqqaLgr5kumyy	Student	M	FALSE	34	4-6	4	FALSE	FALSE			3	Missed some minor points	Somewhat helpful	Fair	Multiple Pages
R_1nYGnLeXXRkGVzM	Student	M	FALSE	39	>12	0	FALSE	TRUE	TRUE	TRUE	3	Missed some minor points	Very helpful	Fair	Multiple Pages
R_1pKwtwqbPEXocUd	Student	M	FALSE	37	7-9	0	FALSE	FALSE			4
R_2Pcgrjogc7qUdEW	Associate Professor	M	TRUE	55	7-9	0	TRUE	TRUE	TRUE	TRUE	5	Missed some minor points	Somewhat helpful	Fair	Multiple Pages	0.666667						0.5
R_2Pcgrjogc7qUdEW	Associate Professor	M	TRUE	55	7-9	0	TRUE	TRUE	TRUE	TRUE	5	Missed some minor points	Somewhat helpful	Fair	Multiple Pages	0.666667						0.5
R_2Pcgrjogc7qUdEW	Associate Professor	M	TRUE	55	7-9	0	TRUE	TRUE	TRUE	TRUE	5	Perfectly	Very helpful	Fair	A Page	1						1
R_2Pcgrjogc7qUdEW	Associate Professor	M	TRUE	55	7-9	0	TRUE	TRUE	TRUE	TRUE	5	Missed some minor points	Somewhat helpful	Unfair	Multiple Pages	0.333333						1
R_2Pcgrjogc7qUdEW	Associate Professor	M	TRUE	55	7-9	0	TRUE	TRUE	TRUE	TRUE	5	Missed some minor points	Somewhat helpful	Unfair	Multiple Pages	0.333333						0.5
R_27WNcxcvhL3ryYw	Industry Researcher	M	FALSE	10	>12	0	FALSE	TRUE	TRUE	TRUE	5	Missed some minor points	Somewhat helpful	Fair	1-2 Paragraphs
R_2Vz2ZJY93Te3nfx	Assistant Professor	M	FALSE	49	10-12	1	FALSE	FALSE			6+
R_ZzbV6wCwilsYABr	Industry Researcher	M	FALSE	33	1-3	0	FALSE	TRUE	FALSE	TRUE	3	Missed some minor points	Very helpful	Somewhat fair	A Page	1
R_ZzbV6wCwilsYABr	Industry Researcher	M	FALSE	33	1-3	0	FALSE	TRUE	FALSE	TRUE	3	Missed some minor points	Somewhat helpful	Somewhat fair	A Page	1
R_ZzbV6wCwilsYABr	Industry Researcher	M	FALSE	33	1-3	0	FALSE	TRUE	FALSE	TRUE	3	Missed some minor points	Very helpful	Fair	A Page	0.666667
R_2QQBEXdwkW4ETKs	Student	M	FALSE	7	4-6	0	FALSE	FALSE			3	Perfectly	Somewhat helpful	Somewhat fair	A Page	0.5						0.5
R_2QQBEXdwkW4ETKs	Student	M	FALSE	7	4-6	0	FALSE	FALSE			3	Misunderstood major points	Not at all	Unfair	Half a Page	0.5						0
R_2QQBEXdwkW4ETKs	Student	M	FALSE	7	4-6	0	FALSE	FALSE			3	Perfectly	Very helpful	Fair	Multiple Pages	1
R_2QQBEXdwkW4ETKs	Student	M	FALSE	7	4-6	0	FALSE	FALSE			3
R_bwti55uPA4mDiJb	Postdoctoral Researcher	M	FALSE	11	4-6	2	FALSE	FALSE			4	Missed some minor points	Somewhat helpful	Fair	A Page
R_2TTxJPpPwGiuxUe	Student	M	FALSE	44	>12	3	FALSE	TRUE	TRUE	TRUE	3	Missed some minor points	Somewhat helpful	Fair	Multiple Pages
R_bKm9KcpxW3HX2bT	Professor	M	TRUE	50			TRUE
R_WpxG8i2RpwOJejn	Industry Researcher	M	TRUE	31	>12	2	TRUE	TRUE	TRUE	FALSE	5	Missed some minor points	Not at all	Fair	Half a Page	1						0.666667
R_WpxG8i2RpwOJejn	Industry Researcher	M	TRUE	31	>12	2	TRUE	TRUE	TRUE	FALSE	5	Misunderstood major points	Somewhat helpful	Somewhat fair	Half a Page	0.5						0.666667
R_WpxG8i2RpwOJejn	Industry Researcher	M	TRUE	31	>12	2	TRUE	TRUE	TRUE	FALSE	5	Missed some minor points	Somewhat helpful	Somewhat fair	Half a Page	0.25						0.333333
R_WpxG8i2RpwOJejn	Industry Researcher	M	TRUE	31	>12	2	TRUE	TRUE	TRUE	FALSE	5	Misunderstood major points	Somewhat helpful	Somewhat fair	Half a Page	0.75						0.333333
R_WpxG8i2RpwOJejn	Industry Researcher	M	TRUE	31	>12	2	TRUE	TRUE	TRUE	FALSE	5	Missed some minor points	Not at all	Fair	Half a Page	0.75						0.333333
R_WpxG8i2RpwOJejn	Industry Researcher	M	TRUE	37	>12	2	TRUE	FALSE			5	Missed some minor points	Very helpful	Fair	Multiple Pages	0.75						0.666667
R_WpxG8i2RpwOJejn	Industry Researcher	M	TRUE	37	>12	2	TRUE	FALSE			5	Missed some minor points	Somewhat helpful	Somewhat fair	A Page	0.5						0.333333
R_WpxG8i2RpwOJejn	Industry Researcher	M	TRUE	37	>12	2	TRUE	FALSE			5	Misunderstood major points	Very helpful	Somewhat fair	Multiple Pages	0.25						0.666667
R_WpxG8i2RpwOJejn	Industry Researcher	M	TRUE	37	>12	2	TRUE	FALSE			5	Misunderstood major points	Not at all	Fair	Half a Page	1						0.666667
R_WpxG8i2RpwOJejn	Industry Researcher	M	TRUE	37	>12	2	TRUE	FALSE			5	Misunderstood major points	Not at all	Unfair	Half a Page	0.75						0.666667
R_WpxG8i2RpwOJejn	Industry Researcher	M	TRUE	21	>12	1	TRUE	FALSE			6+	Missed some minor points	Very helpful	Fair	Multiple Pages	0.5	0.333333
R_WpxG8i2RpwOJejn	Industry Researcher	M	TRUE	21	>12	1	TRUE	FALSE			6+	Misunderstood major points	Somewhat helpful	Unfair	A Page	0.5						0
R_WpxG8i2RpwOJejn	Industry Researcher	M	TRUE	21	>12	1	TRUE	FALSE			6+	Misunderstood major points	Somewhat helpful	Somewhat fair	A Page	0.75						0.333333
R_WpxG8i2RpwOJejn	Industry Researcher	M	TRUE	21	>12	1	TRUE	FALSE			6+	Misunderstood major points	Not at all	Fair	Half a Page	0.75						0.333333
R_WpxG8i2RpwOJejn	Industry Researcher	M	TRUE	21	>12	1	TRUE	FALSE			6+	Misunderstood major points	Somewhat helpful	Somewhat fair	Half a Page	0.75						0.666667
R_WpxG8i2RpwOJejn	Industry Researcher	M	TRUE	21	>12	1	TRUE	FALSE			6+	Missed some minor points	Very helpful	Fair	Multiple Pages	0.75						1
R_2TzLfAiRPTcnCaC	Assistant Professor	M	TRUE	2			TRUE
R_3ly57wCvkVuYx8g	Assistant Professor	M	TRUE	44	10-12	0	TRUE	TRUE	TRUE	TRUE	4	Perfectly	Very helpful	Fair	Half a Page
R_3j22gKjvp3DuNLg	Other	M	FALSE	1	4-6	1	FALSE	FALSE			4	Missed some minor points	Very helpful	Fair	Multiple Pages
R_Bt9JmJGA63NT8fD	Student	M	FALSE	39
R_3KDgIvSNcGlAWjb	Professor	M	FALSE	11	7-9	0	FALSE	FALSE			3	Perfectly	Somewhat helpful	Fair	Half a Page
R_1nMwvGsb924Hanl	Government Researcher	M	FALSE	39	10-12	0	FALSE	FALSE			4	Perfectly	Somewhat helpful	Fair	Half a Page	0.666667
R_1nMwvGsb924Hanl	Government Researcher	M	FALSE	39	10-12	0	FALSE	FALSE			4	Perfectly	Not at all	Fair	Half a Page	0.666667
R_1nMwvGsb924Hanl	Government Researcher	M	FALSE	39	10-12	0	FALSE	FALSE			4	Misunderstood major points	Not at all	Fair	1-2 Paragraphs	1
R_1nMwvGsb924Hanl	Government Researcher	M	FALSE	39	10-12	0	FALSE	FALSE			4	Missed some minor points	Somewhat helpful	Fair	Half a Page	0.666667
R_1nMwvGsb924Hanl	Government Researcher	M	FALSE	23	10-12	0	FALSE	FALSE			4	Perfectly			Half a Page	0.333333
R_1nMwvGsb924Hanl	Government Researcher	M	FALSE	23	10-12	0	FALSE	FALSE			4	Perfectly	Somewhat helpful	Fair	Half a Page	0.666667
R_1nMwvGsb924Hanl	Government Researcher	M	FALSE	23	10-12	0	FALSE	FALSE			4	Perfectly	Very helpful		A Page	0.666667
R_1nMwvGsb924Hanl	Government Researcher	M	FALSE	23	10-12	0	FALSE	FALSE			4	Perfectly	Very helpful	Fair	Half a Page	1
R_2OSWzo5qe8RkgTG	Associate Professor	M	FALSE	10
R_3iUTXMRRhqiK303	Assistant Professor	M	TRUE	34	10-12	0	TRUE	TRUE	TRUE	TRUE	5	Missed some minor points	Somewhat helpful	Fair	A Page	0.75		1	0.5	0.25		0.666667
R_3iUTXMRRhqiK303	Assistant Professor	M	TRUE	34	10-12	0	TRUE	TRUE	TRUE	TRUE	5	Missed some minor points	Very helpful	Fair	A Page	0.5		0.666667	0.5	0.5		0.666667
R_3iUTXMRRhqiK303	Assistant Professor	M	TRUE	34	10-12	0	TRUE	TRUE	TRUE	TRUE	5	Missed some minor points	Somewhat helpful	Fair	A Page	0.25		0.333333	0.25	0.25		1
R_3iUTXMRRhqiK303	Assistant Professor	M	TRUE	34	10-12	0	TRUE	TRUE	TRUE	TRUE	5	Perfectly	Very helpful	Fair	A Page	0.75		1	0.5	0.75		0.666667
R_3iUTXMRRhqiK303	Assistant Professor	M	TRUE	34	10-12	0	TRUE	TRUE	TRUE	TRUE	5	Perfectly	Somewhat helpful	Somewhat fair	A Page	0.25		1	0.25	0.25		1
R_2ZHqFu5hWUDDgl4	Professor	M	TRUE	34	10-12	0	TRUE	FALSE			3
R_ebUCkQsRgPGx5aF	Industry Researcher	M	FALSE	31
R_3n96scjKGKplqMY	Assistant Professor	M	FALSE	39	>12	0	FALSE	TRUE	TRUE	FALSE	5	Missed some minor points	Somewhat helpful		Half a Page
R_2qCoR8UwerDWwoL	Government Researcher	M	FALSE	39	>12	0	FALSE	TRUE	TRUE	TRUE	4	Perfectly	Somewhat helpful	Fair	A Page
R_p5iWHNSno72LNhT	Industry Researcher	M	FALSE	34
R_1rOZowkU1DNcAEF	Professor	M	TRUE	34	7-9	0	TRUE	FALSE			3	Misunderstood major points	Somewhat helpful	Somewhat fair	A Page	0.25
R_1rOZowkU1DNcAEF	Professor	M	TRUE	34	7-9	0	TRUE	FALSE			3	Missed some minor points	Somewhat helpful	Fair	1-2 Paragraphs	0.5
R_1rOZowkU1DNcAEF	Professor	M	TRUE	34	7-9	0	TRUE	FALSE			3	Perfectly	Somewhat helpful	Fair	Half a Page	0.5
R_bgdIb92DUywnRBf	Other	M	FALSE	15	4-6	0	FALSE	TRUE	FALSE	TRUE	3
R_bfR0LzObHpSlr0t	Student	F	FALSE	31	7-9	3	FALSE	FALSE			4	Missed some minor points	Not at all	Fair	1-2 Paragraphs	0.5						0
R_bfR0LzObHpSlr0t	Student	F	FALSE	31	7-9	3	FALSE	FALSE			4	Perfectly	Somewhat helpful	Fair	Half a Page	0.75						0.333333
R_bfR0LzObHpSlr0t	Student	F	FALSE	31	7-9	3	FALSE	FALSE			4	Missed some minor points	Not at all	Fair	1-2 Paragraphs	0.5						0.333333
R_bfR0LzObHpSlr0t	Student	F	FALSE	31	7-9	3	FALSE	FALSE			4	Missed some minor points	Not at all	Fair	1-2 Paragraphs	0.5						0.333333
R_qLpQMvxYWpRGuqZ	Student	M	TRUE	53	4-6	0	TRUE	TRUE	TRUE	TRUE	3
R_22CXjXcHqMKHu99	Student	M	FALSE	10	7-9	1	FALSE	FALSE			5	Missed some minor points	Somewhat helpful	Fair	Multiple Pages	1			1	0.666667		0.666667
R_22CXjXcHqMKHu99	Student	M	FALSE	10	7-9	1	FALSE	FALSE			5	Perfectly	Somewhat helpful	Fair	A Page	0.75			0.666667	0.666667		1
R_22CXjXcHqMKHu99	Student	M	FALSE	10	7-9	1	FALSE	FALSE			5	Missed some minor points	Somewhat helpful	Fair	Multiple Pages	0.75			0.666667	0.666667		0.333333
R_22CXjXcHqMKHu99	Student	M	FALSE	10	7-9	1	FALSE	FALSE			5	Missed some minor points	Somewhat helpful	Fair	A Page	0.75			0.666667	1		0.333333
R_22CXjXcHqMKHu99	Student	M	FALSE	10	7-9	1	FALSE	FALSE			5	Missed some minor points	Somewhat helpful	Fair	A Page	0.5			0.666667	0.666667		0.666667
R_2RXkdYJJ2vWoFwt	Associate Professor	F	TRUE	8	10-12	0	TRUE	FALSE			3
R_3h5xltEUaeoLHJv	Student	M	FALSE	7	1-3	0	FALSE	TRUE	TRUE	TRUE	3	Perfectly	Very helpful	Fair	1-2 Paragraphs	1	1	1	1	1	1	1
R_3h5xltEUaeoLHJv	Student	M	FALSE	7	1-3	0	FALSE	TRUE	TRUE	TRUE	3	Missed some minor points	Somewhat helpful	Fair	1-2 Paragraphs	0.75	0.75	0.5	0.5	0.5	0.75	0.75
R_3h5xltEUaeoLHJv	Student	M	FALSE	7	1-3	0	FALSE	TRUE	TRUE	TRUE	3	Missed some minor points	Very helpful	Fair	1-2 Paragraphs	0.75	0.5	0.5	0.5	0.75	0.75	0.75
R_9HVLEgCZzOmyQy5	Industry Researcher	M	FALSE	50	4-6	1	FALSE	TRUE	TRUE	TRUE	6+	Missed some minor points	Somewhat helpful	Fair	A Page
R_8rclHr7Sm2BVGgh	Assistant Professor	M	FALSE	5	>12	0	TRUE	TRUE	TRUE	TRUE	3	Missed some minor points			A Page
R_1Fh17RNPXmIuYyd	Industry Researcher	M	FALSE	3	7-9	0	TRUE	FALSE			3	Perfectly	Somewhat helpful	Fair	Multiple Pages
R_1dE5zt56qeqyIDf	Industry Researcher	M	FALSE	31	>12	0	TRUE	TRUE	TRUE	TRUE	5	Missed some minor points	Not at all	Fair	Half a Page	0.5
R_1dE5zt56qeqyIDf	Industry Researcher	M	FALSE	31	>12	0	TRUE	TRUE	TRUE	TRUE	5	Perfectly	Somewhat helpful	Fair	Half a Page	1
R_1dE5zt56qeqyIDf	Industry Researcher	M	FALSE	31	>12	0	TRUE	TRUE	TRUE	TRUE	5	Missed some minor points	Somewhat helpful	Fair	1-2 Paragraphs	0.75
R_1dE5zt56qeqyIDf	Industry Researcher	M	FALSE	31	>12	0	TRUE	TRUE	TRUE	TRUE	5	Perfectly	Very helpful	Fair	A Page	0.75
R_1dE5zt56qeqyIDf	Industry Researcher	M	FALSE	31	>12	0	TRUE	TRUE	TRUE	TRUE	5	Misunderstood major points	Somewhat helpful	Somewhat fair	A Page	0
R_3mmXJ7NuoMCAUPM	Student	M	TRUE	7	4-6	0	TRUE	FALSE			4	Perfectly	Somewhat helpful	Somewhat fair	A Page	0
R_3mmXJ7NuoMCAUPM	Student	M	TRUE	7	4-6	0	TRUE	FALSE			4	Perfectly	Somewhat helpful	Fair	A Page	0.666667
R_3mmXJ7NuoMCAUPM	Student	M	TRUE	7	4-6	0	TRUE	FALSE			4	Perfectly	Somewhat helpful	Fair	Half a Page	0.666667
R_3mmXJ7NuoMCAUPM	Student	M	TRUE	7	4-6	0	TRUE	FALSE			4	Missed some minor points	Somewhat helpful	Fair	Half a Page	0.333333
R_6u8mB913wiAa8W5	Student	M	FALSE	39	7-9	0	FALSE	TRUE	TRUE	TRUE	5
R_Zf4i33DNF6QcbdL	Student		FALSE	10	>12	2	FALSE	TRUE	TRUE	TRUE	5	Perfectly	Somewhat helpful	Fair	Half a Page		0.666667	0.666667	1	1		1
R_Zf4i33DNF6QcbdL	Student		FALSE	10	>12	2	FALSE	TRUE	TRUE	TRUE	5	Perfectly	Very helpful	Fair	Half a Page		1	0.666667	0.666667	1		1
R_Zf4i33DNF6QcbdL	Student		FALSE	10	>12	2	FALSE	TRUE	TRUE	TRUE	5	Missed some minor points	Somewhat helpful	Somewhat fair	Half a Page		0.666667	0.666667	0.666667	0.666667		1
R_Zf4i33DNF6QcbdL	Student		FALSE	10	>12	2	FALSE	TRUE	TRUE	TRUE	5	Perfectly	Somewhat helpful	Somewhat fair	1-2 Paragraphs		1	0.666667	1	1		1
R_Zf4i33DNF6QcbdL	Student		FALSE	10	>12	2	FALSE	TRUE	TRUE	TRUE	5	Perfectly	Somewhat helpful	Fair	1-2 Paragraphs		1	0.666667	1	0.666667		0.5
